# Supplementary material for: Comprehensive bioinformatics analysis of human cytomegalovirus pathway genes in pan-cancer
Source: Springer Nature journal article supplement (doi:10.1186/s40246-024-00633-5), 2024-06-17

**A**

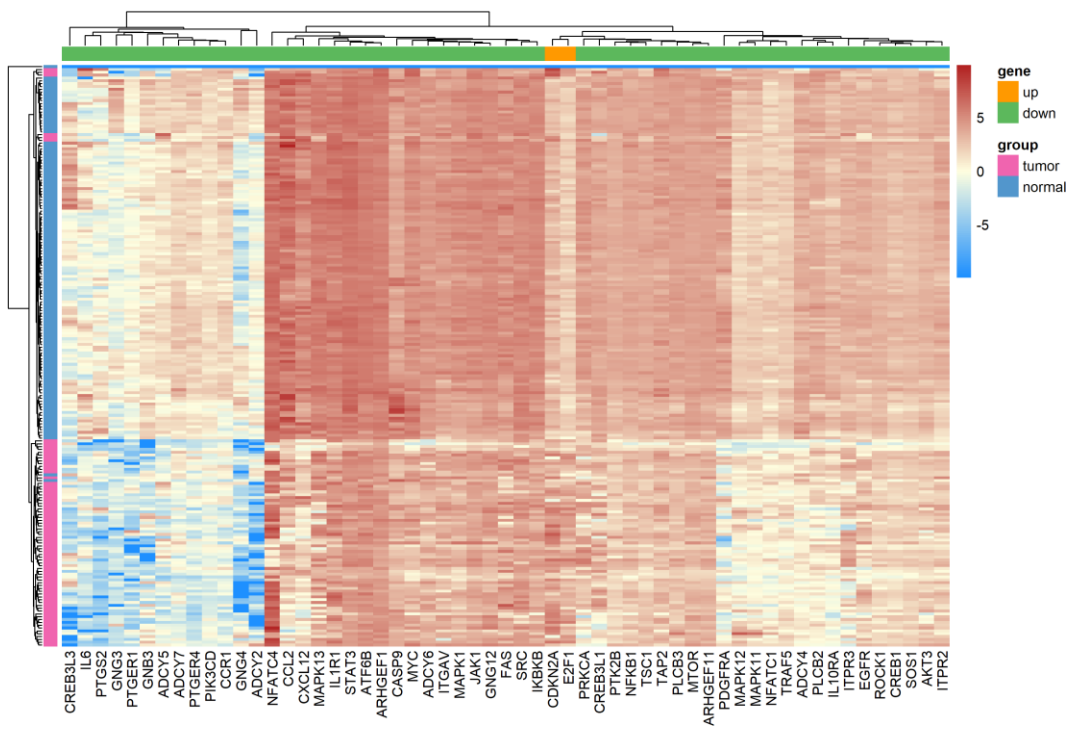

**B**

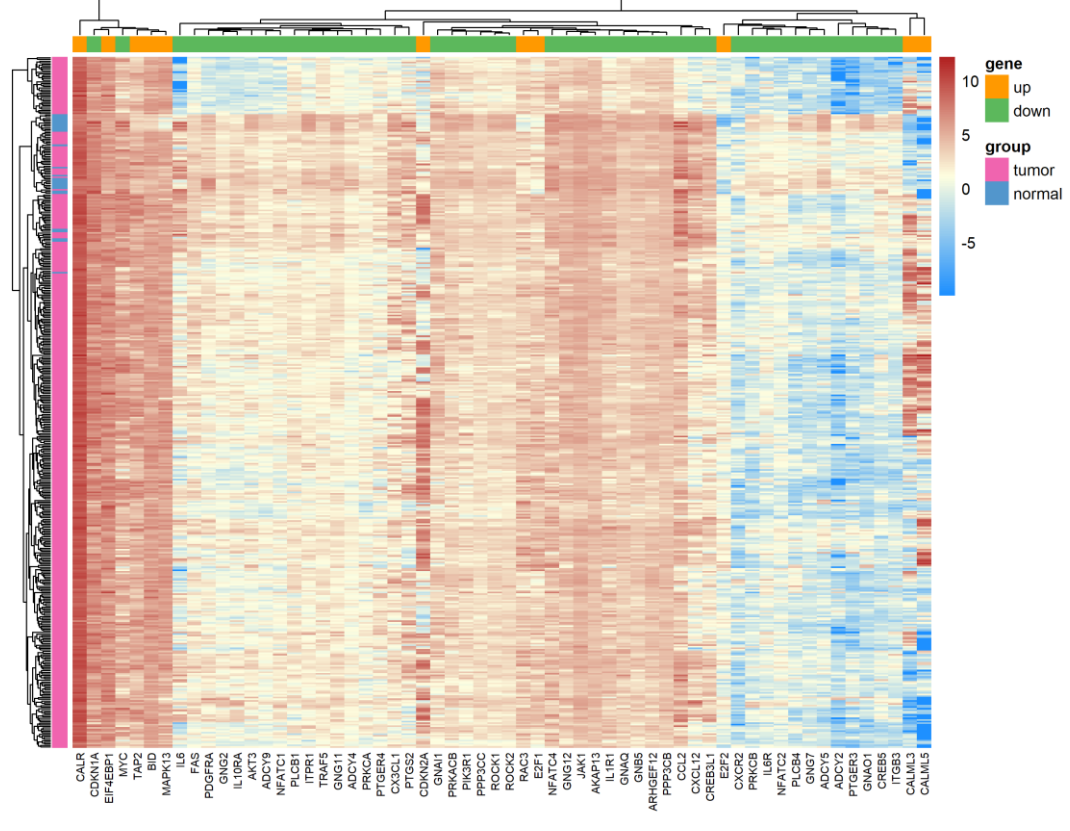

C

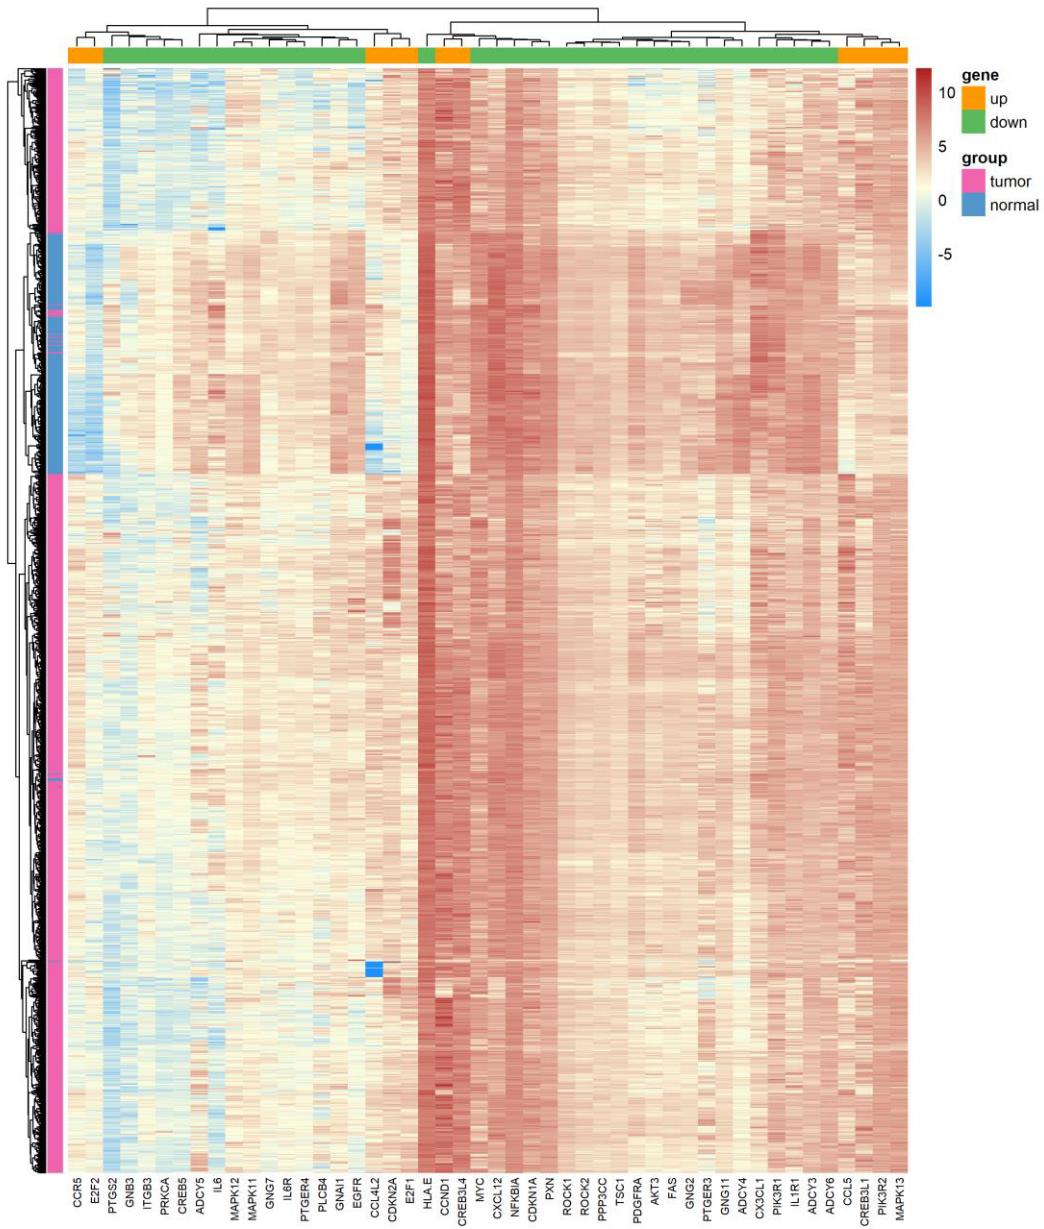

D

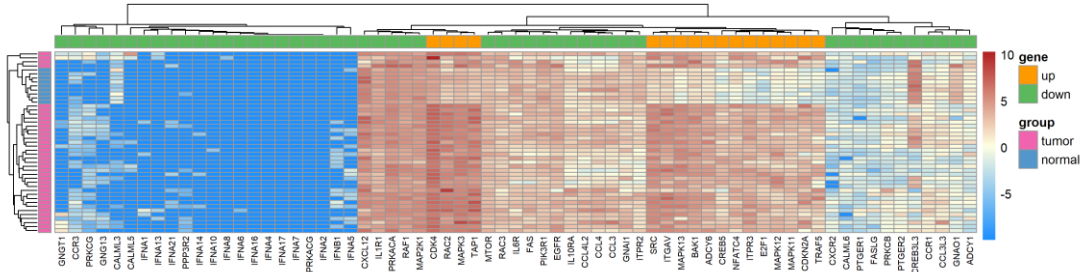

**E**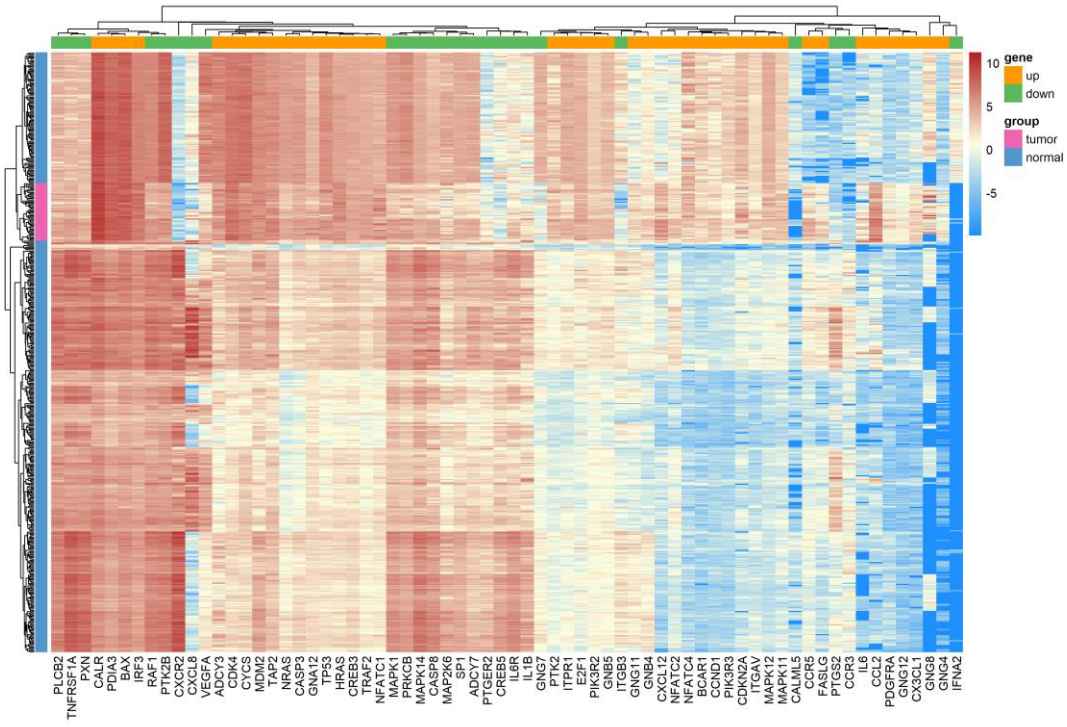**F**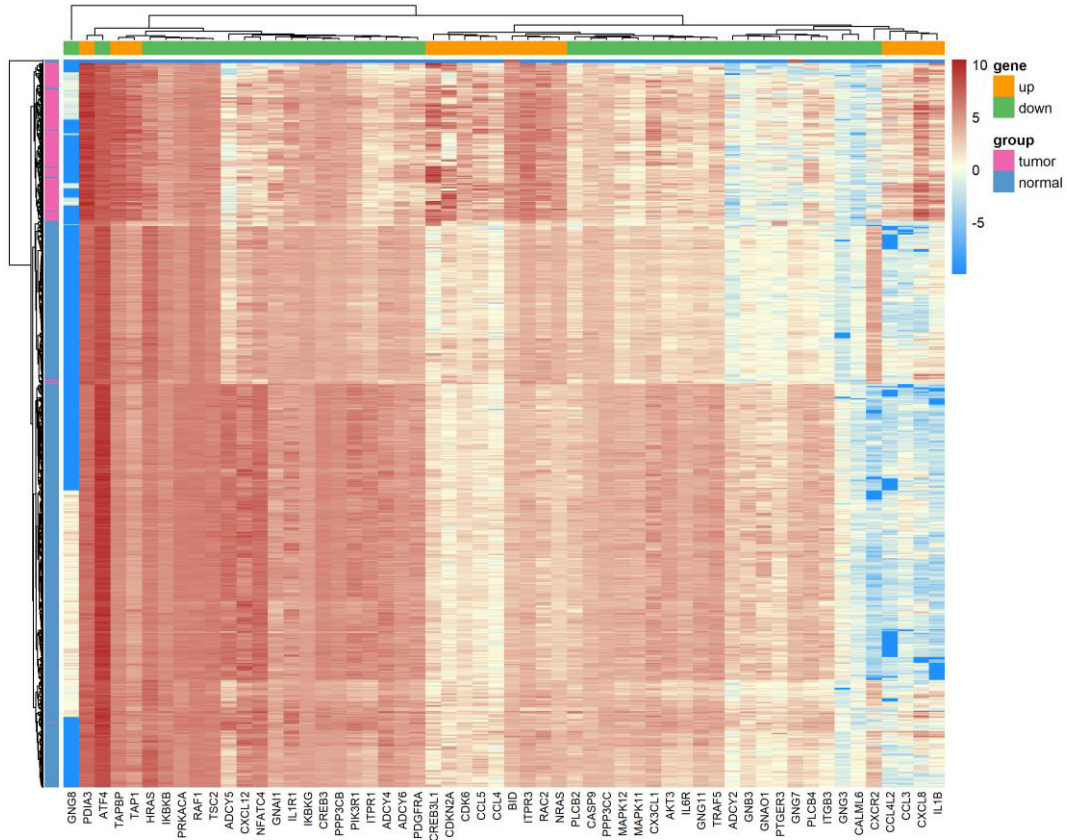

**G**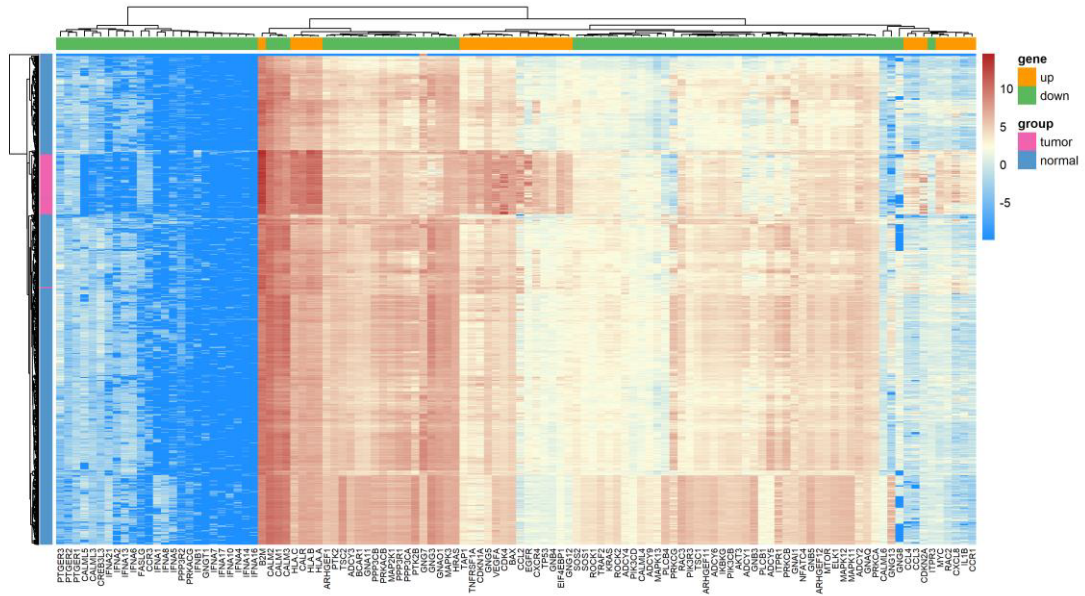**H**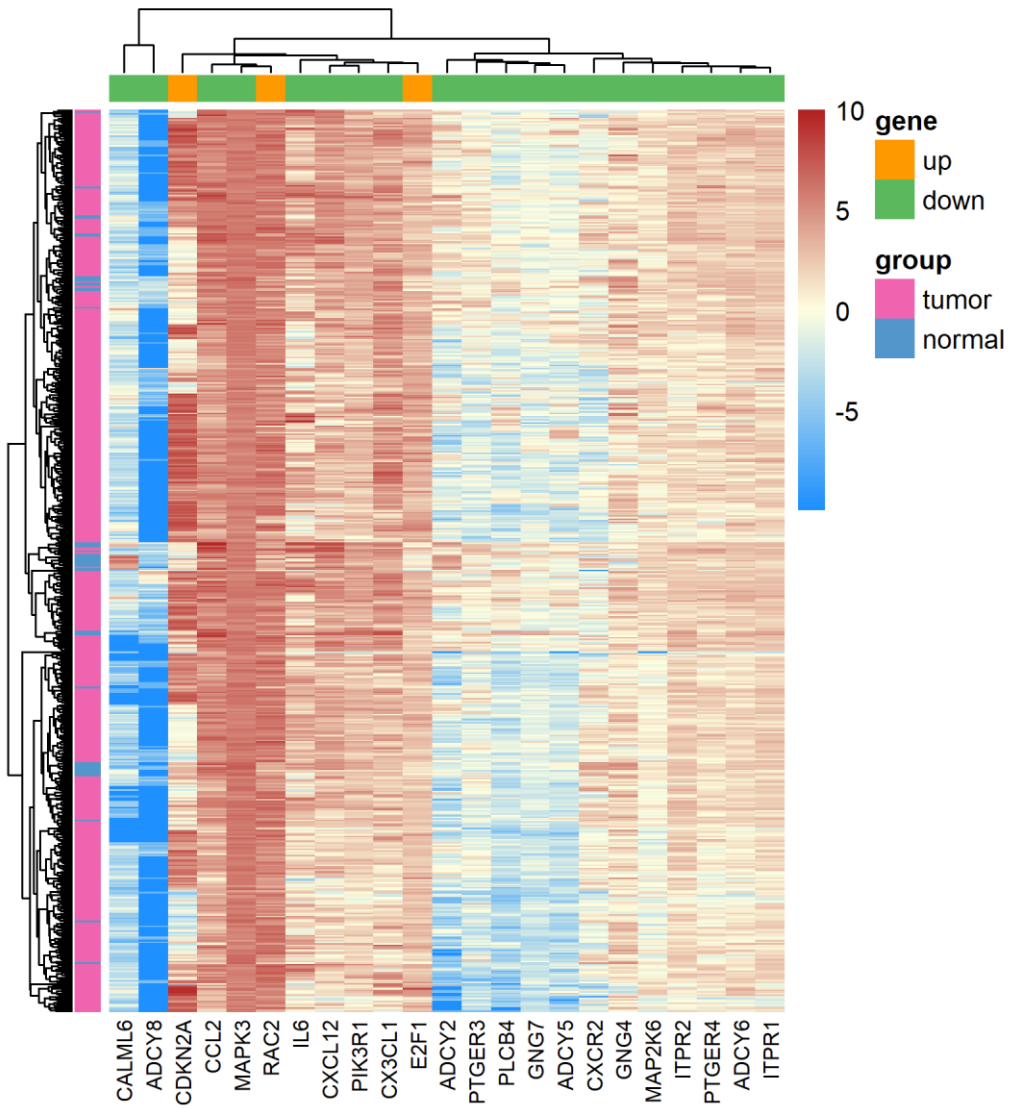



K

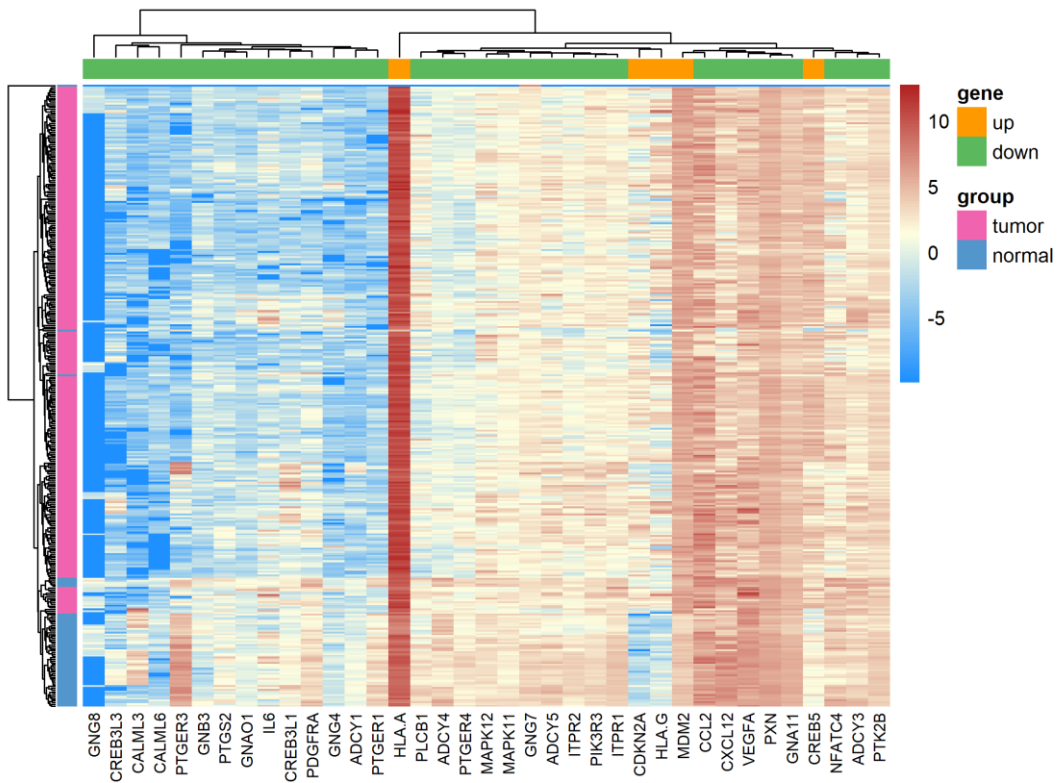

L

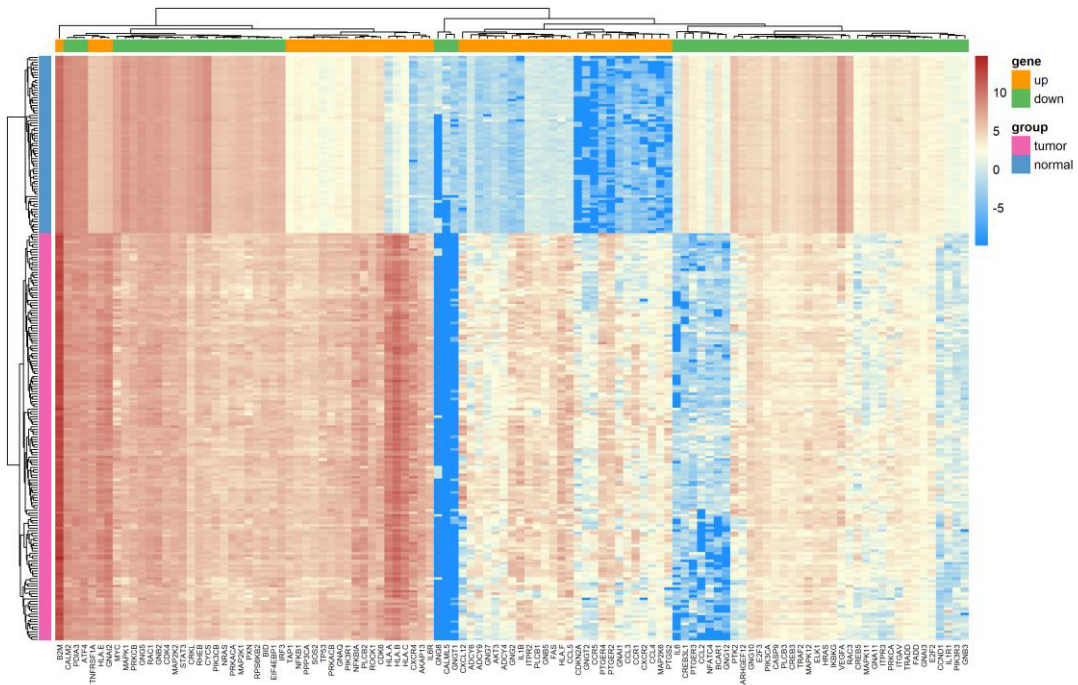

**M**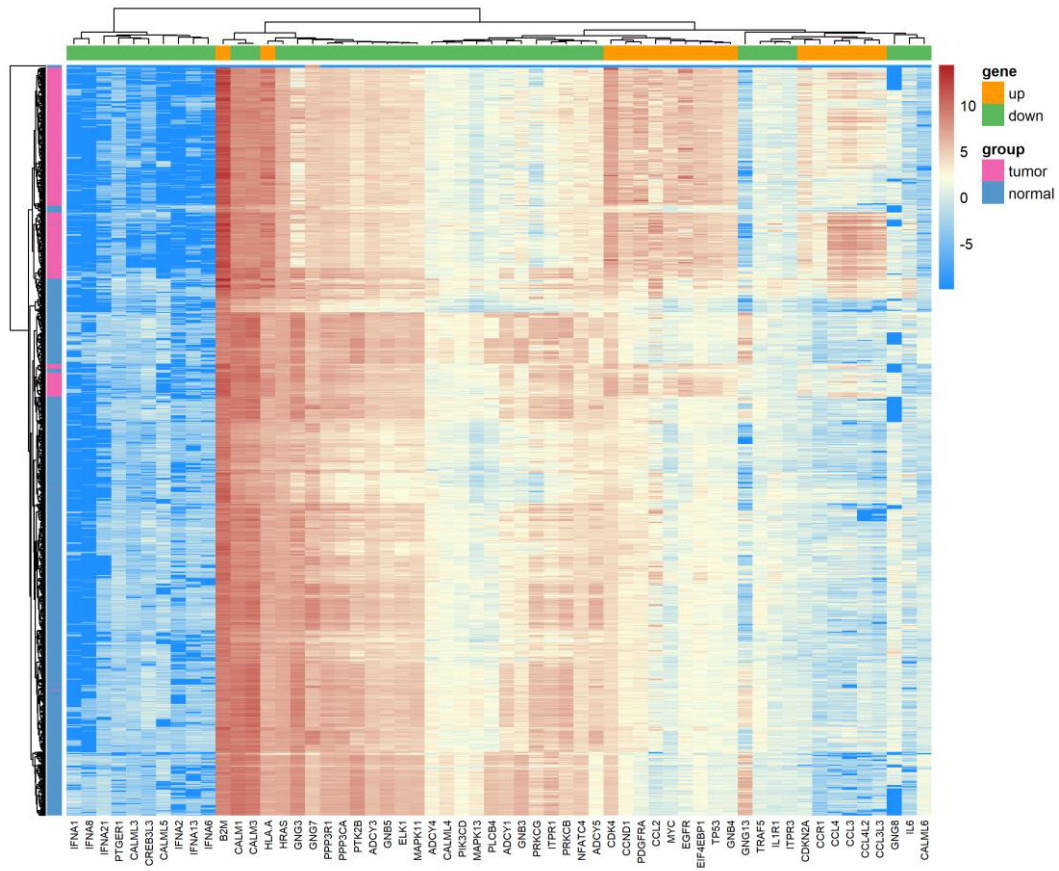

N

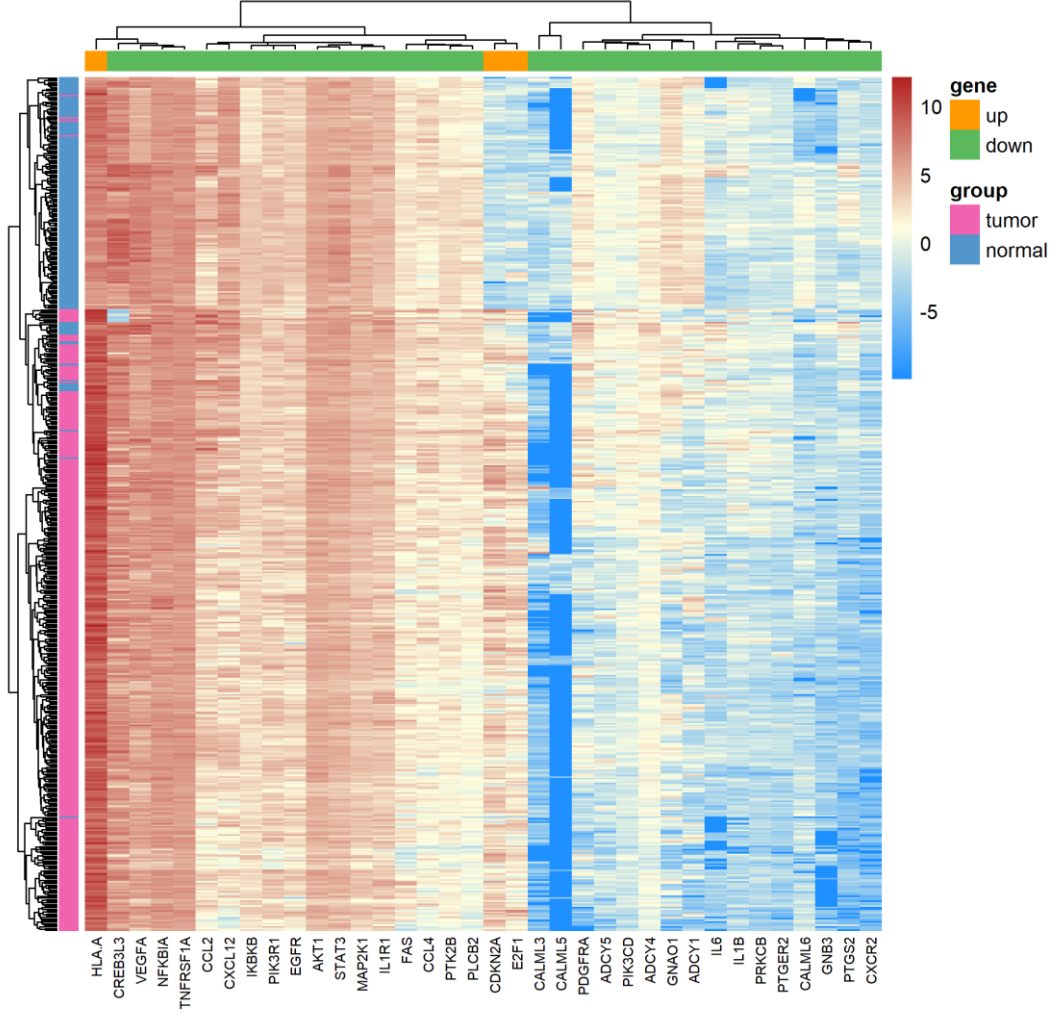

O

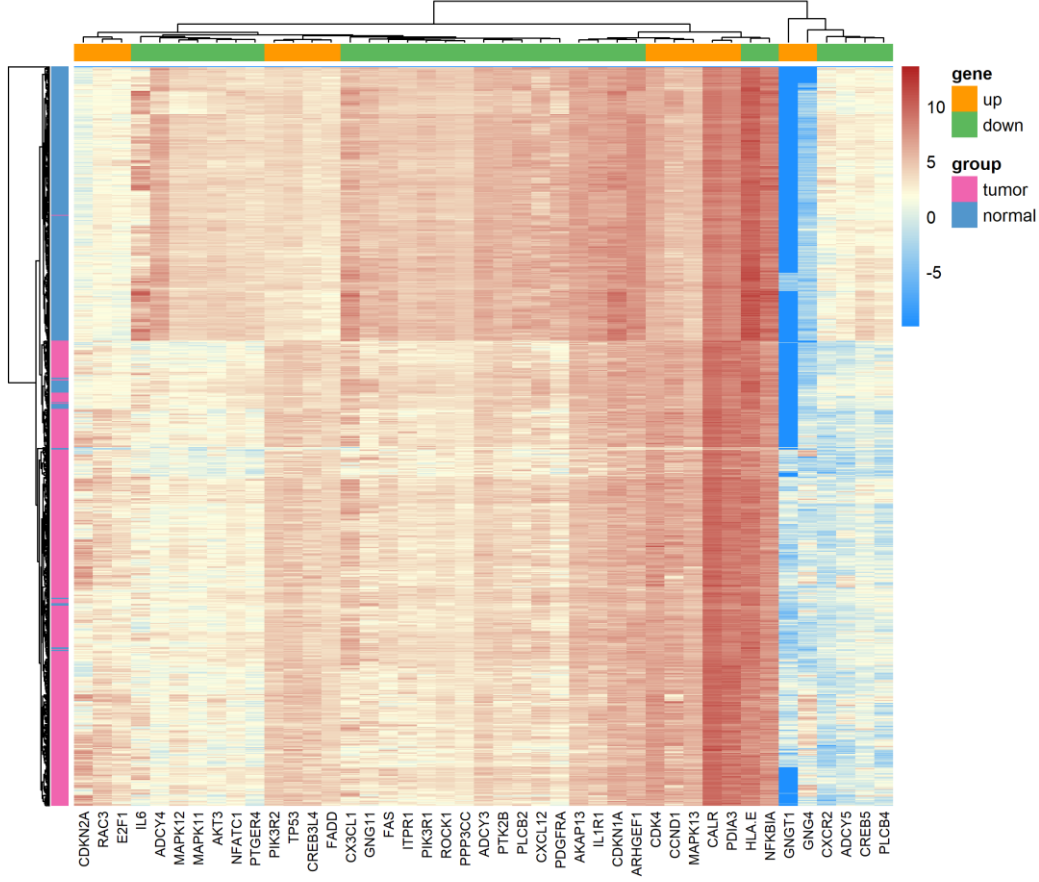



Q

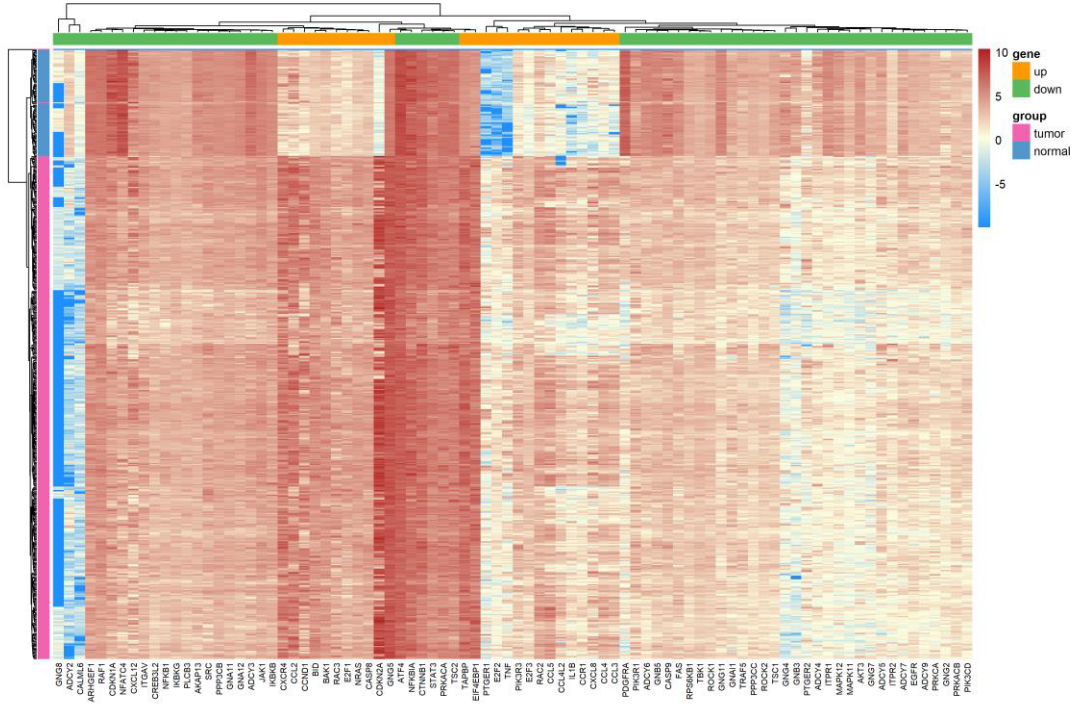

R

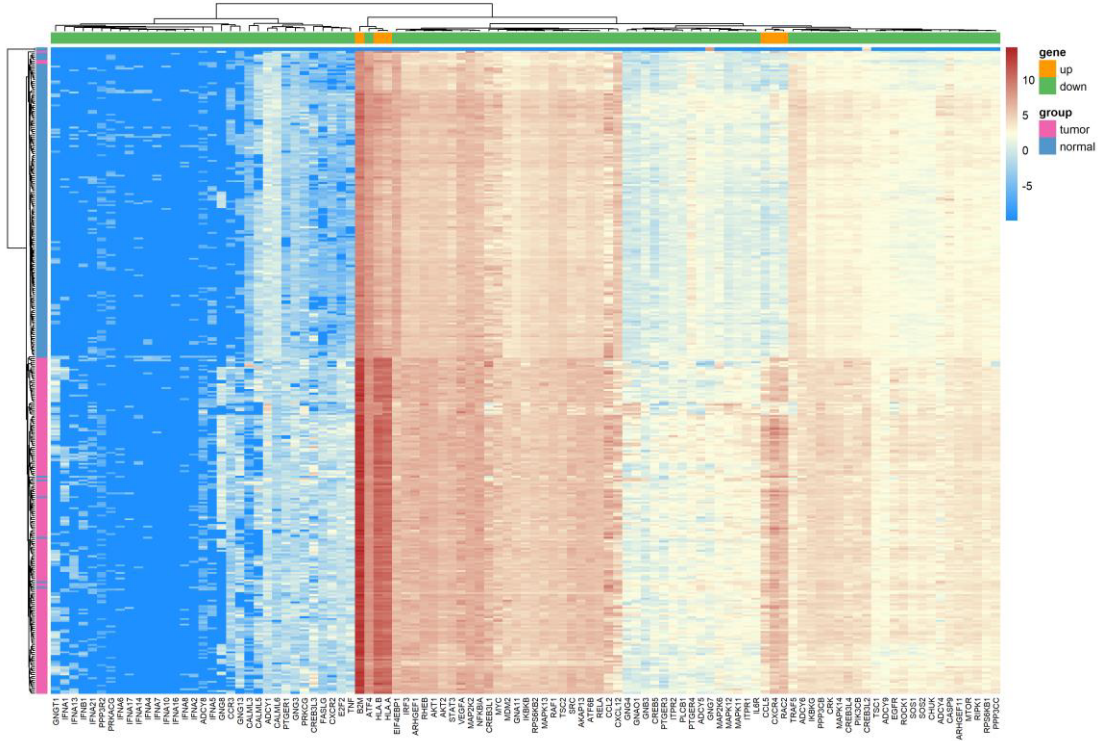

S

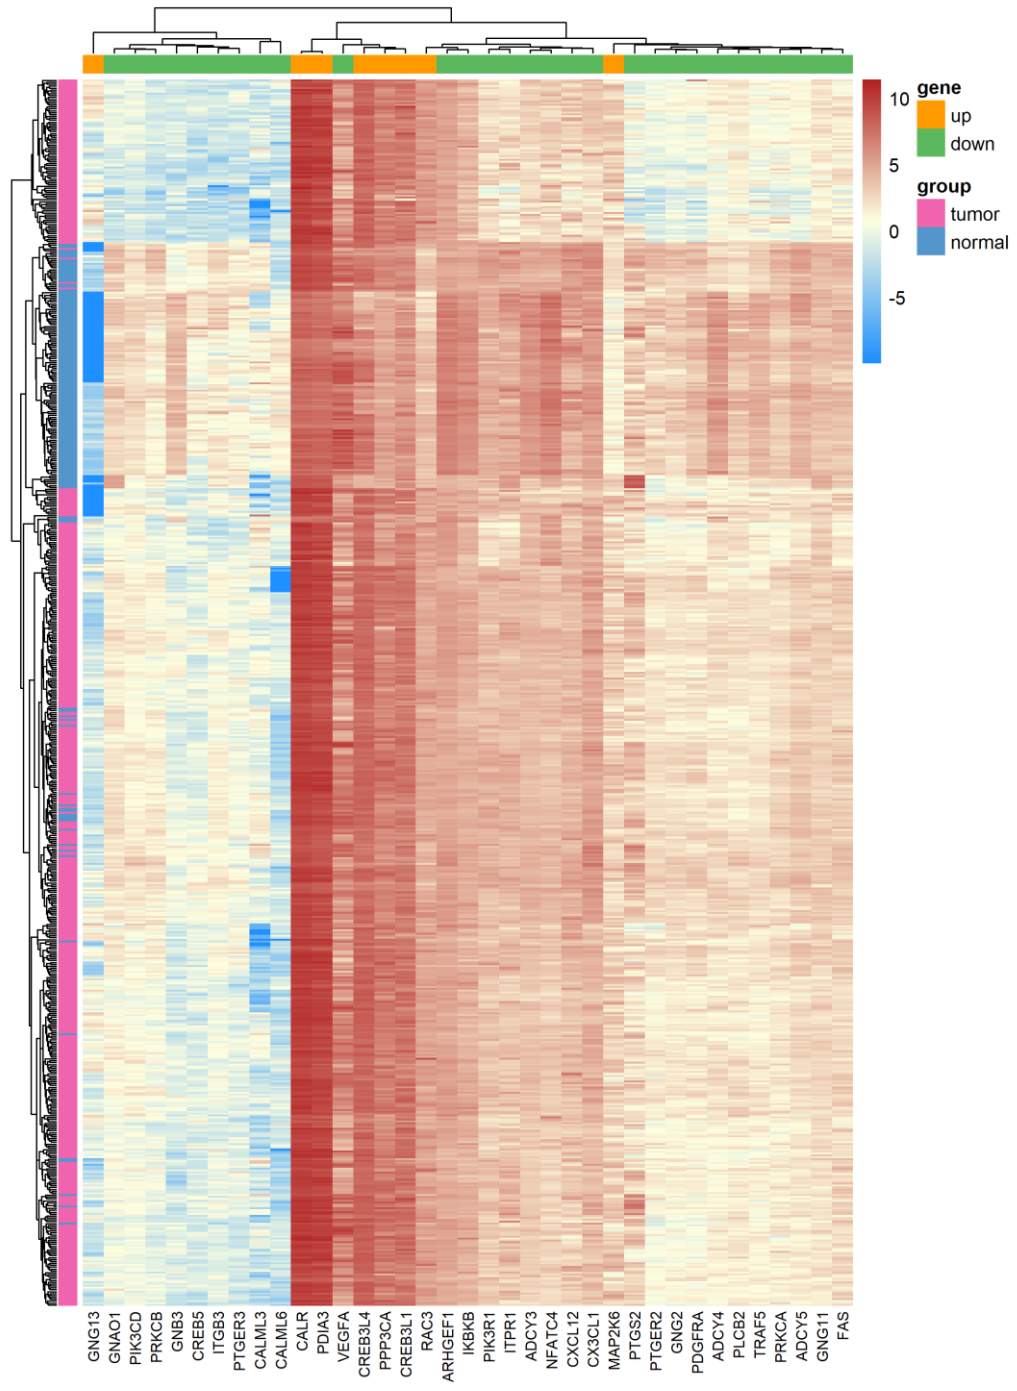

T

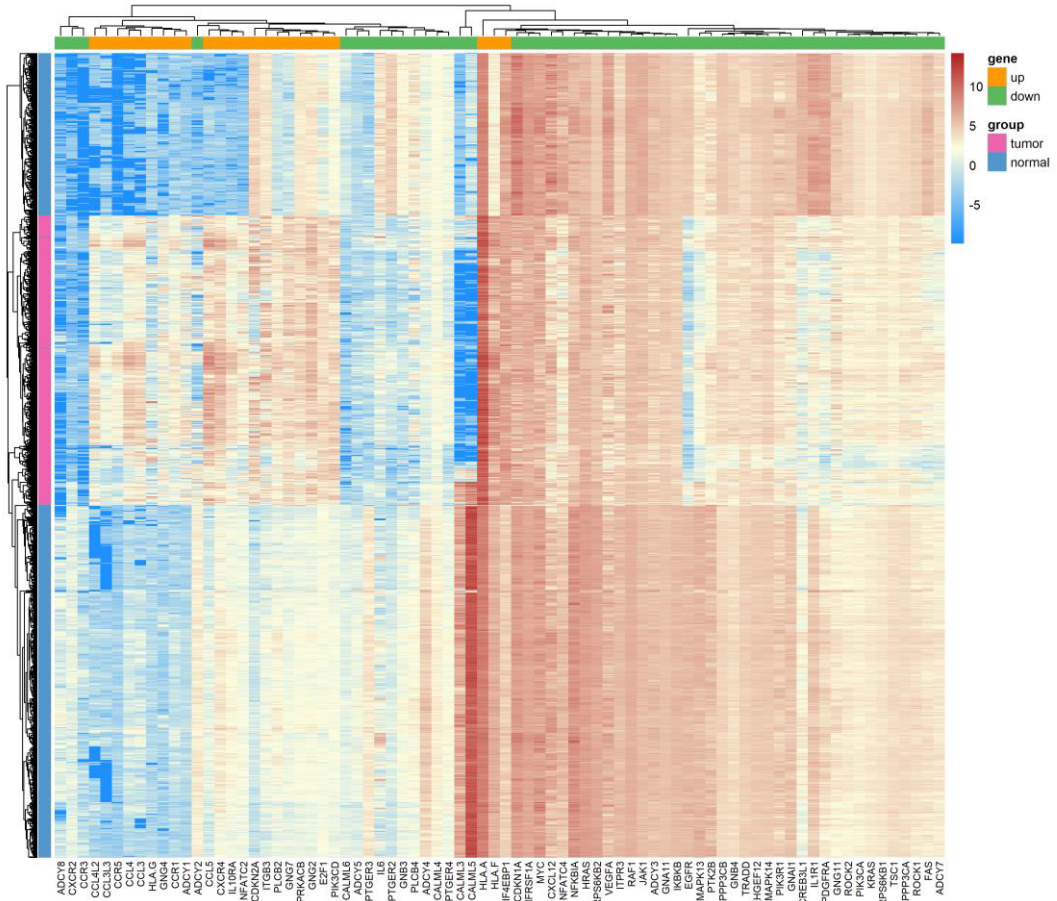

U

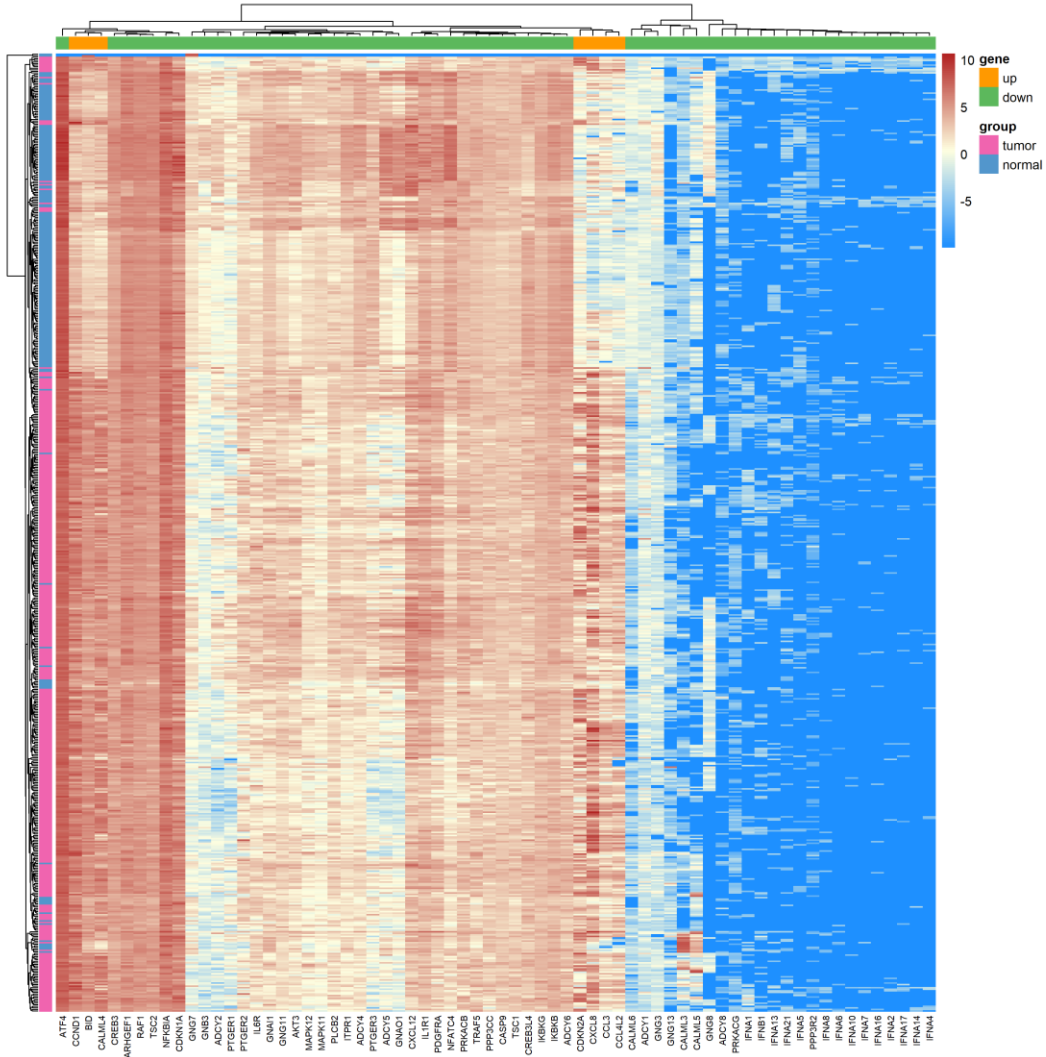

V

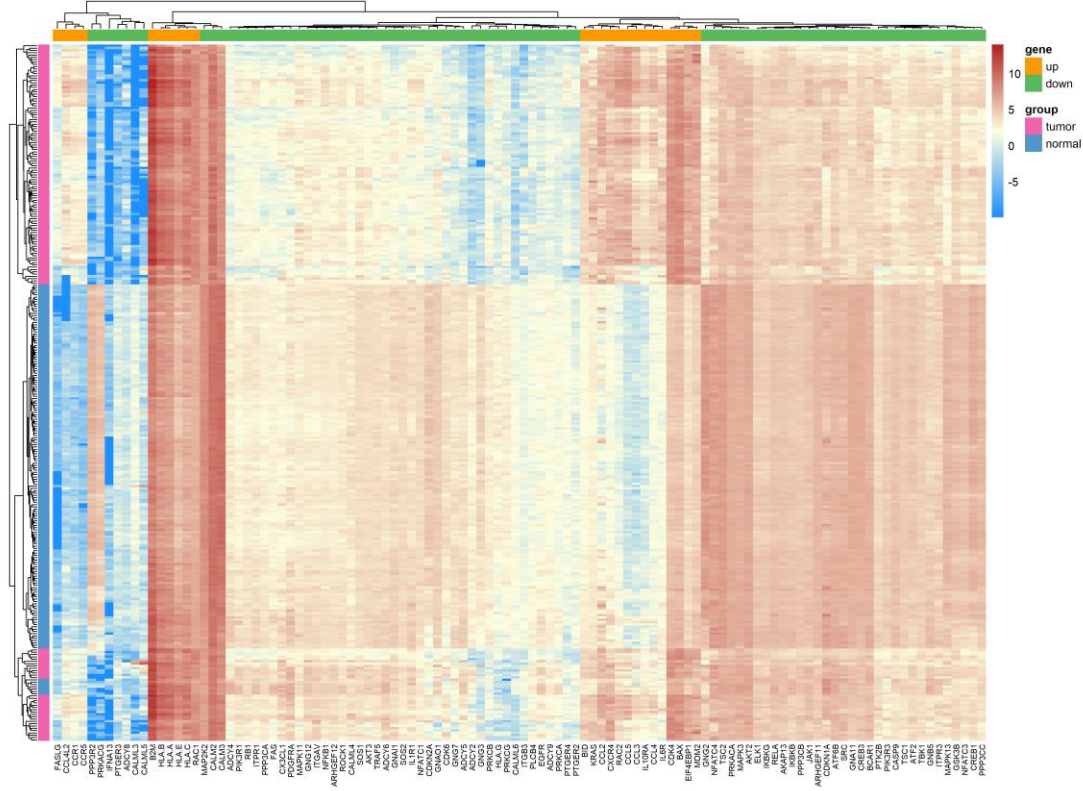

W

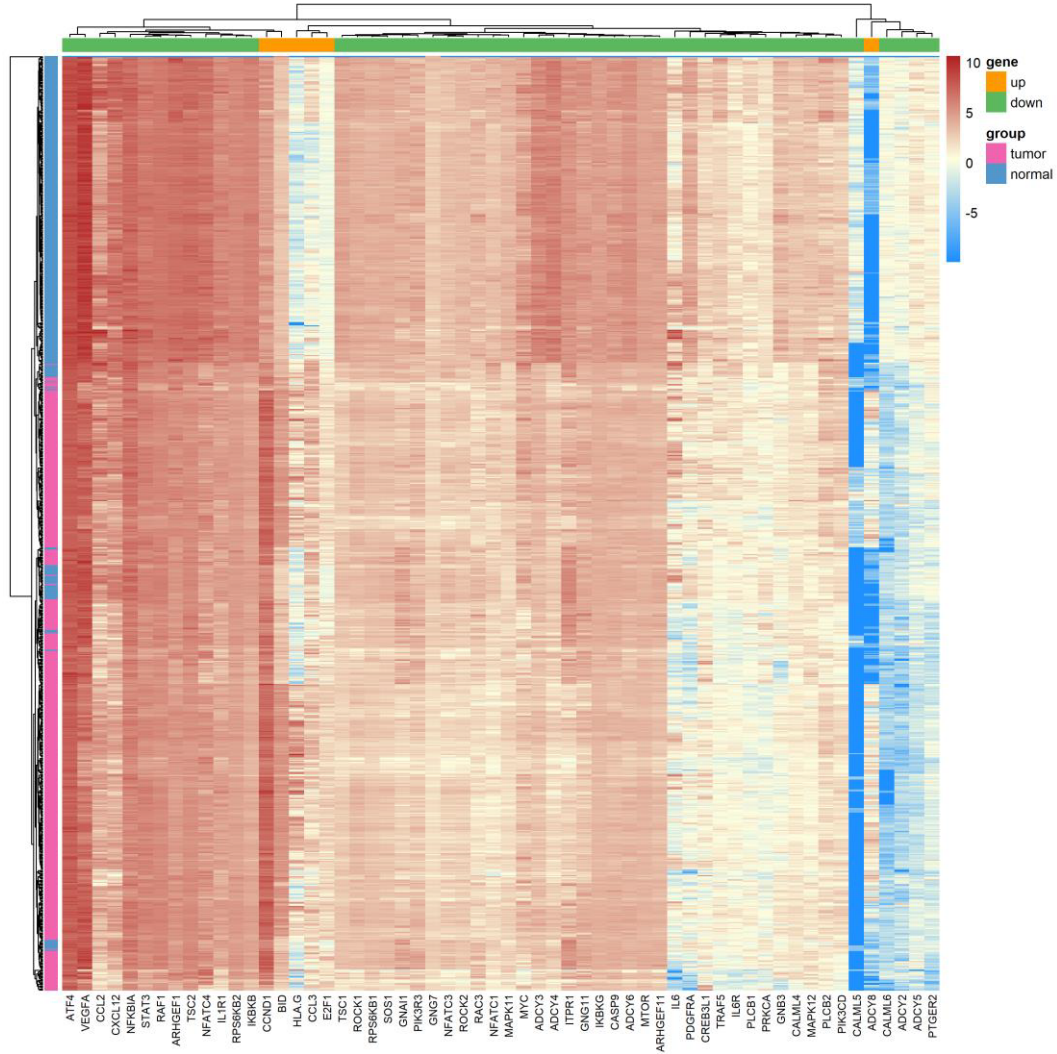

Supplement: MOESM9 [file 40246_2024_633_MOESM9_ESM.pdf]
