# Supplementary material for: Comprehensive bioinformatics analysis of human cytomegalovirus pathway genes in pan-cancer
Source: Springer Nature journal article supplement (doi:10.1186/s40246-024-00633-5), 2024-06-17
Supplement: MOESM4 [file 40246_2024_633_MOESM4_ESM.pdf]

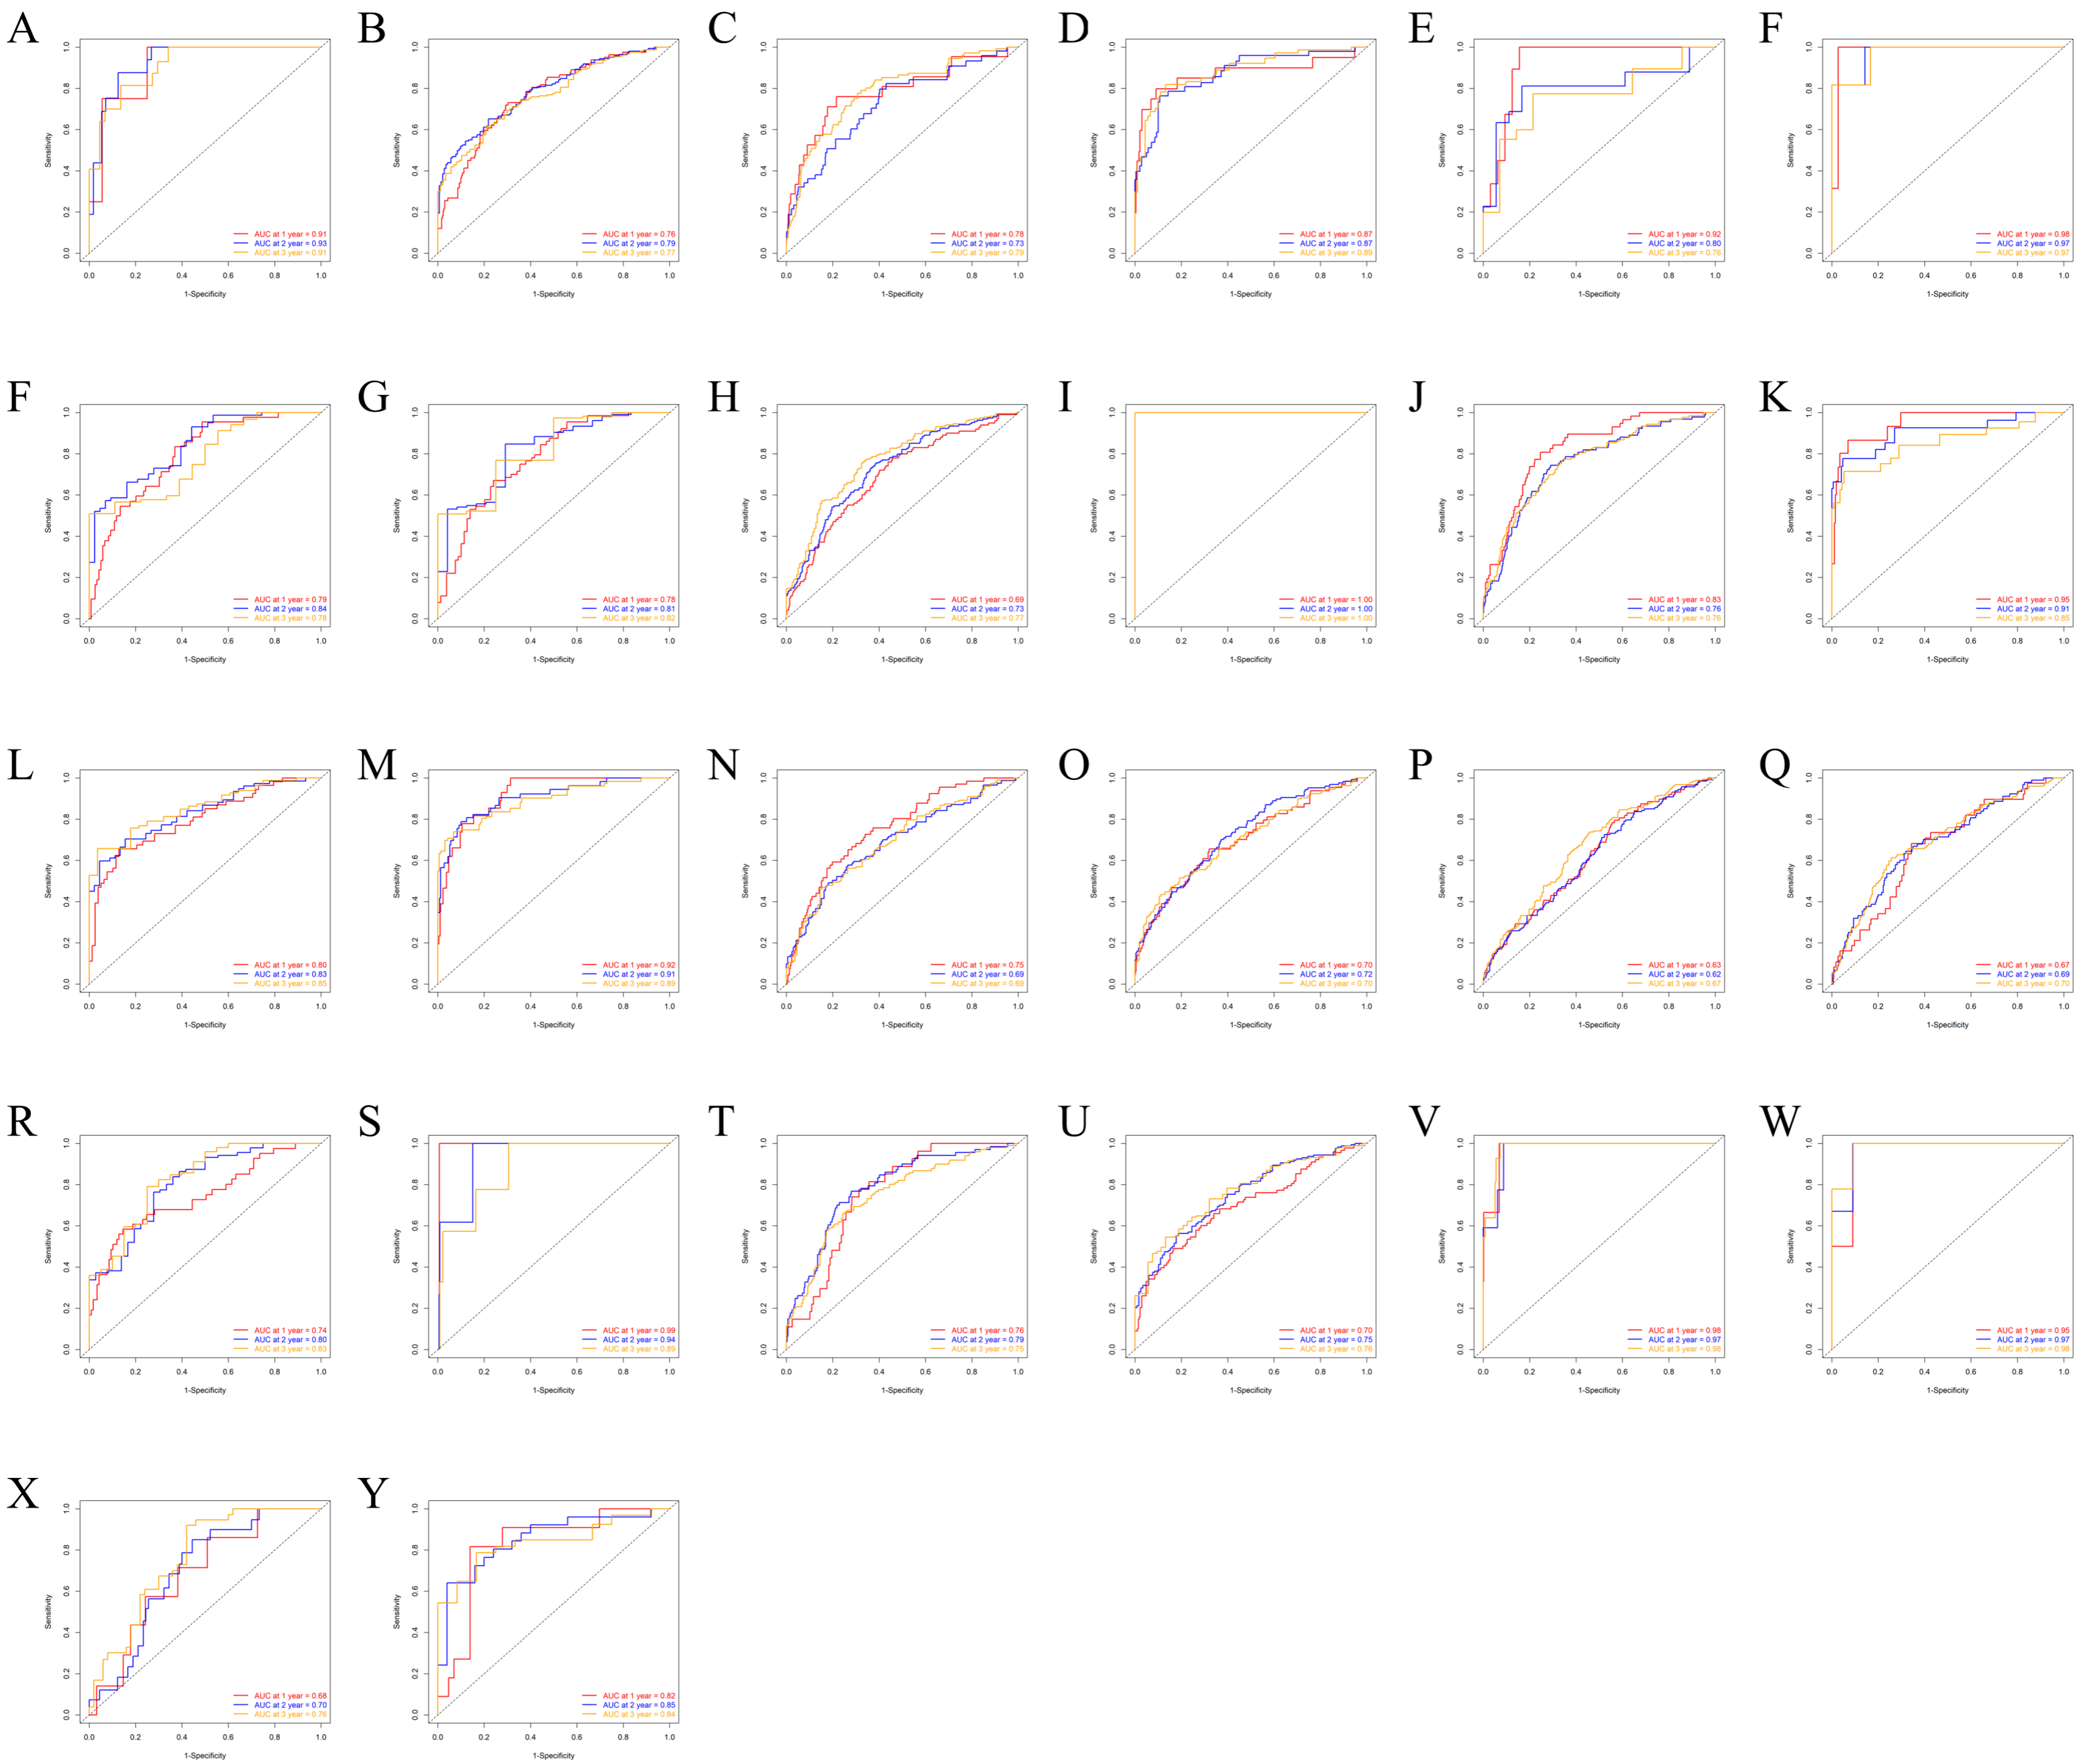

The diagnostic value of prognostic genes for (A) ACC, (B) BLCA, (C) BRCA, (D) CHOL, (E) DLBC, (F) ESCA, (G) GBM, (H) HNSC, (I) KICH, (J) KIRC, (K) KIRP, (L) LAML, (M) LGG, (N) LIHC, (O) LUAD, (P) LUSC, (Q) OV, (R) PAAD, (S) PRAD, (T) SKCM, (U) STAD, (V) THCA, (W) THYM, (X) UCEC, and (Y) UCS. AUC: Area Under the Curve.
