# Supplementary material for: Comprehensive bioinformatics analysis of human cytomegalovirus pathway genes in pan-cancer
Source: Springer Nature journal article supplement (doi:10.1186/s40246-024-00633-5), 2024-06-17
Supplement: MOESM5 [file 40246_2024_633_MOESM5_ESM.pdf]

A

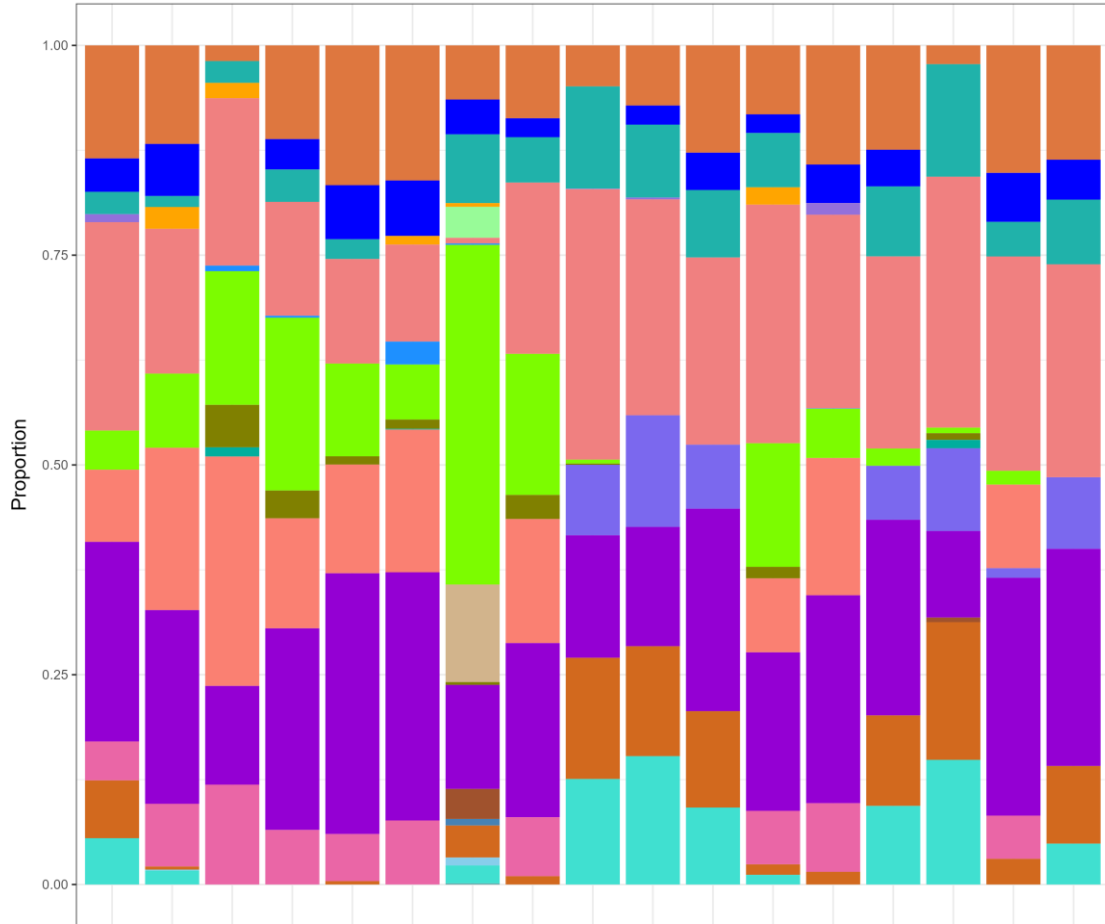

- B cells memory
- Macrophages M0
- Monocytes
- T cells CD4 memory activated
- T cells gamma delta
- B cells naive
- Macrophages M1
- Neutrophils
- T cells CD4 memory resting
- T cells regulatory Tregs
- Dendritic cells activated
- Macrophages M2
- NK cells activated
- T cells CD4 naive
- Dendritic cells resting
- Mast cells activated
- NK cells resting
- T cells CD8
- Eosinophils
- Mast cells resting
- Plasma cells
- T cells follicular helper

**B**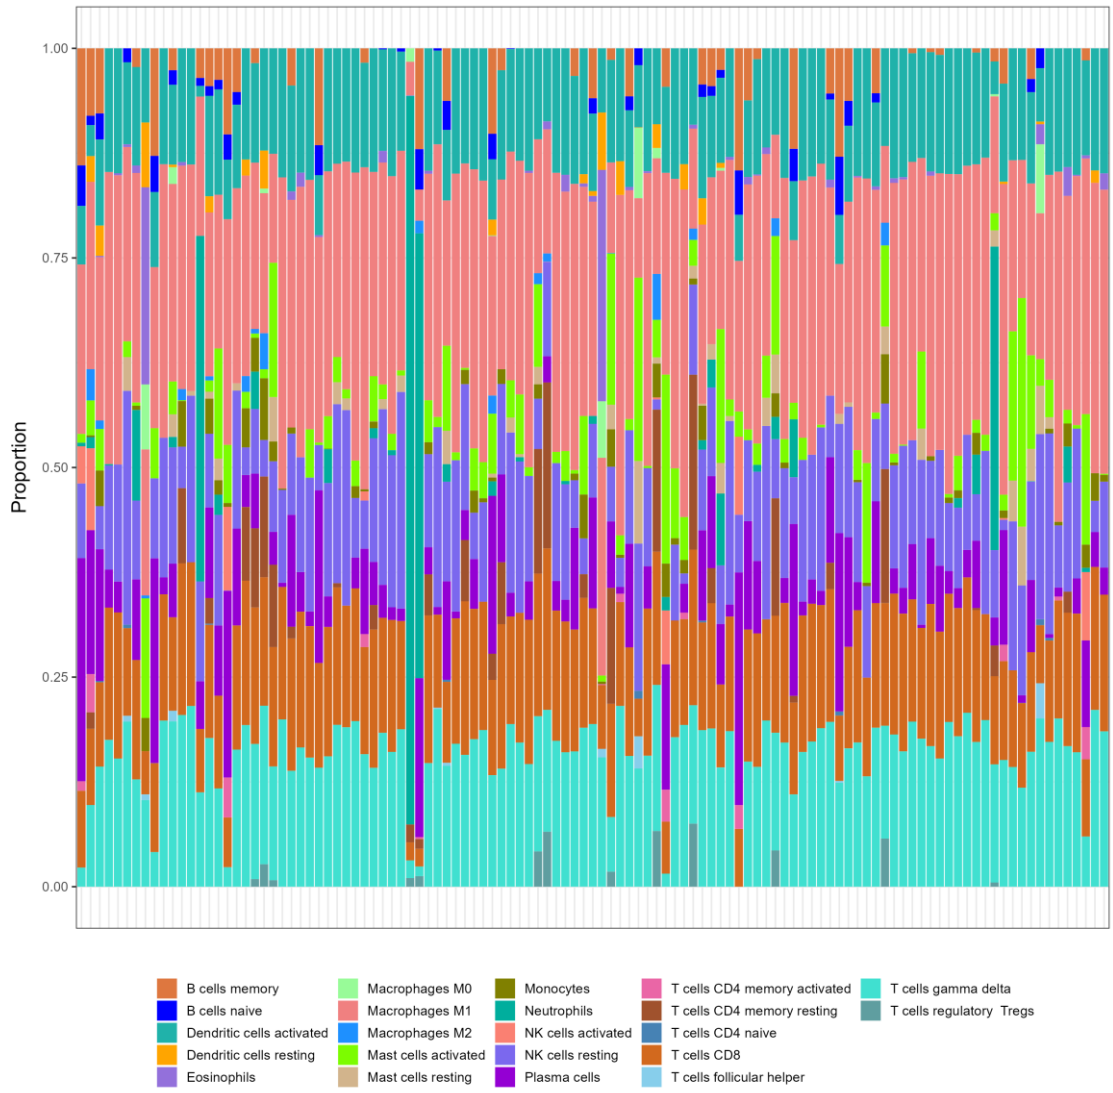

**C**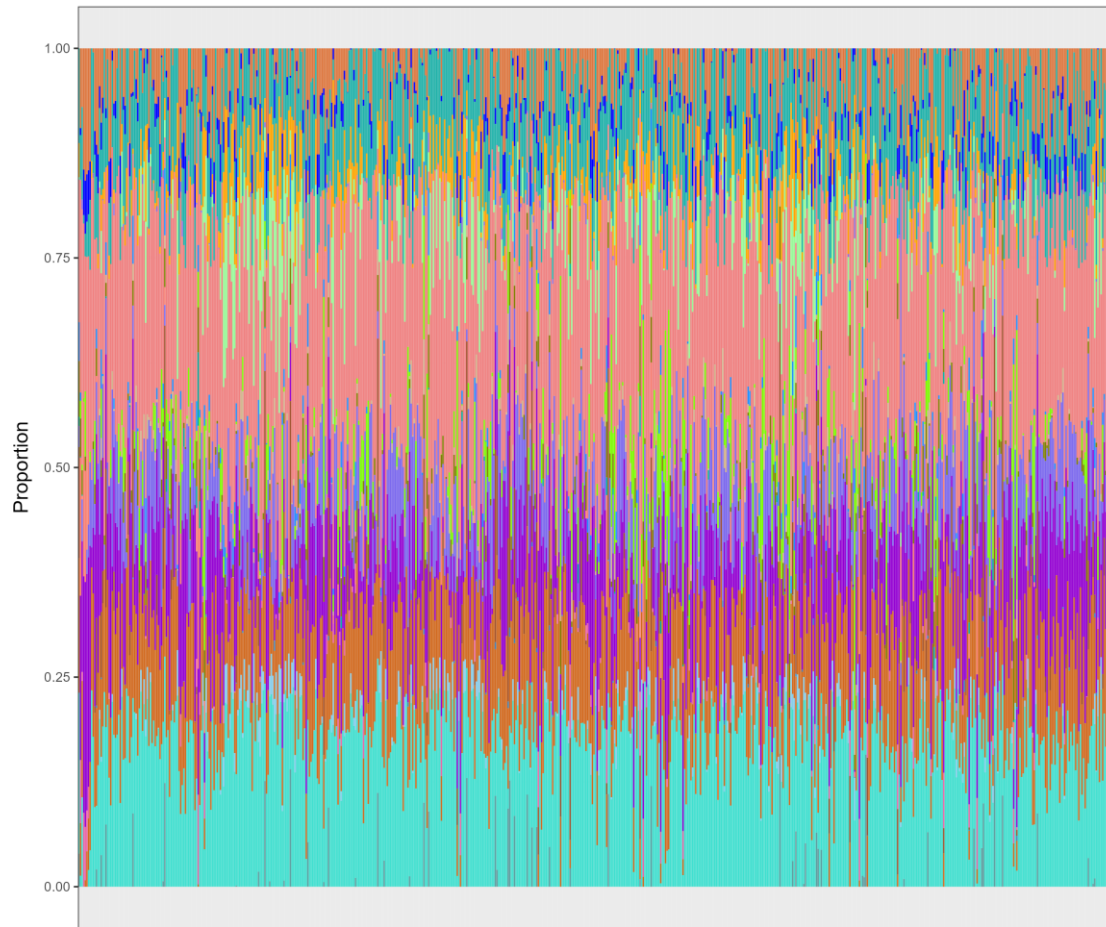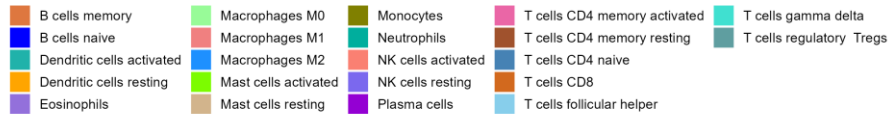

**D**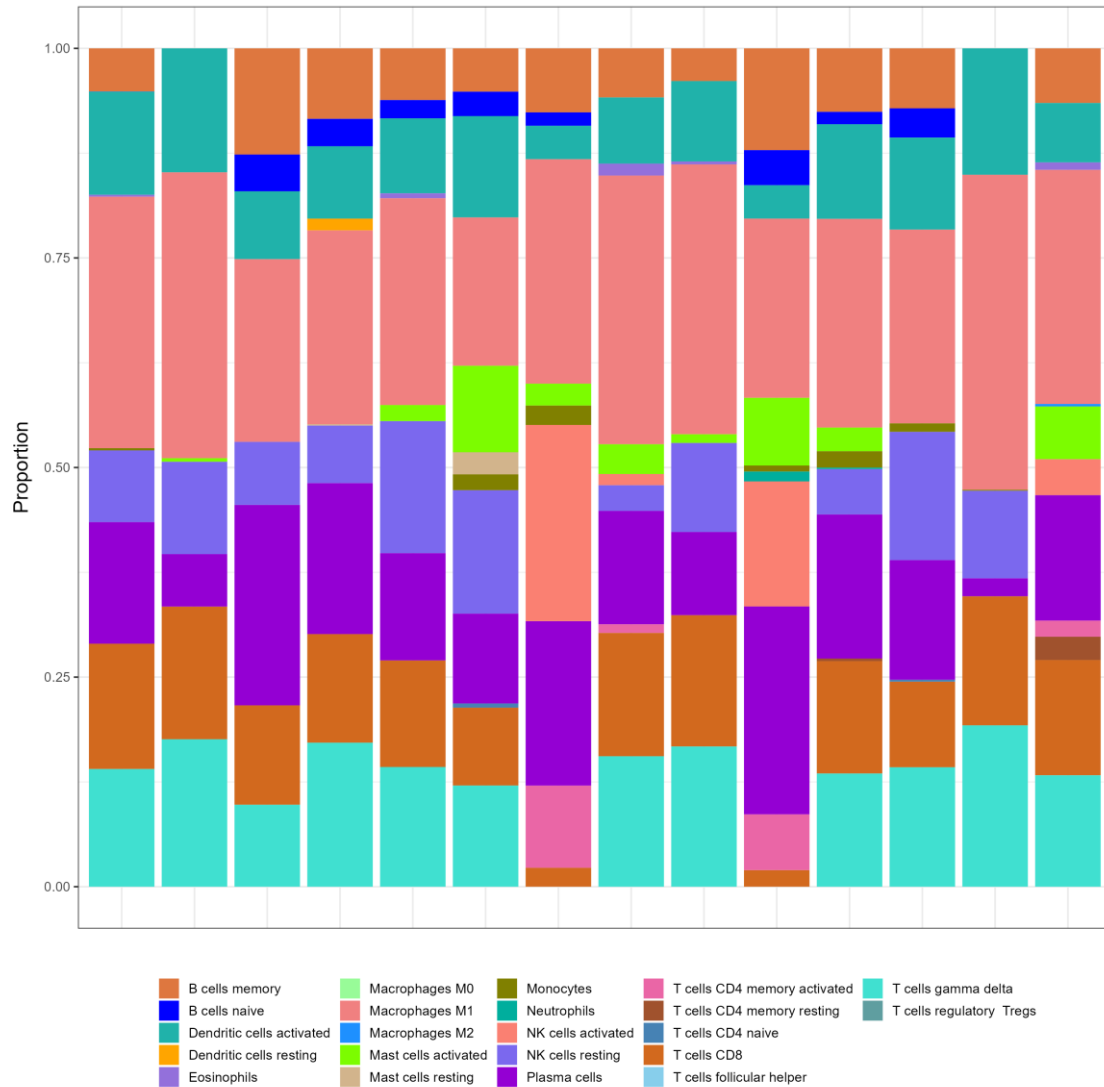

**E**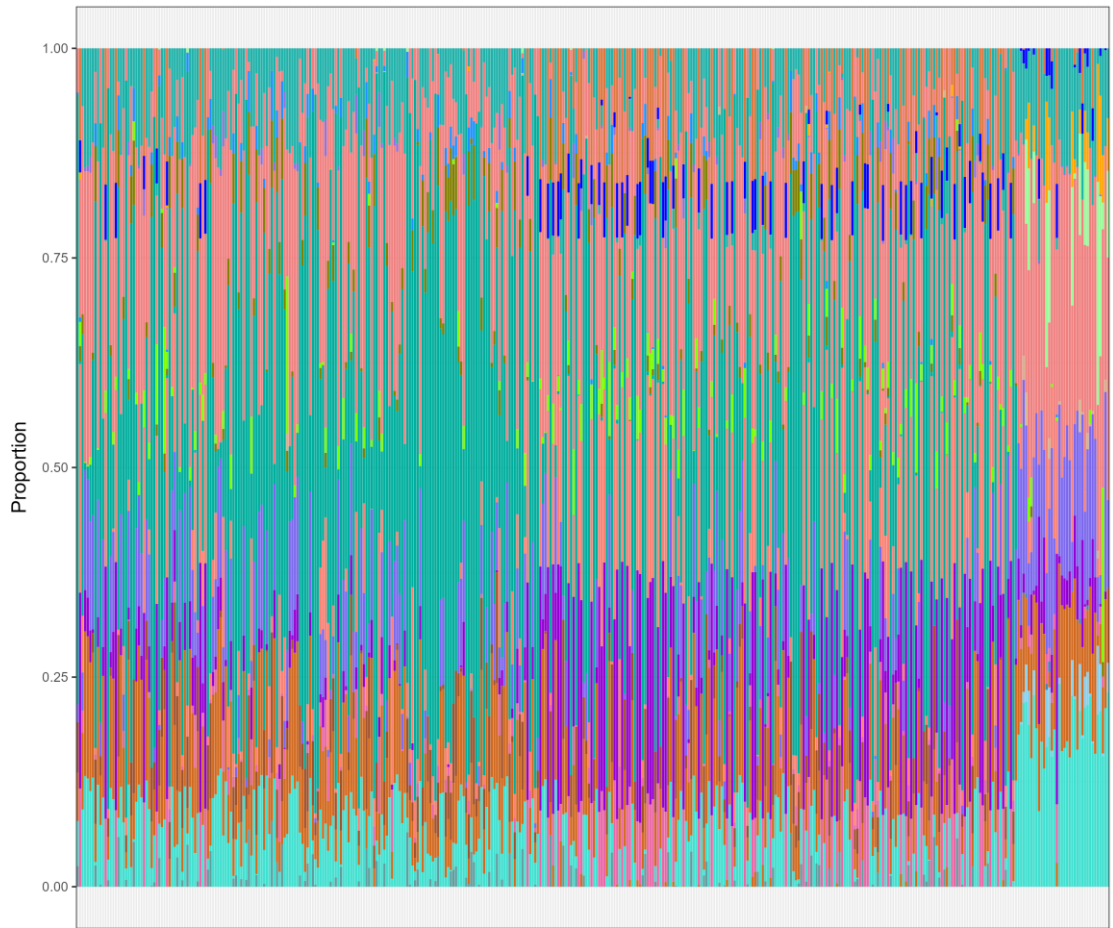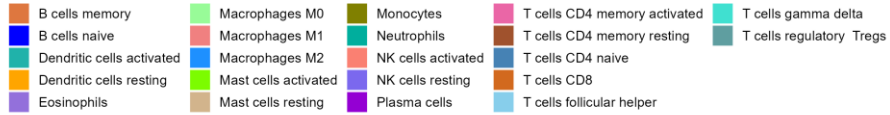

**F**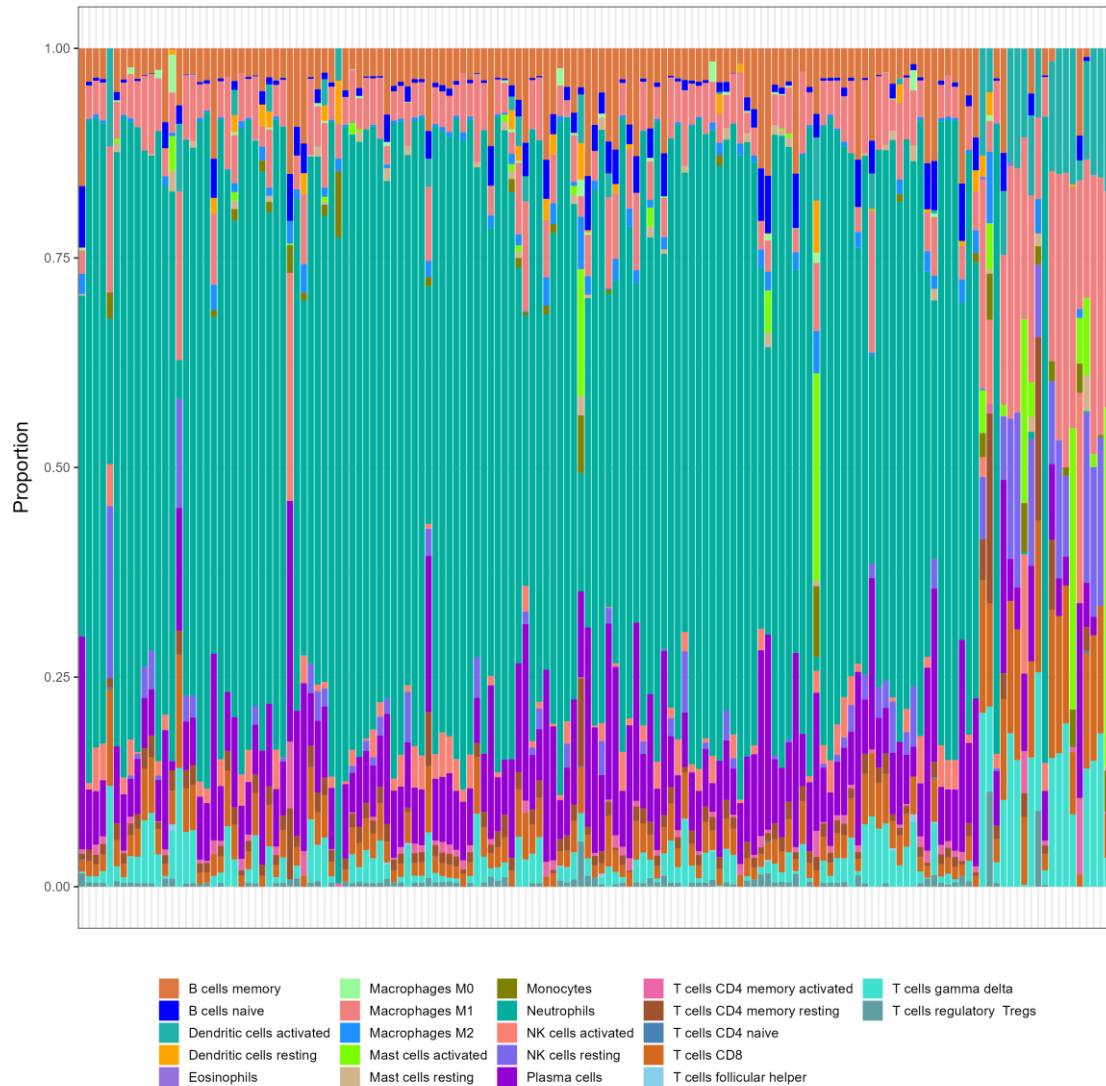

**G**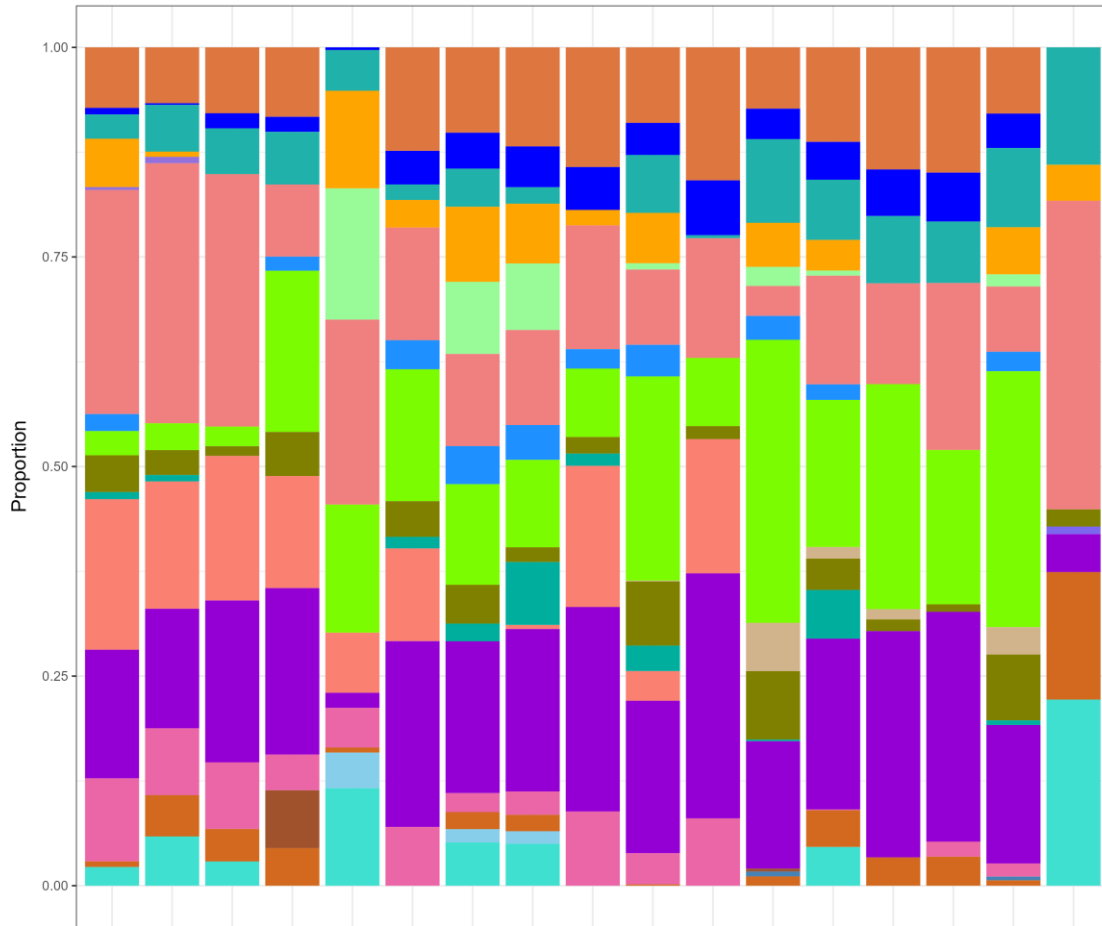

|                           |                      |                    |                              |                          |
|---------------------------|----------------------|--------------------|------------------------------|--------------------------|
| B cells memory            | Macrophages M0       | Monocytes          | T cells CD4 memory activated | T cells gamma delta      |
| B cells naive             | Macrophages M1       | Neutrophils        | T cells CD4 memory resting   | T cells regulatory Tregs |
| Dendritic cells activated | Macrophages M2       | NK cells activated | T cells CD4 naive            |                          |
| Dendritic cells resting   | Mast cells activated | NK cells resting   | T cells CD8                  |                          |
| Eosinophils               | Mast cells resting   | Plasma cells       | T cells follicular helper    |                          |

**H**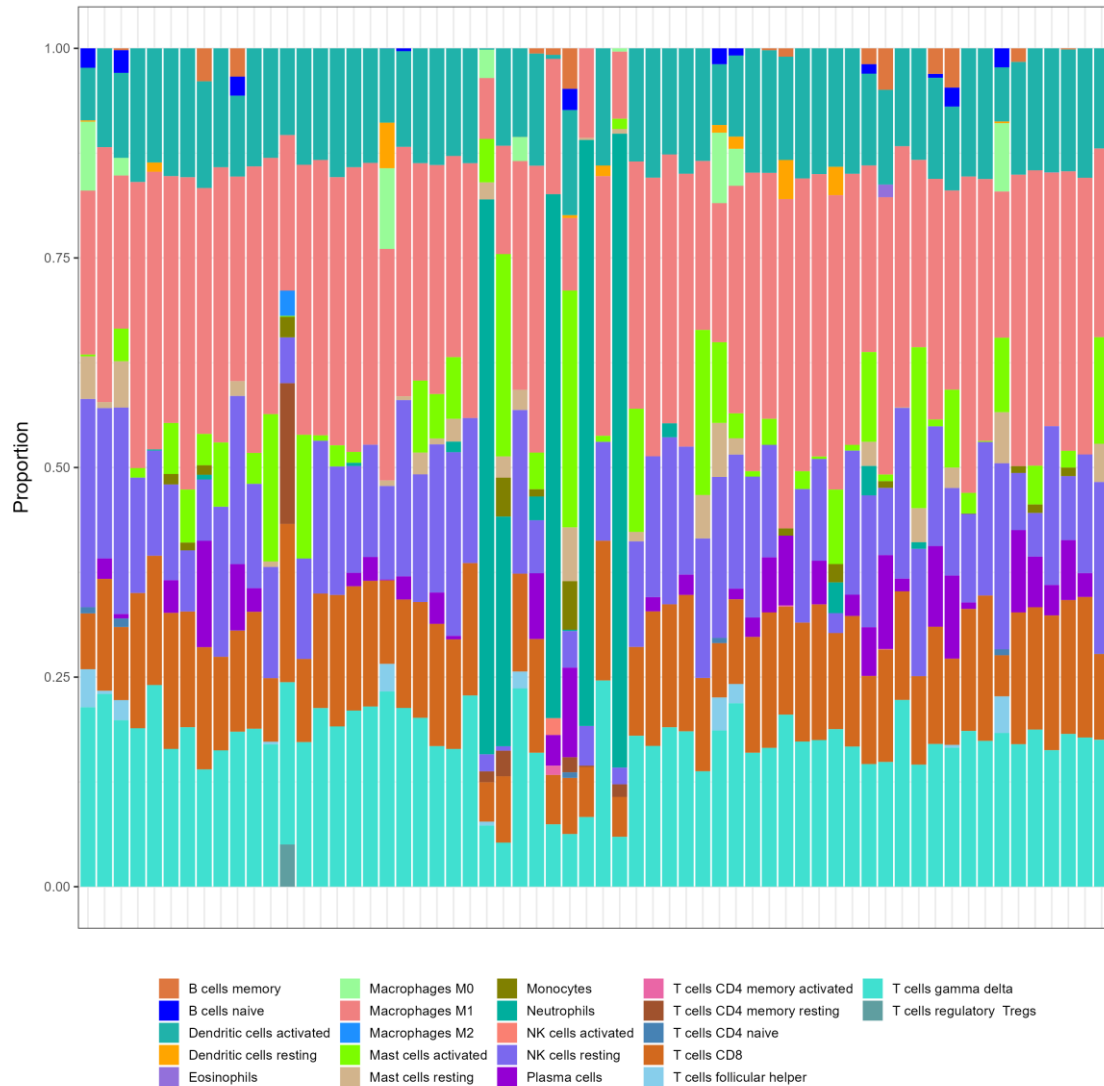

**I**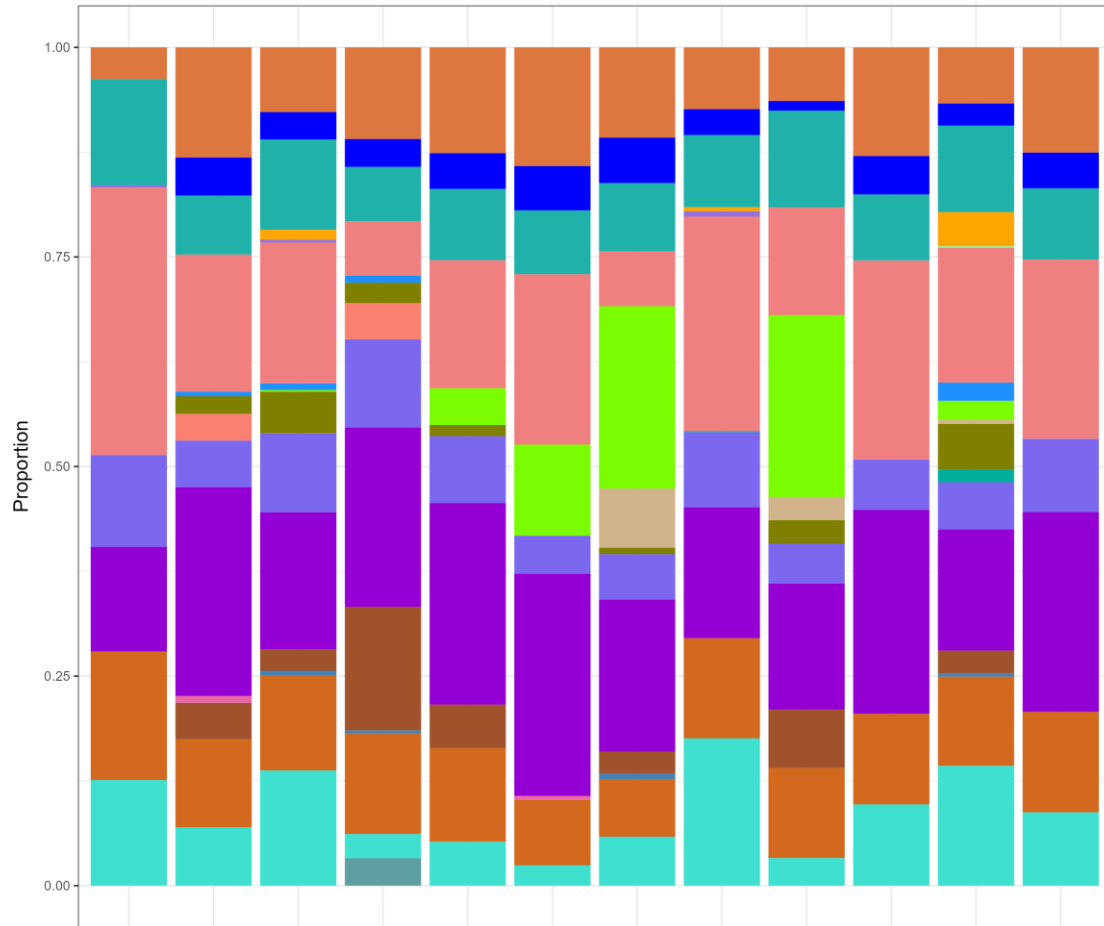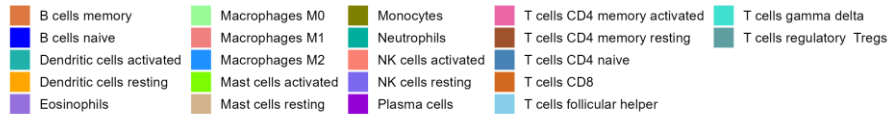

**J**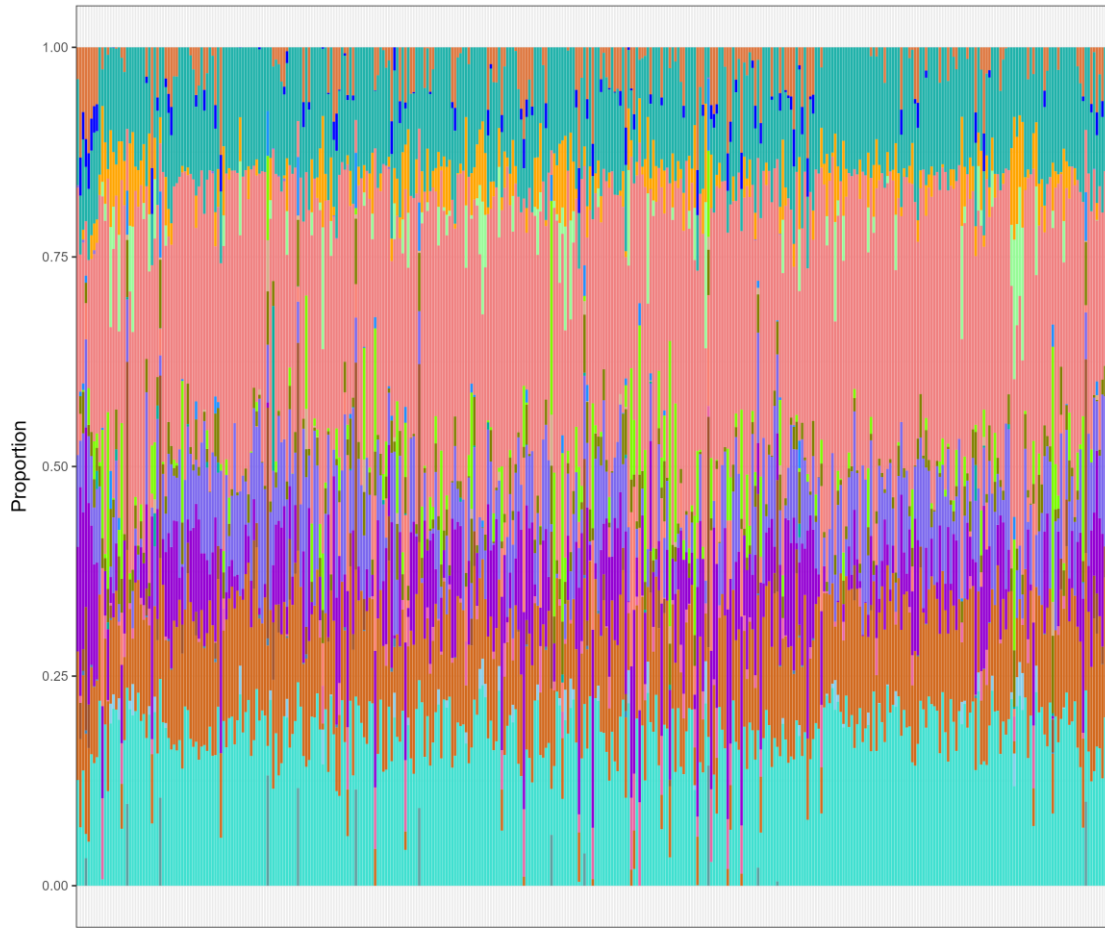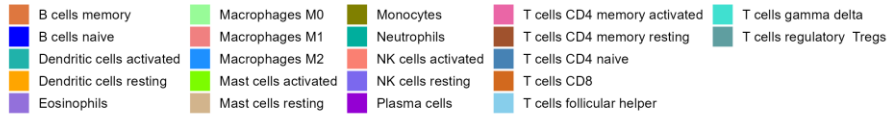

**K**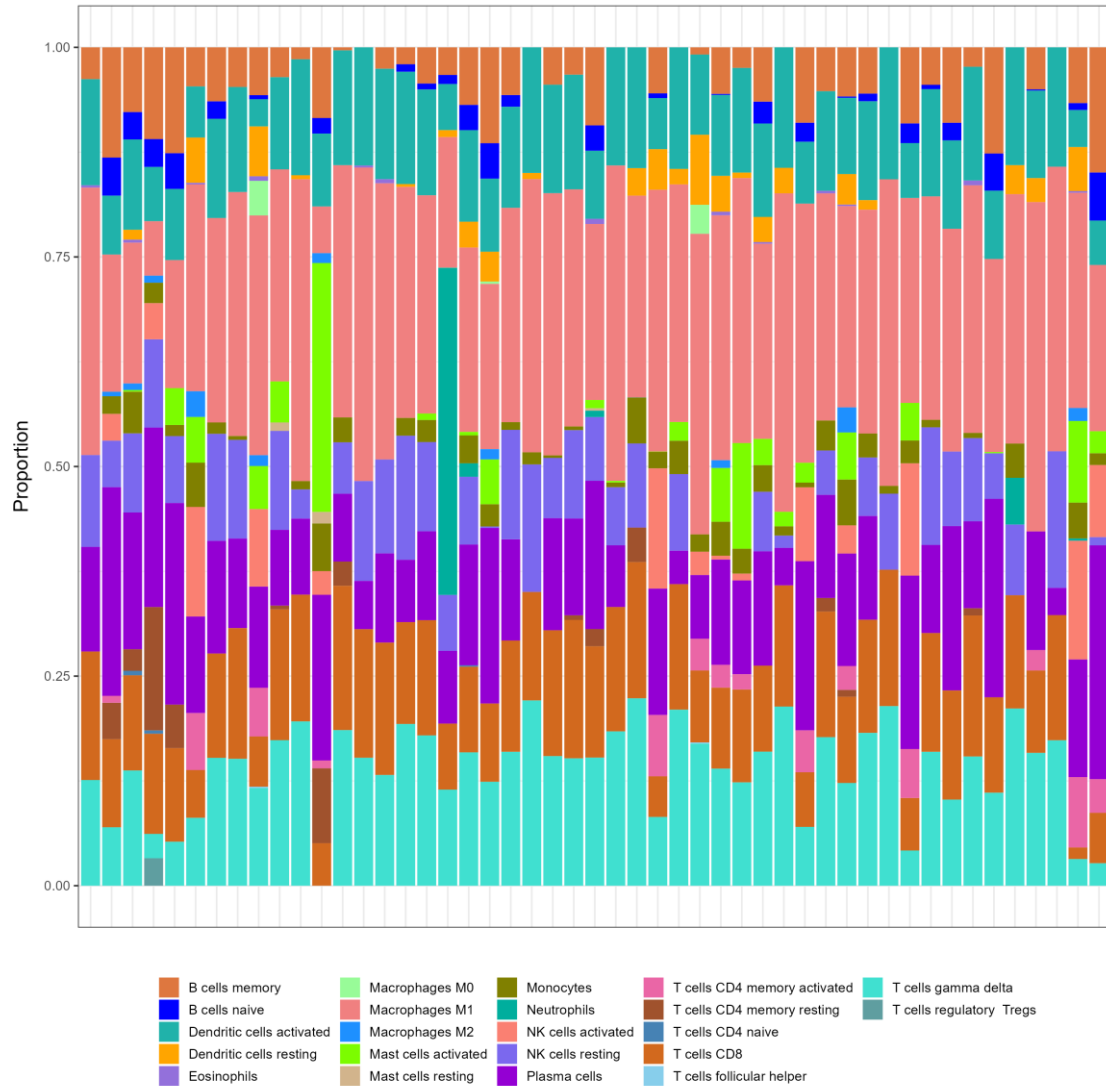

**L**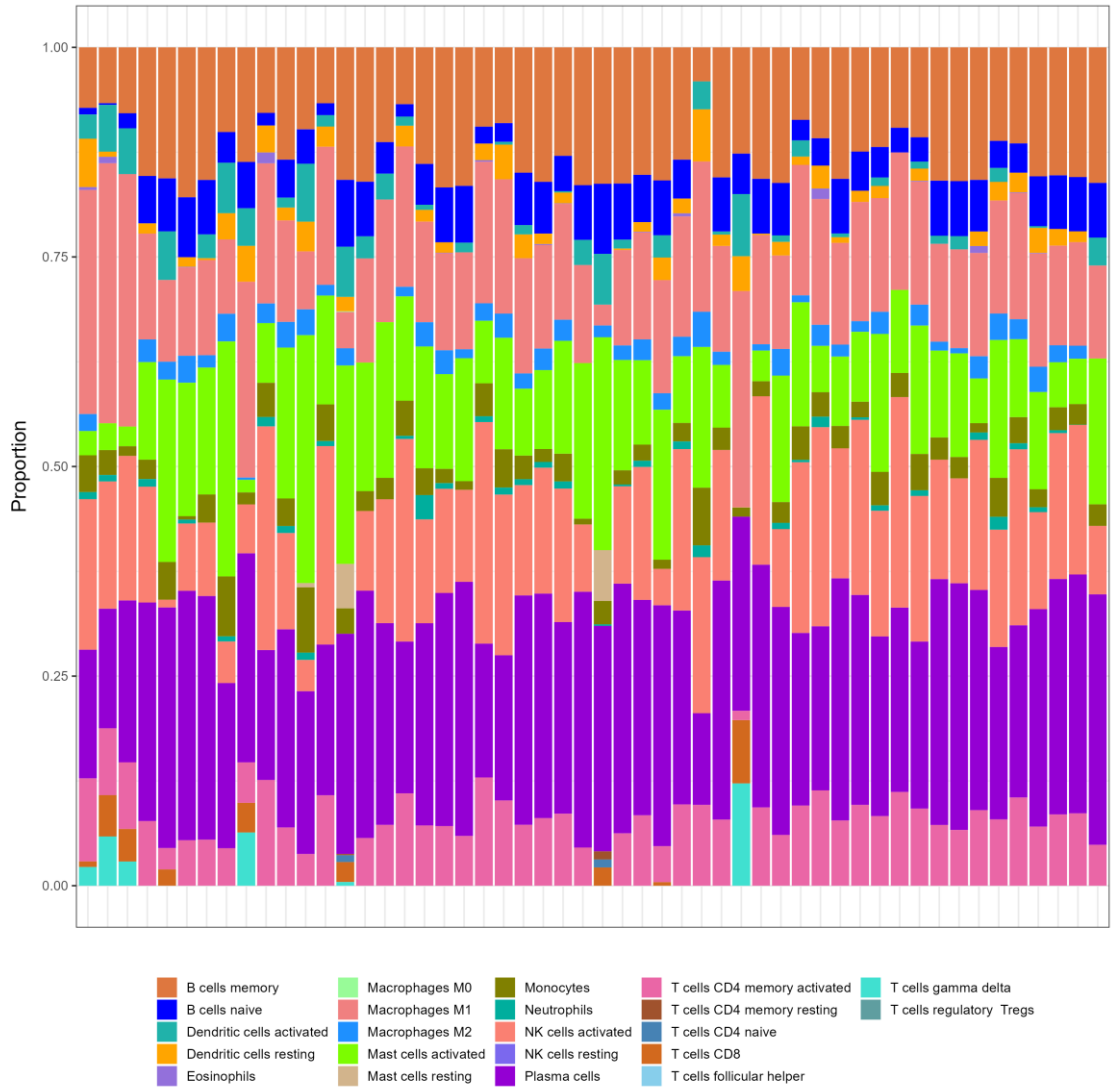

**M**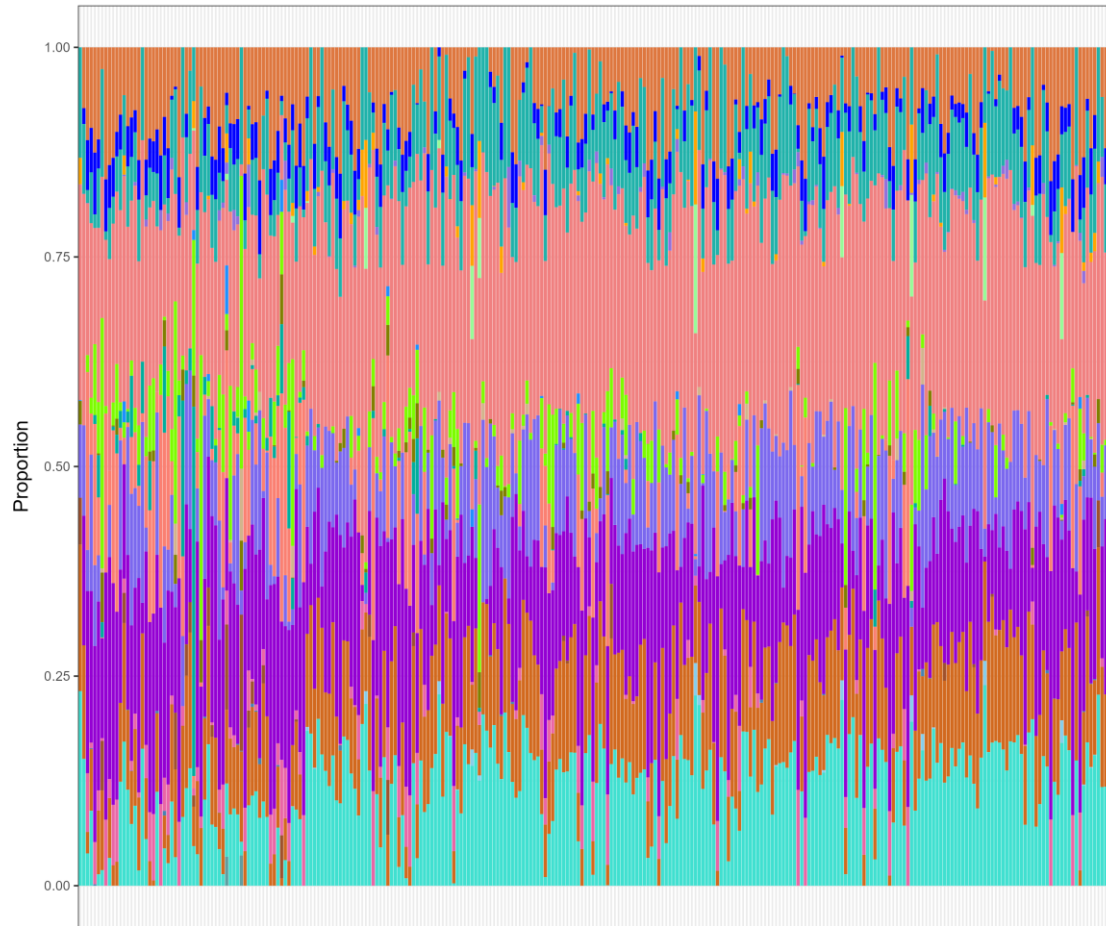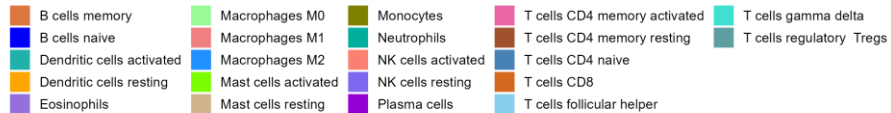

N

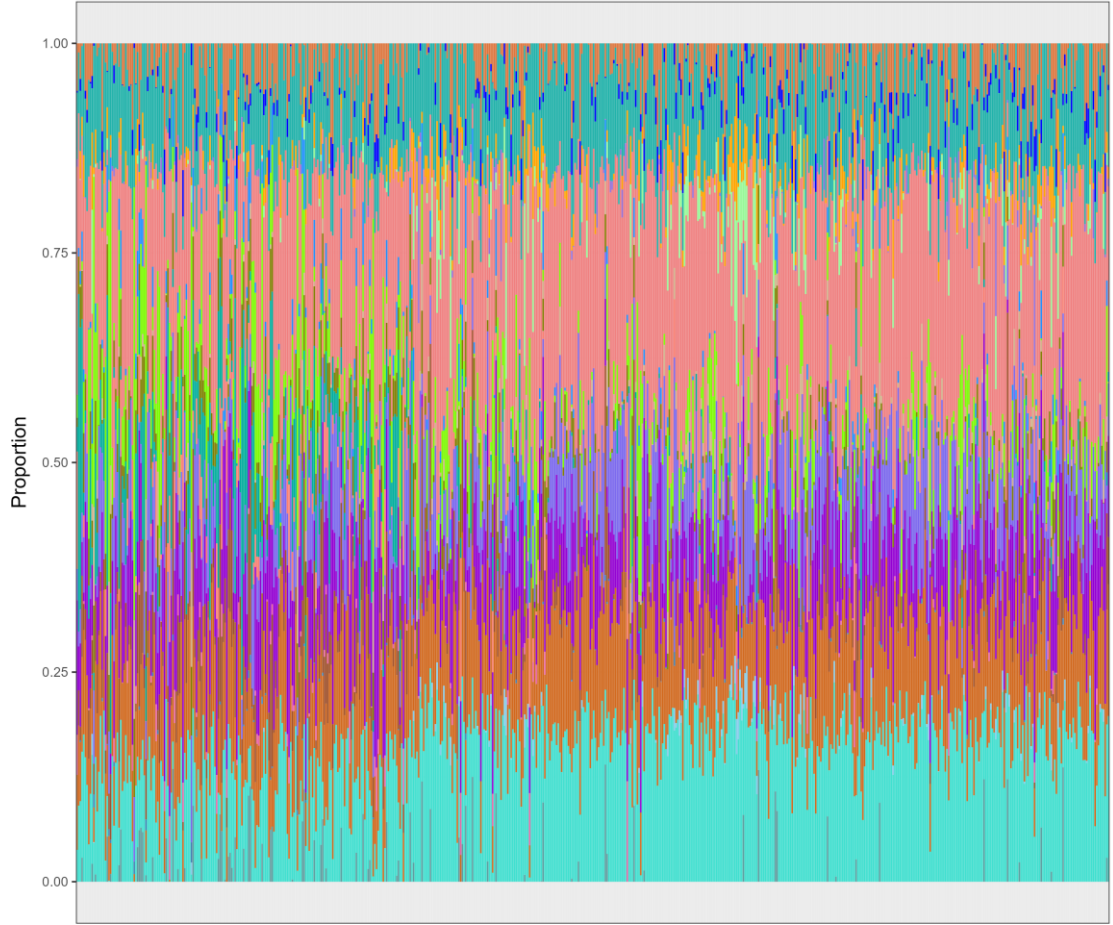

- |                                                                  |                                                             |                                                           |                                                                     |                                                                 |
|------------------------------------------------------------------|-------------------------------------------------------------|-----------------------------------------------------------|---------------------------------------------------------------------|-----------------------------------------------------------------|
| <span style="color: #E67E22;">■</span> B cells memory            | <span style="color: #90EE90;">■</span> Macrophages M0       | <span style="color: #6B8E23;">■</span> Monocytes          | <span style="color: #E91E63;">■</span> T cells CD4 memory activated | <span style="color: #40E0D0;">■</span> T cells gamma delta      |
| <span style="color: #0000FF;">■</span> B cells naive             | <span style="color: #F08080;">■</span> Macrophages M1       | <span style="color: #008080;">■</span> Neutrophils        | <span style="color: #8B4513;">■</span> T cells CD4 memory resting   | <span style="color: #2F4F4F;">■</span> T cells regulatory Tregs |
| <span style="color: #008080;">■</span> Dendritic cells activated | <span style="color: #0000FF;">■</span> Macrophages M2       | <span style="color: #FF4500;">■</span> NK cells activated | <span style="color: #4682B4;">■</span> T cells CD4 naive            |                                                                 |
| <span style="color: #FFA500;">■</span> Dendritic cells resting   | <span style="color: #90EE90;">■</span> Mast cells activated | <span style="color: #6A5ACD;">■</span> NK cells resting   | <span style="color: #D2691E;">■</span> T cells CD8                  |                                                                 |
| <span style="color: #8A2BE2;">■</span> Eosinophils               | <span style="color: #D2B48C;">■</span> Mast cells resting   | <span style="color: #800080;">■</span> Plasma cells       | <span style="color: #6495ED;">■</span> T cells follicular helper    |                                                                 |

**O**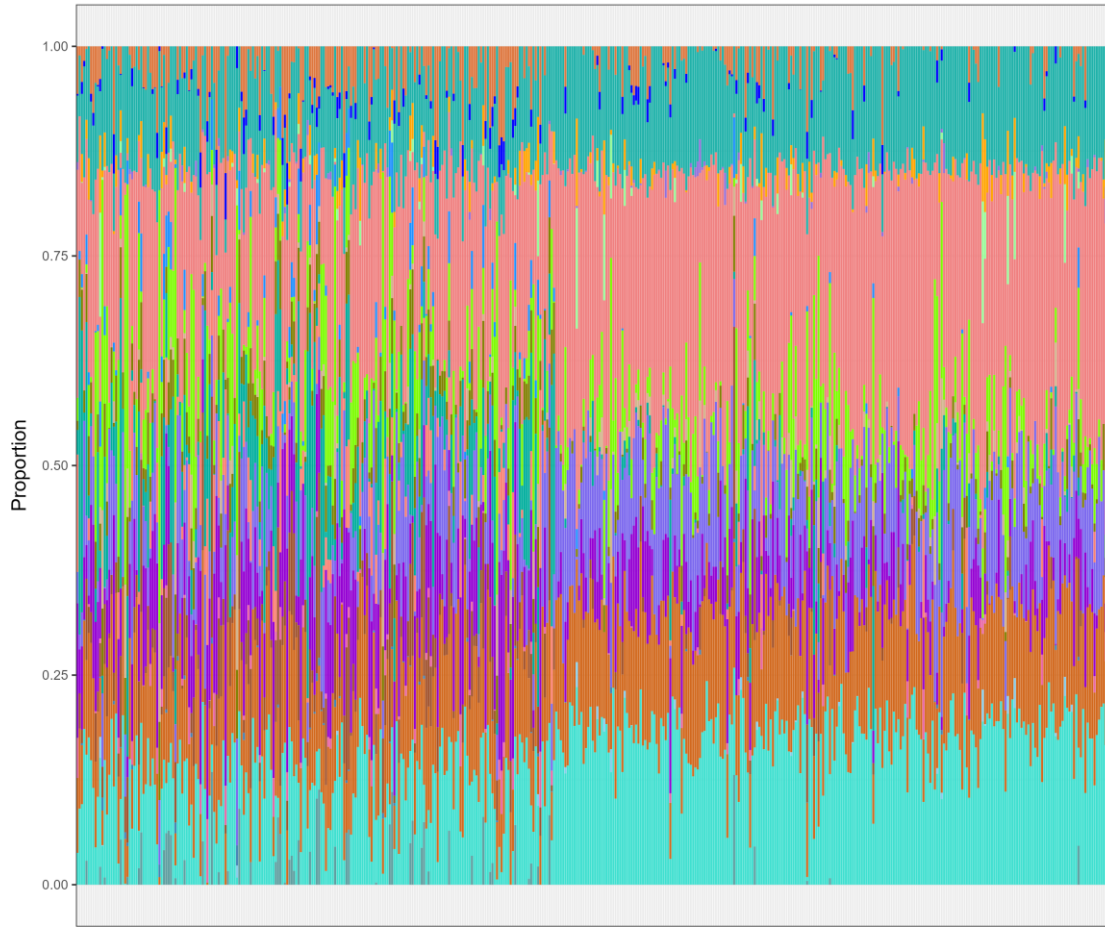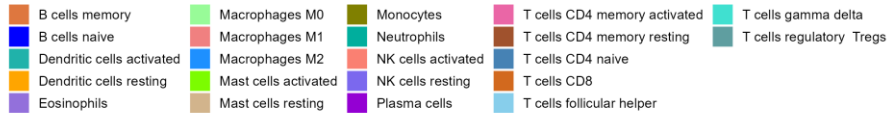

**P**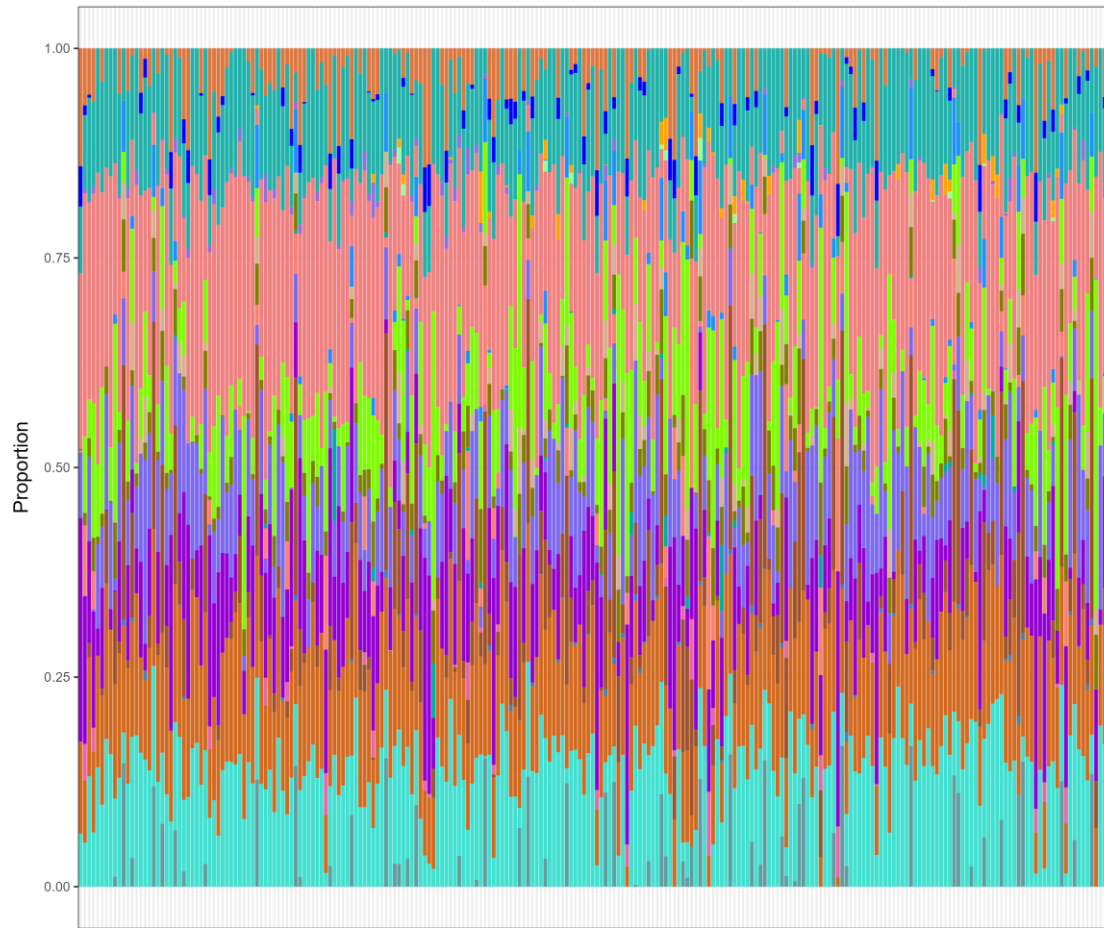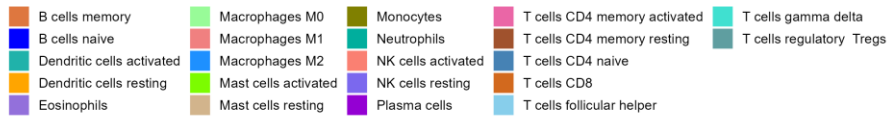

Q

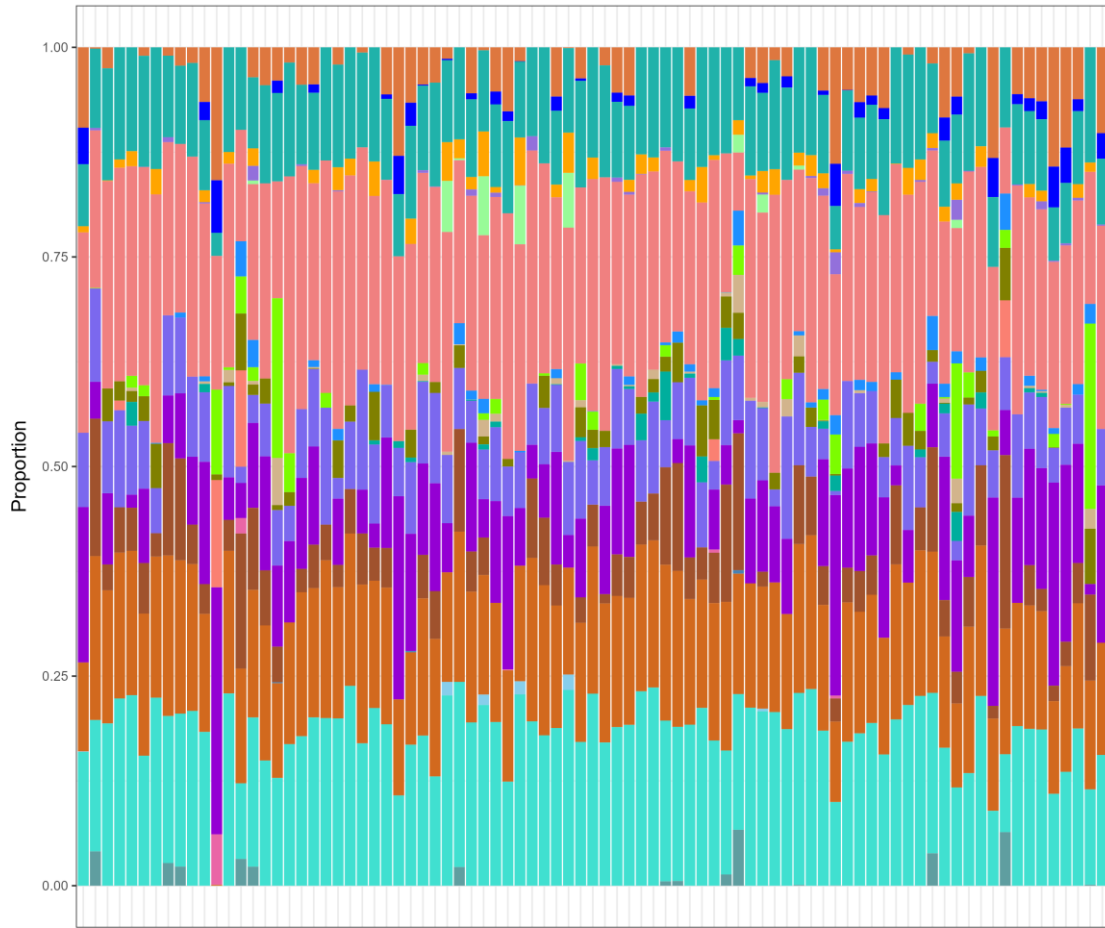

- |                                                                  |                                                             |                                                           |                                                                     |                                                                  |
|------------------------------------------------------------------|-------------------------------------------------------------|-----------------------------------------------------------|---------------------------------------------------------------------|------------------------------------------------------------------|
| <span style="color: #C85130;">■</span> B cells memory            | <span style="color: #90EE90;">■</span> Macrophages M0       | <span style="color: #6B8E23;">■</span> Monocytes          | <span style="color: #F08080;">■</span> T cells CD4 memory activated | <span style="color: #40E0D0;">■</span> T cells gamma delta       |
| <span style="color: #0000FF;">■</span> B cells naive             | <span style="color: #F08080;">■</span> Macrophages M1       | <span style="color: #008080;">■</span> Neutrophils        | <span style="color: #8B4513;">■</span> T cells CD4 memory resting   | <span style="color: #5F7380;">■</span> T cells regulatory Tregs  |
| <span style="color: #00B0F0;">■</span> Dendritic cells activated | <span style="color: #00B0F0;">■</span> Macrophages M2       | <span style="color: #008000;">■</span> NK cells activated | <span style="color: #4682B4;">■</span> T cells CD4 naive            | <span style="color: #4682B4;">■</span> T cells CD4 naive         |
| <span style="color: #FFA500;">■</span> Dendritic cells resting   | <span style="color: #ADFF2F;">■</span> Mast cells activated | <span style="color: #8A2BE2;">■</span> NK cells resting   | <span style="color: #FF8C00;">■</span> T cells CD8                  | <span style="color: #ADD8E6;">■</span> T cells follicular helper |
| <span style="color: #9370DB;">■</span> Eosinophils               | <span style="color: #D2B48C;">■</span> Mast cells resting   | <span style="color: #800080;">■</span> Plasma cells       |                                                                     |                                                                  |

**R**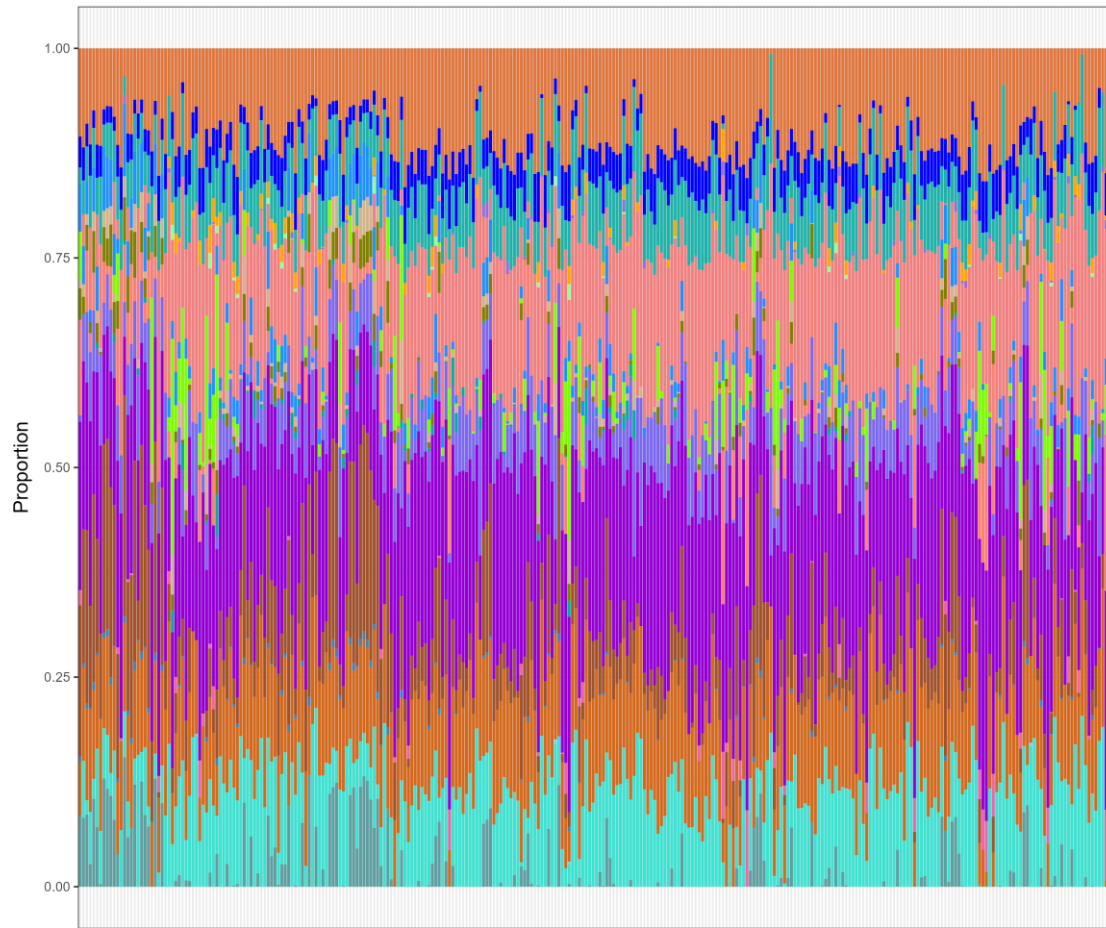

**S**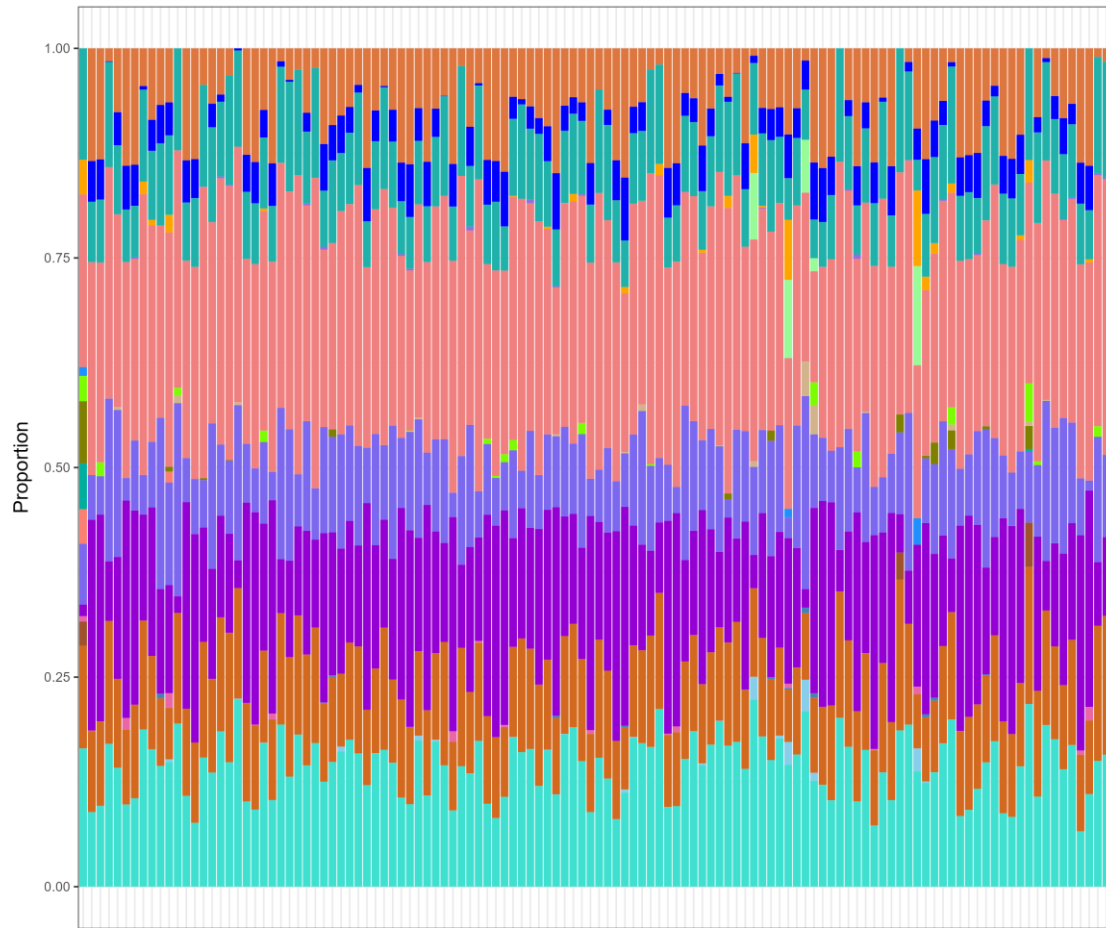

**T**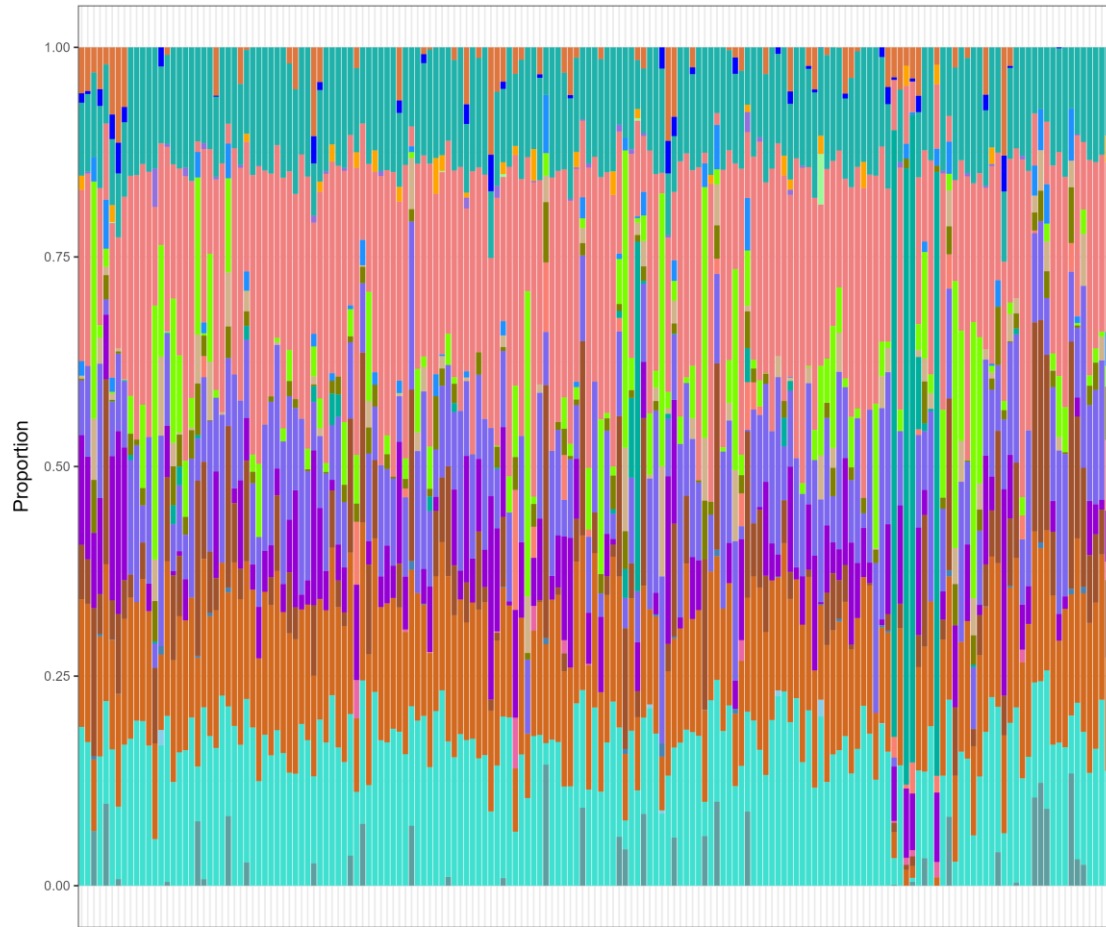

U

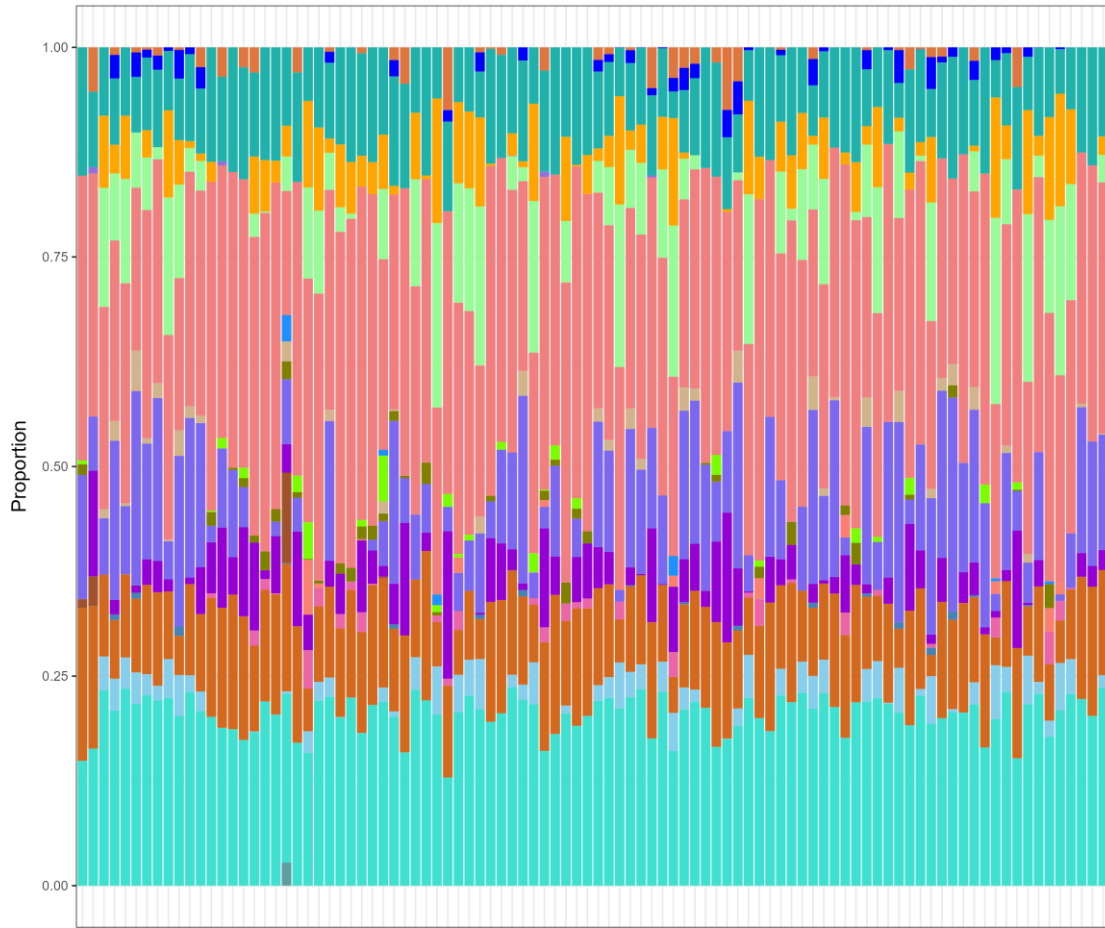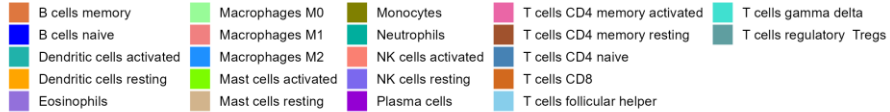

**V**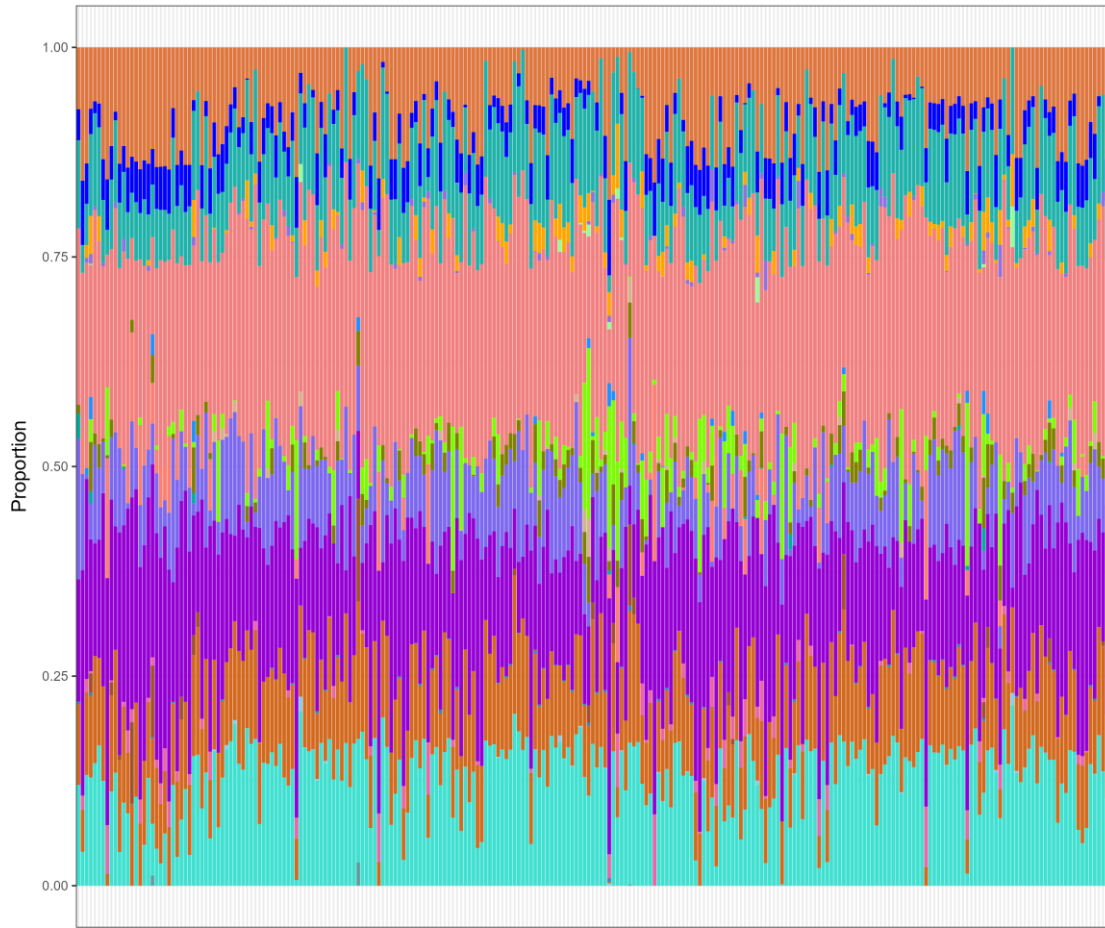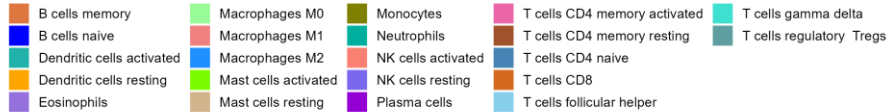

**W**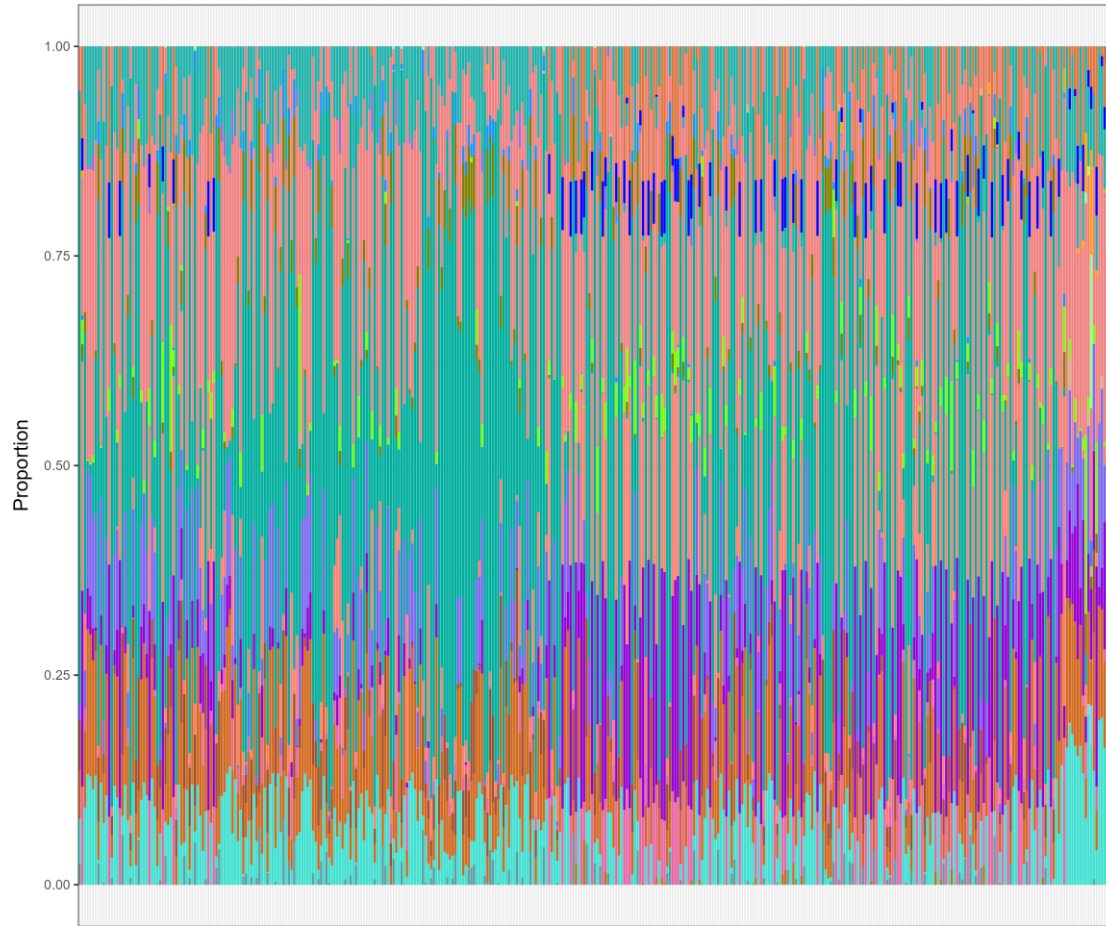

**X**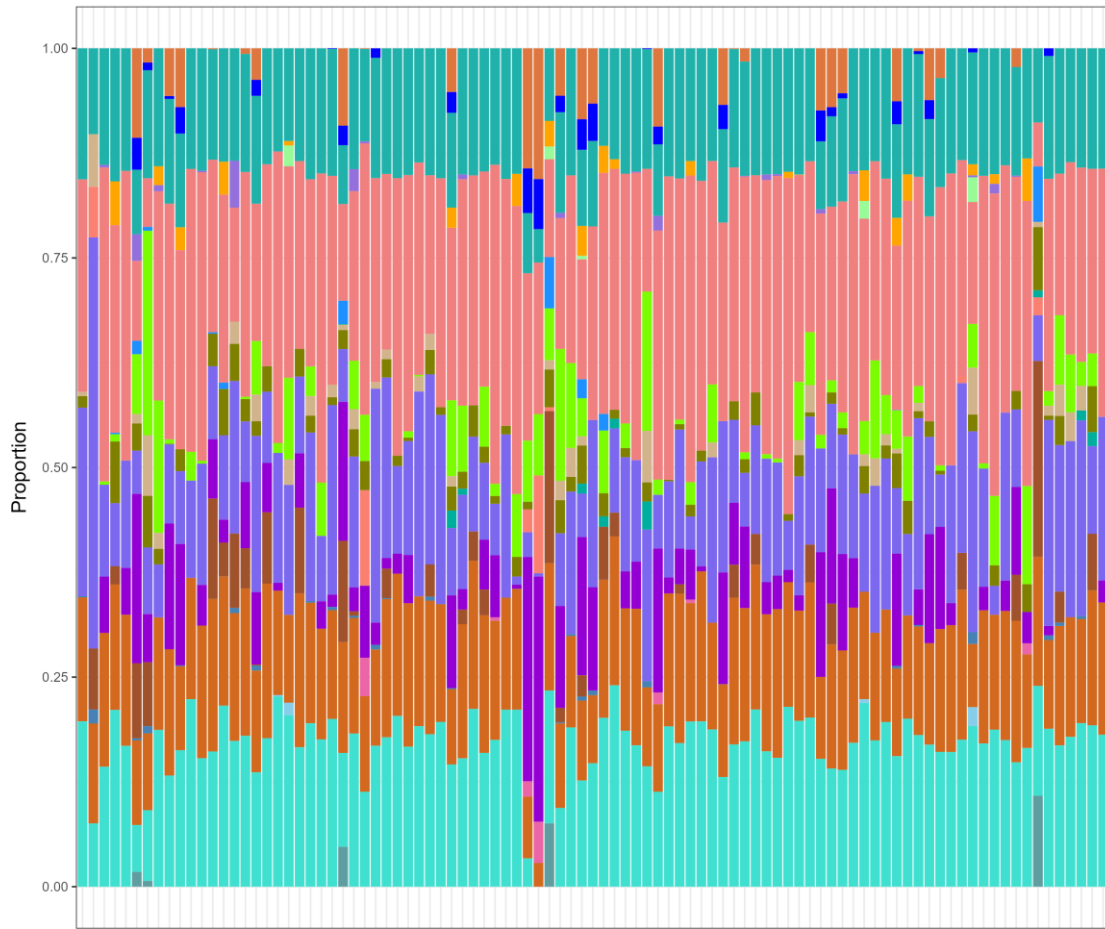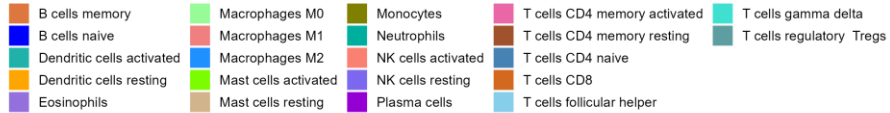

Y

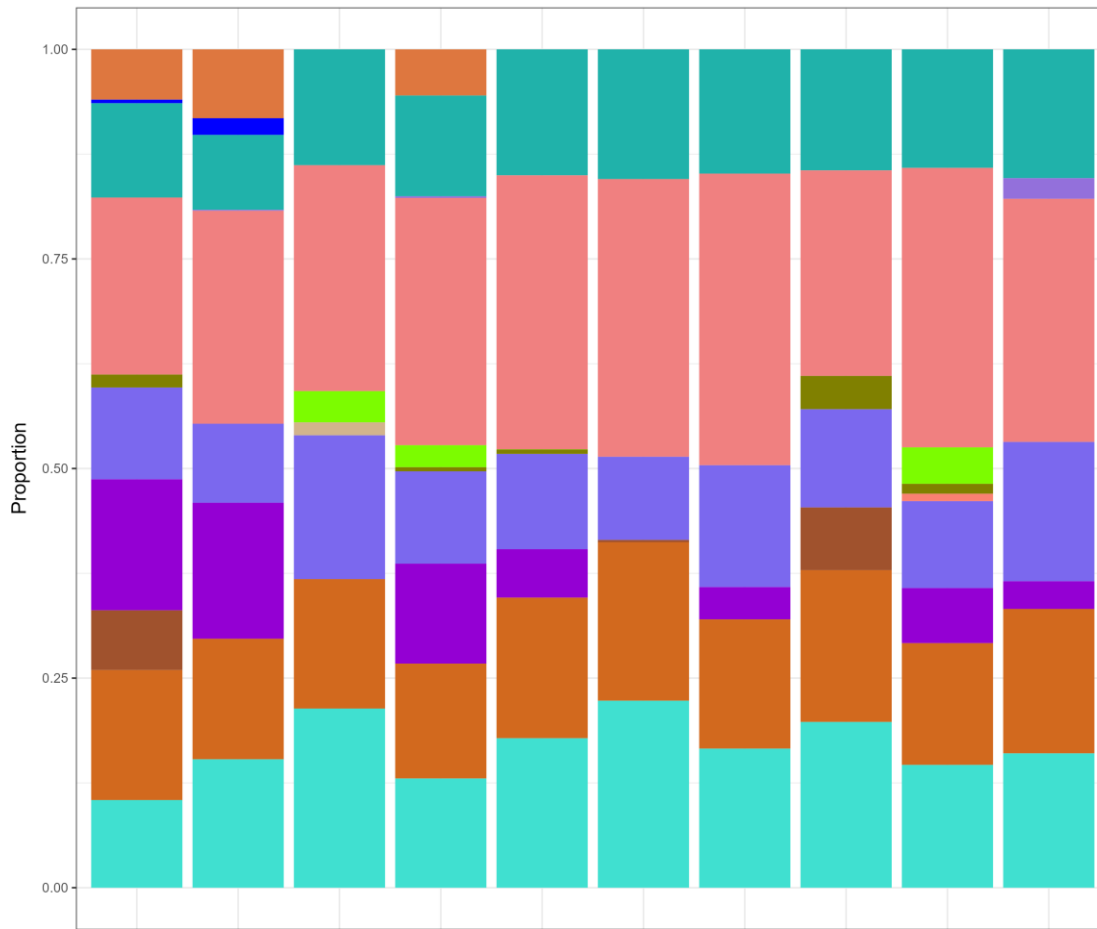

The proportion of immune cells in (A) ACC, (B) BLCA, (C) BRCA, (D) CHOL, (E) DLBC, (F) ESCA, (G) GBM, (H) HNSC, (I) KICH, (J) KIRC, (K) KIRP, (L) LGG, (M) LIHC, (N) LUAD, (O) LUSC, (P) OV, (Q) PAAD, (R) PRAD, (S) SKCM, (T) STAD, (U) TGCT, (V) THCA, (W) THYM, (X) UCEC, and (Y) UCS.
