# Supplementary material for: Comprehensive bioinformatics analysis of human cytomegalovirus pathway genes in pan-cancer
Source: Springer Nature journal article supplement (doi:10.1186/s40246-024-00633-5), 2024-06-17
Supplement: MOESM7 [file 40246_2024_633_MOESM7_ESM.pdf]

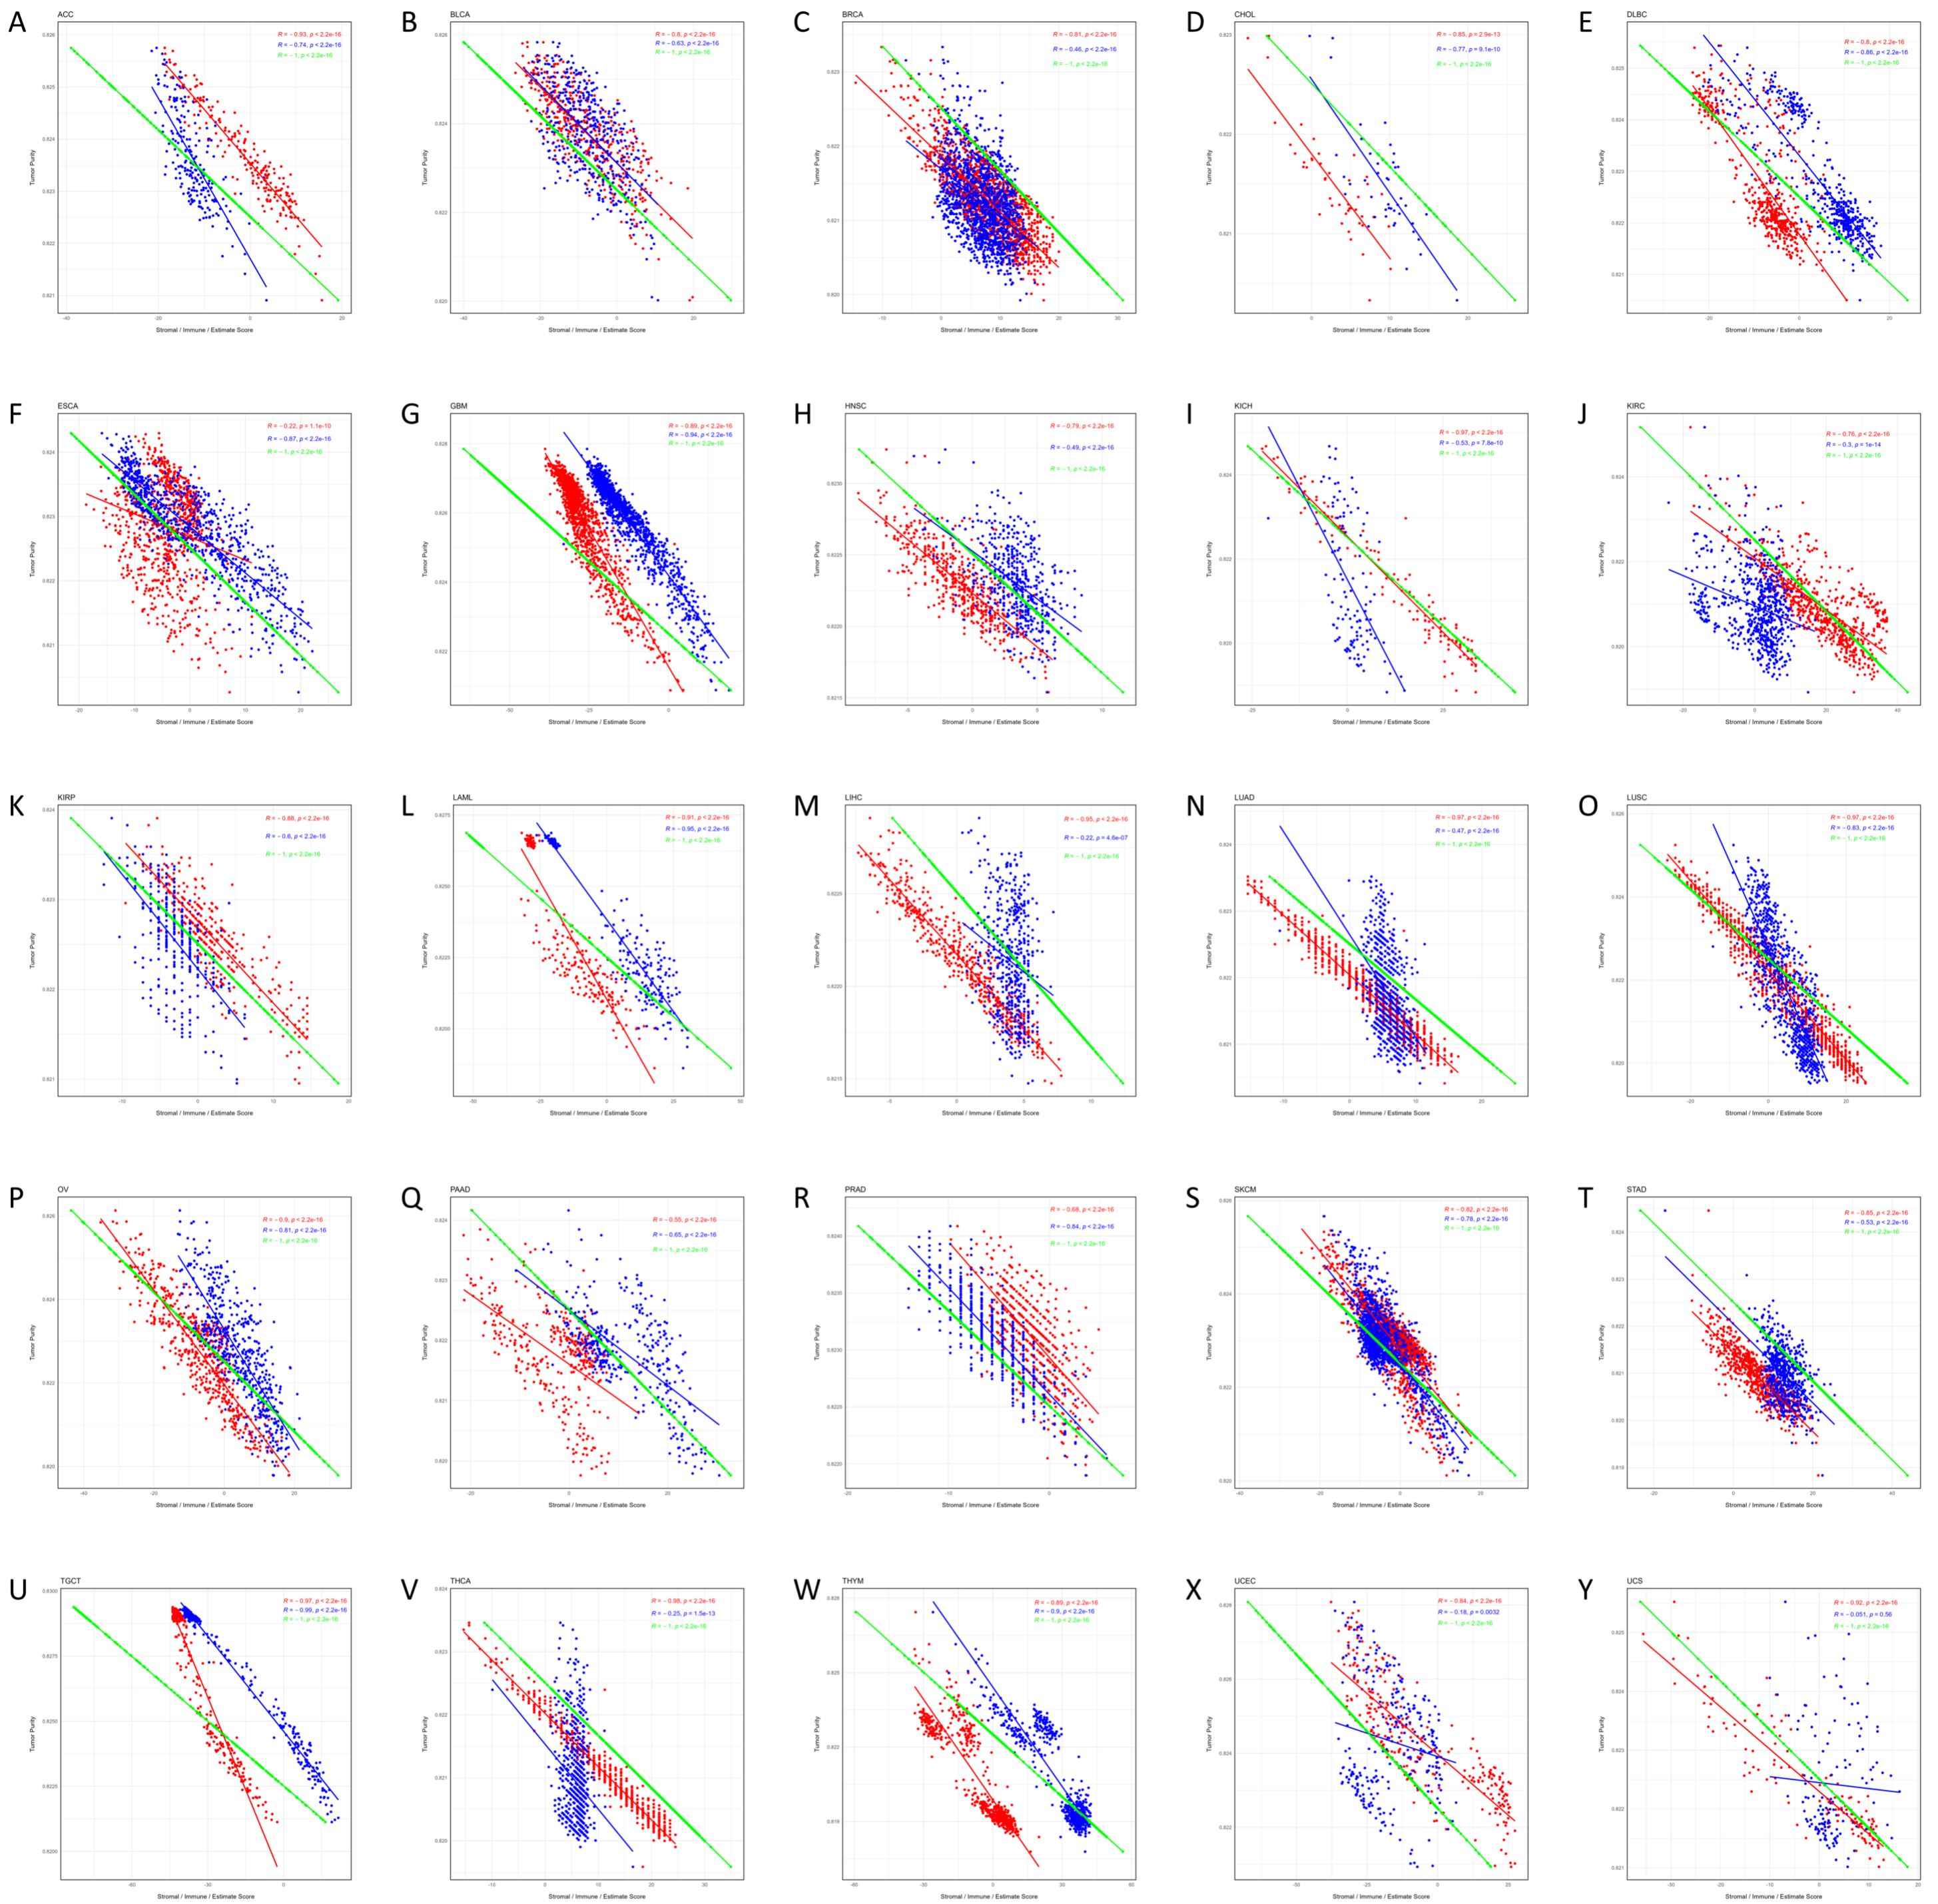

Stromal scores, immune scores and estimate scores Correlation with tumor purity of (A) ACC, (B) BLCA, (C) BRCA, (D) CHOL, (E) DLBC, (F) ESCA, (G) GBM, (H) HNSC, (I) KICH, (J) KIRC, (K) KIRP, (L) LAML, (M) LIHC, (N) LUAD, (O) LUSC, (P) OV, (Q) PAAD, (R) PRAD, (S) SKCM, (T) STAD, (U) TGCT, (V) THCA, (W) THYM, (X) UCEC, (Y) UCS. Red represents the correlation between Stromal Score and tumor purity, blue represents the correlation between Immune Score and tumor purity, green represents the correlation between ESTIMATE Score represents the correlation with tumor purity.
