# Supplementary material for: Comprehensive bioinformatics analysis of human cytomegalovirus pathway genes in pan-cancer
Source: Springer Nature journal article supplement (doi:10.1186/s40246-024-00633-5), 2024-06-17
Supplement: MOESM8 [file 40246_2024_633_MOESM8_ESM.pdf]

# A

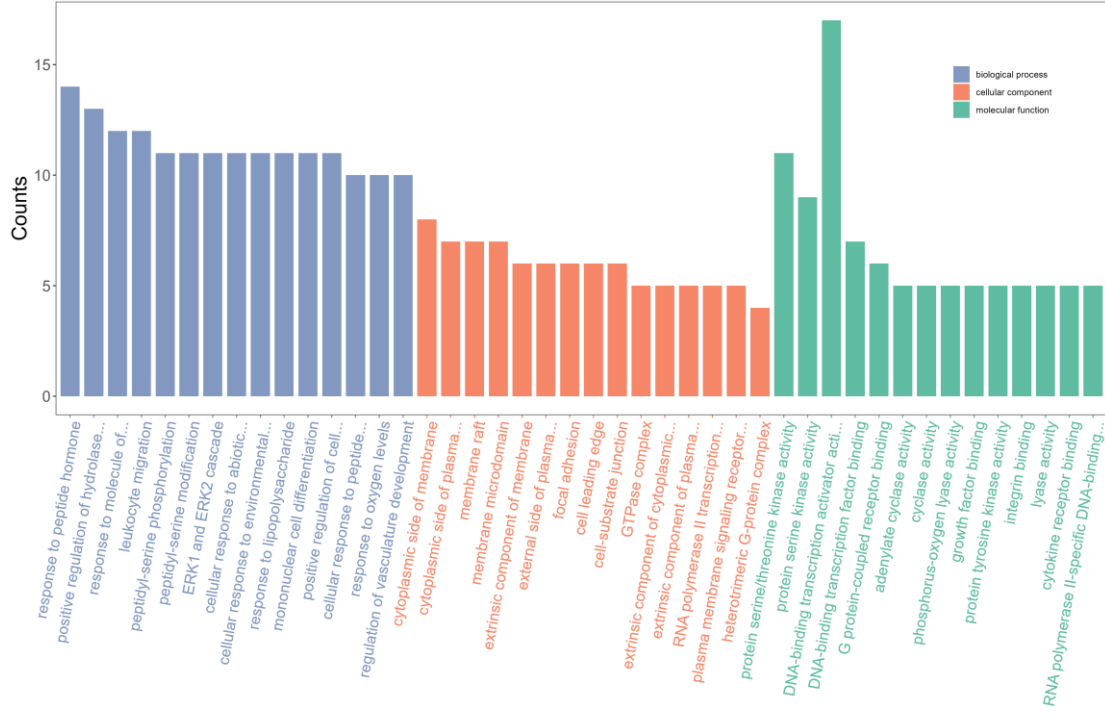

# B

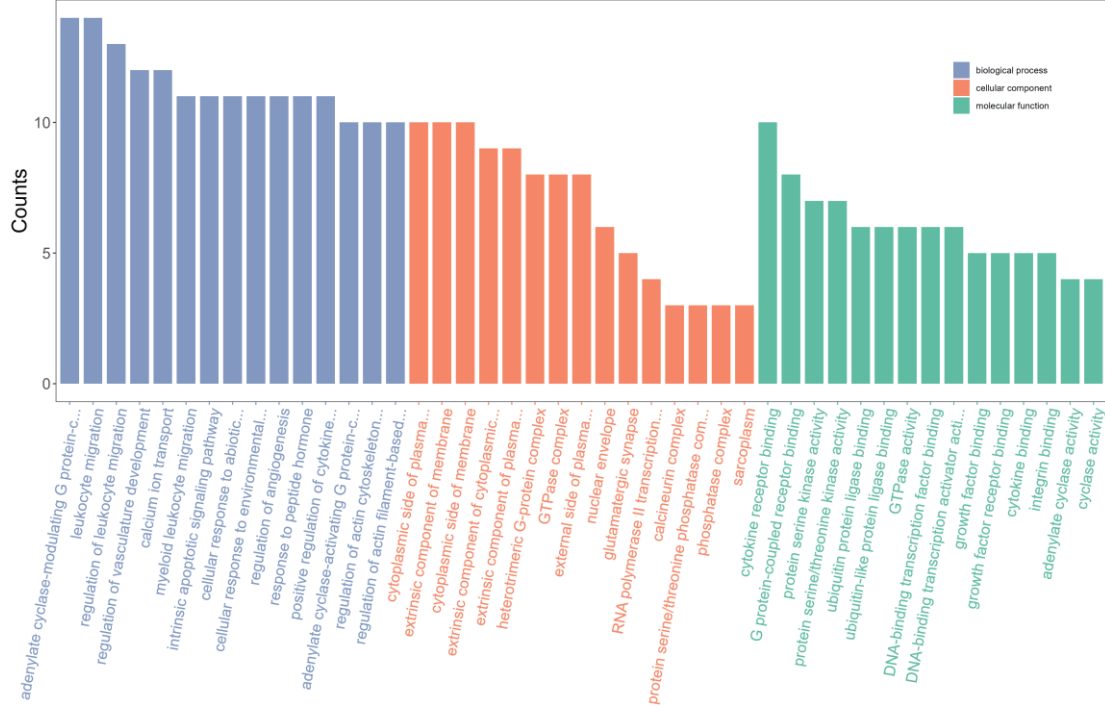

C

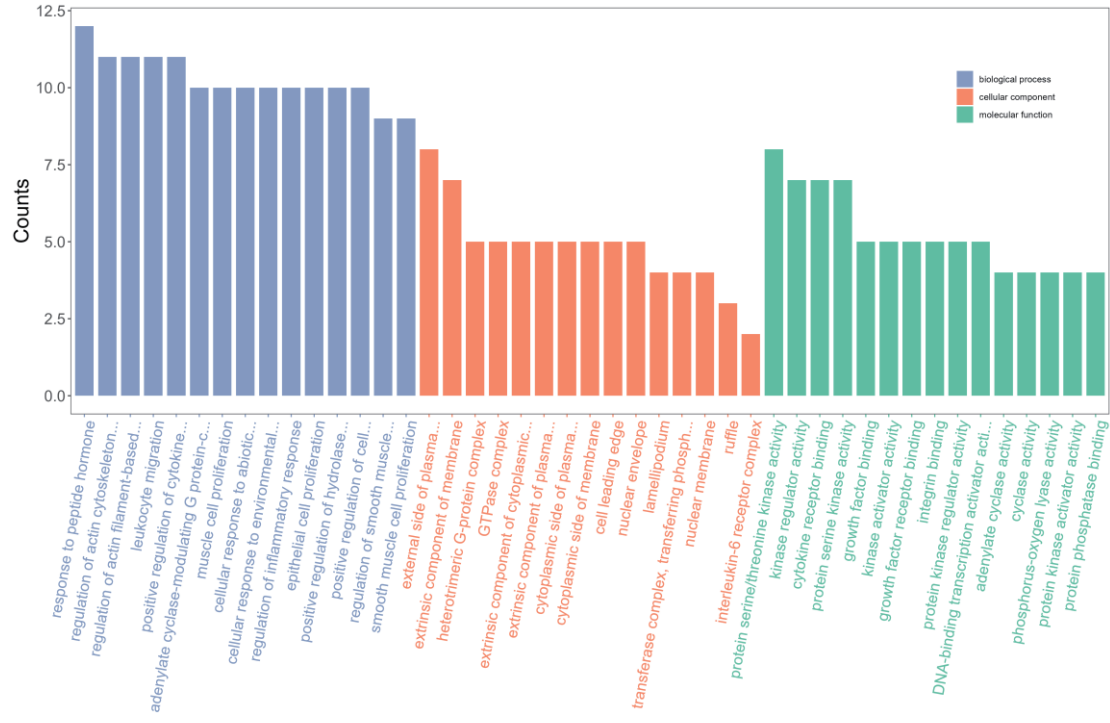

D

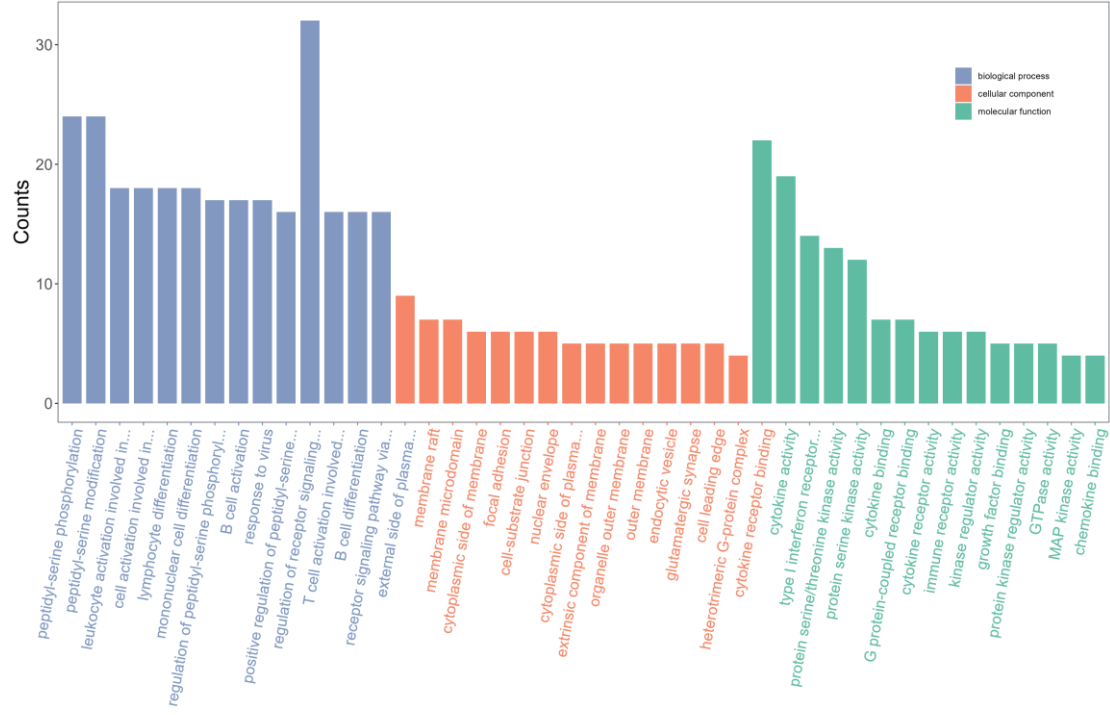

E

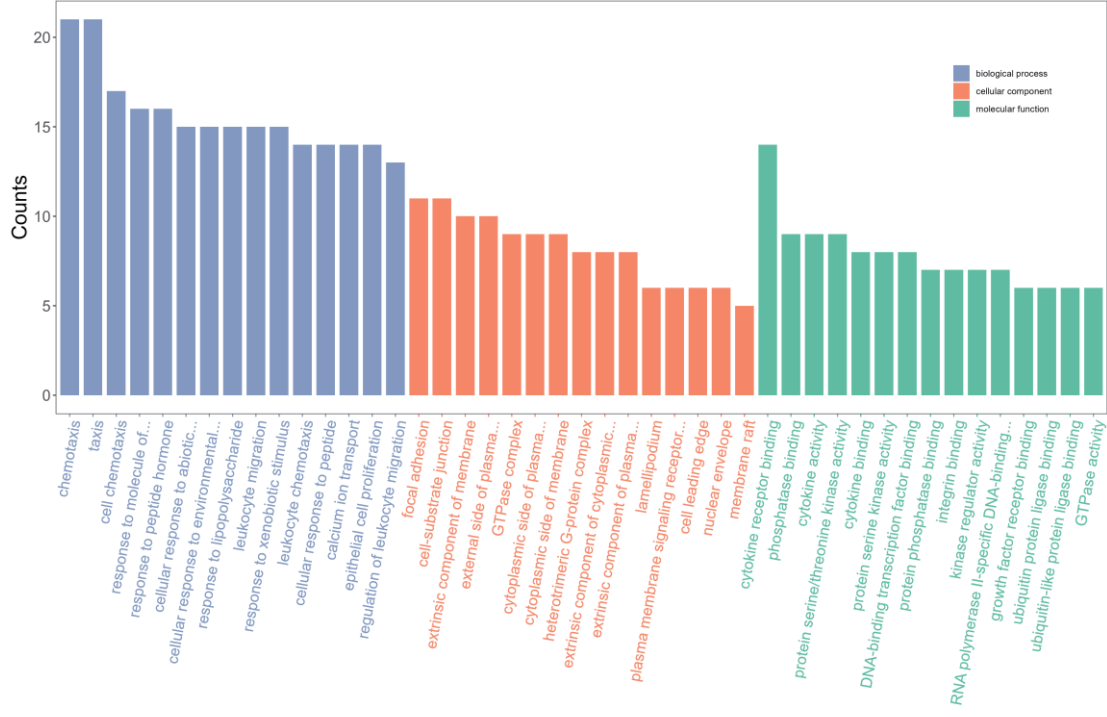

F

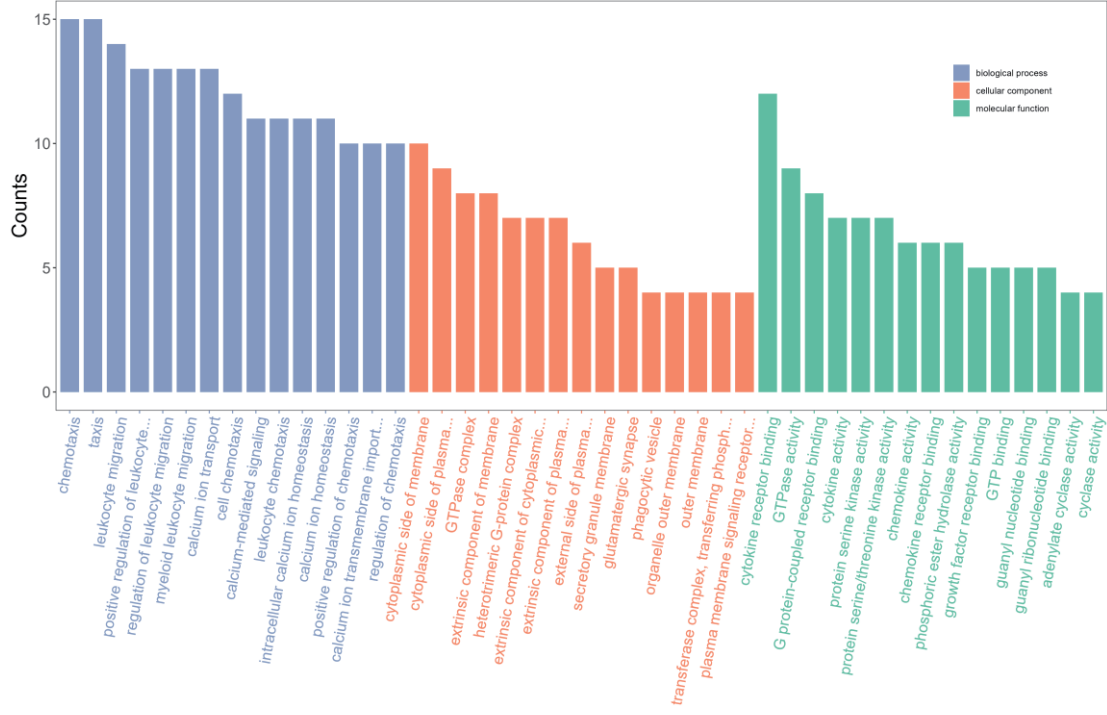

# H

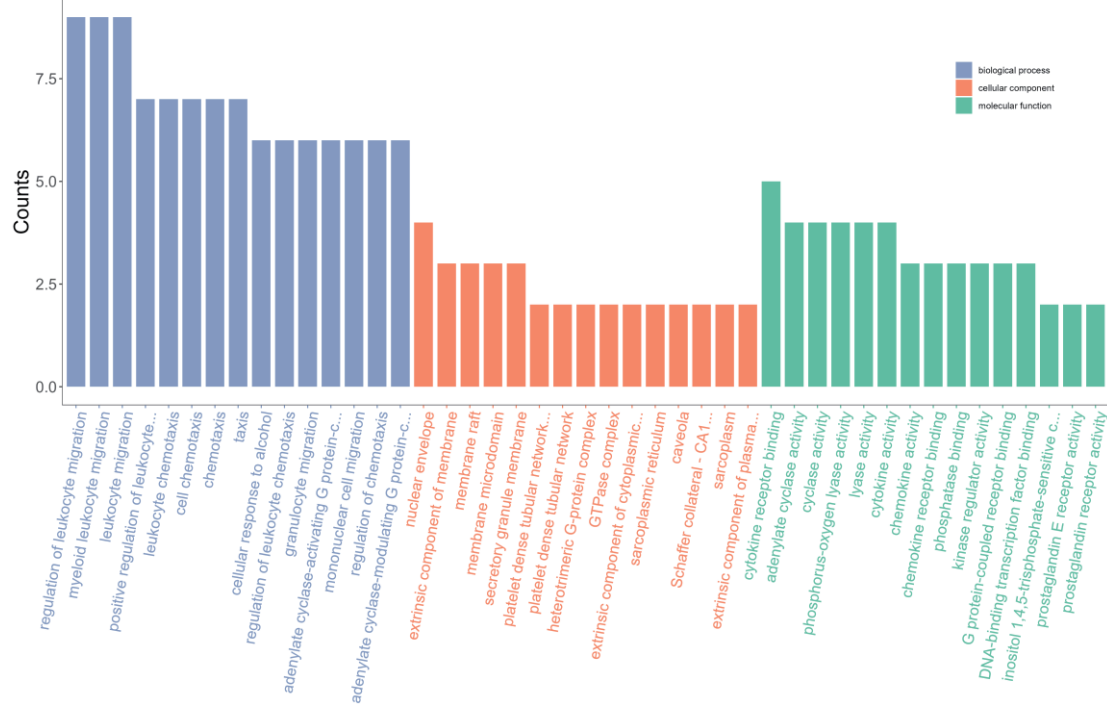

# G

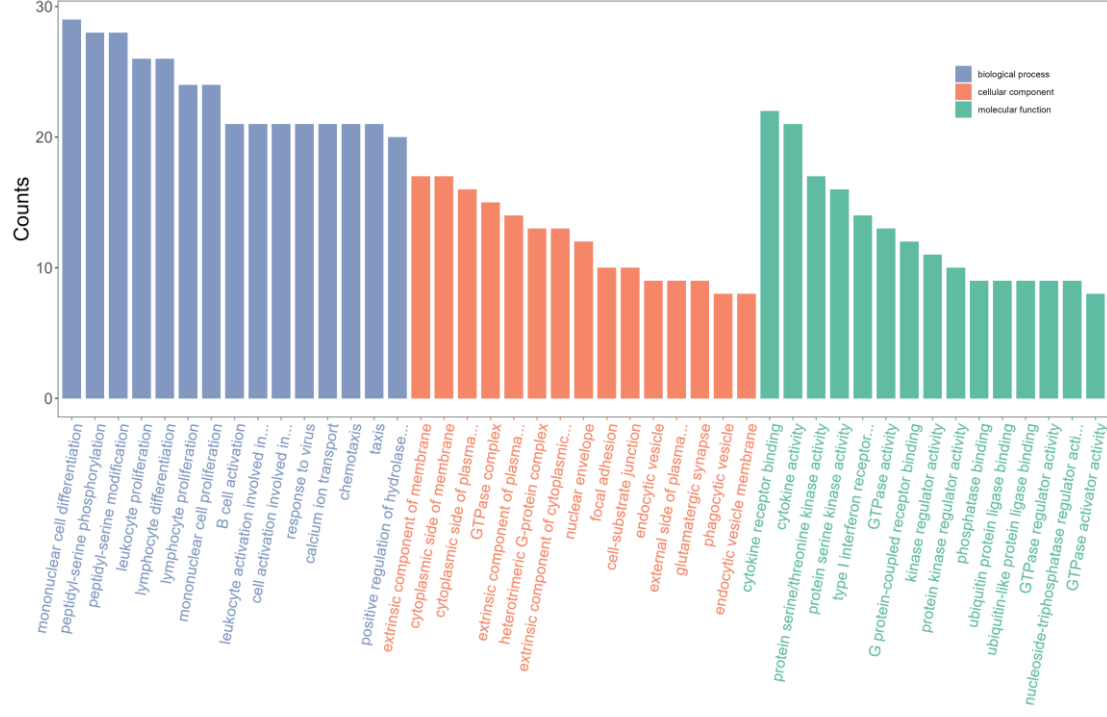

# I

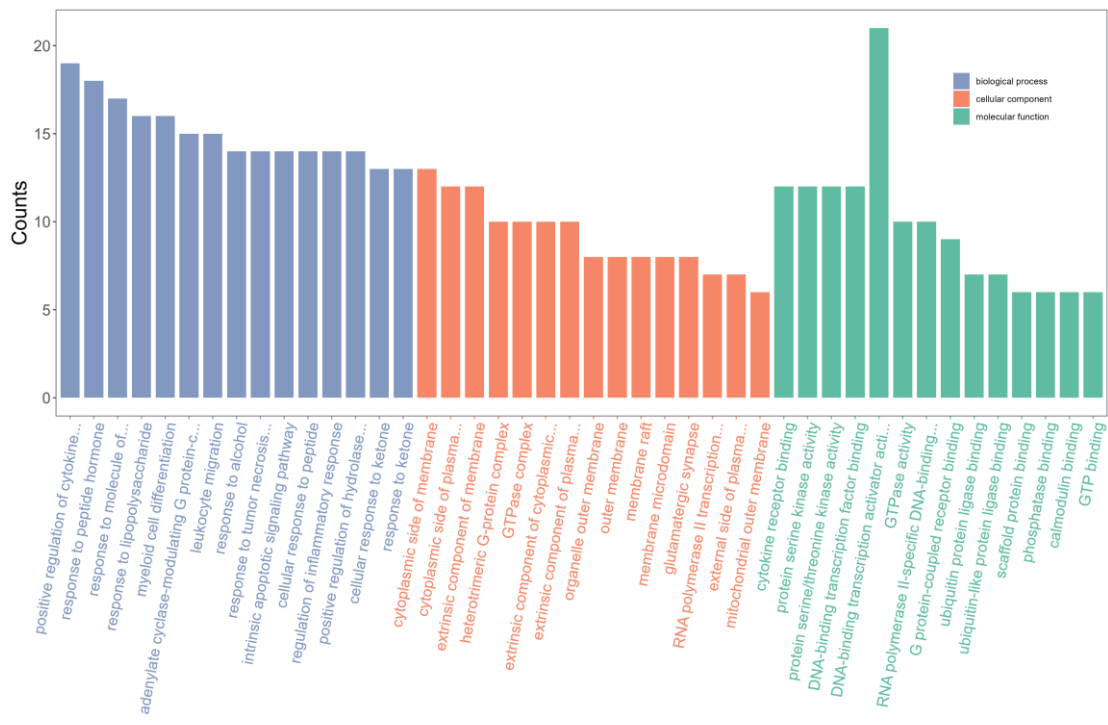

# J

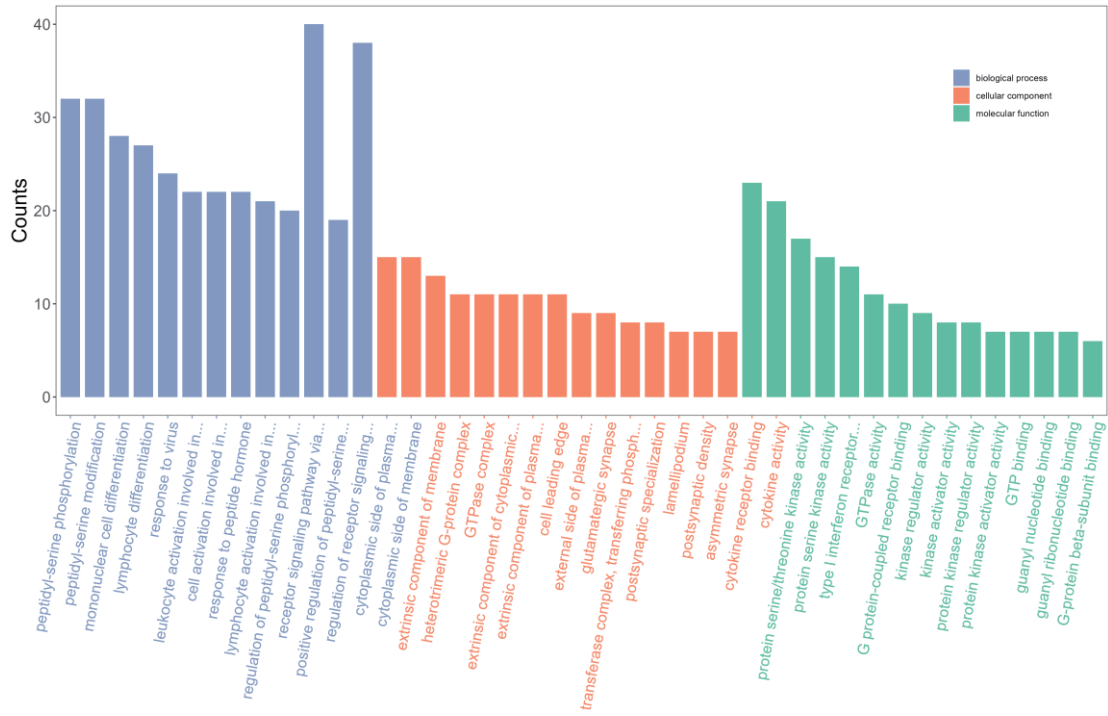

# K

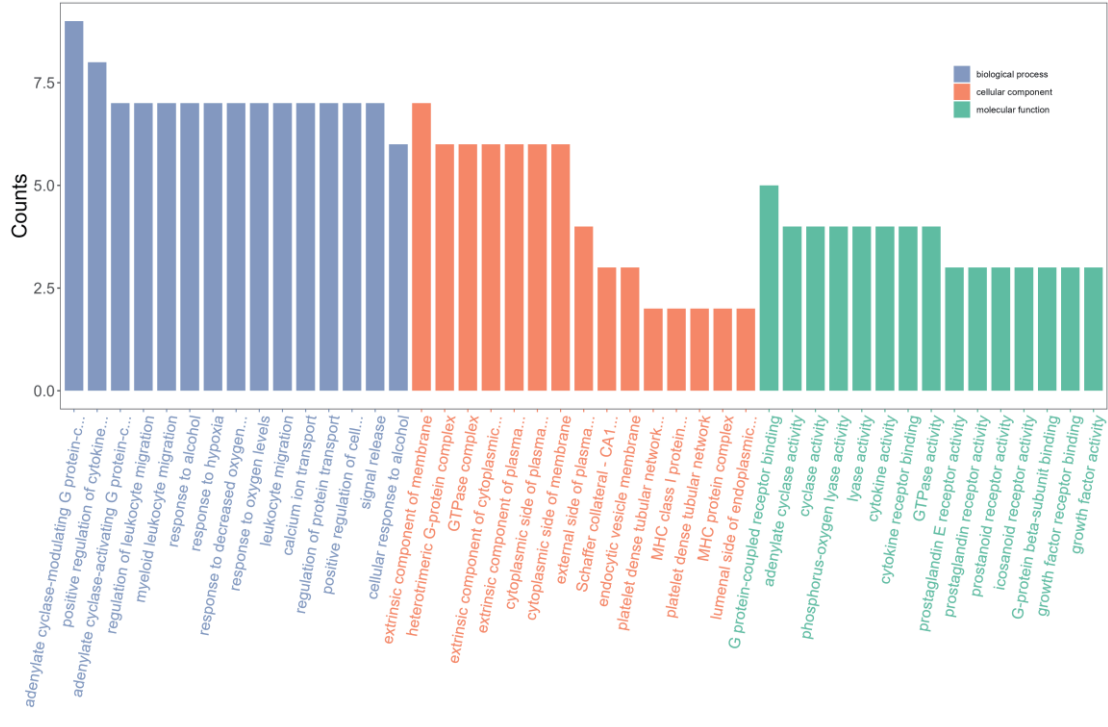

# L

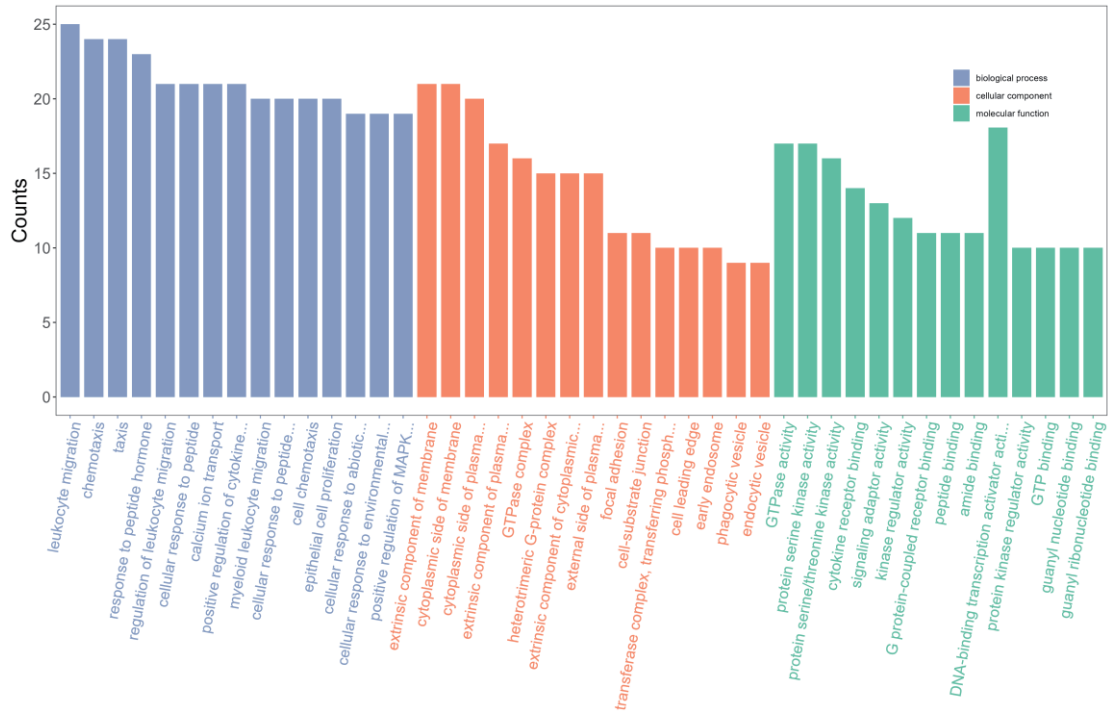

# M

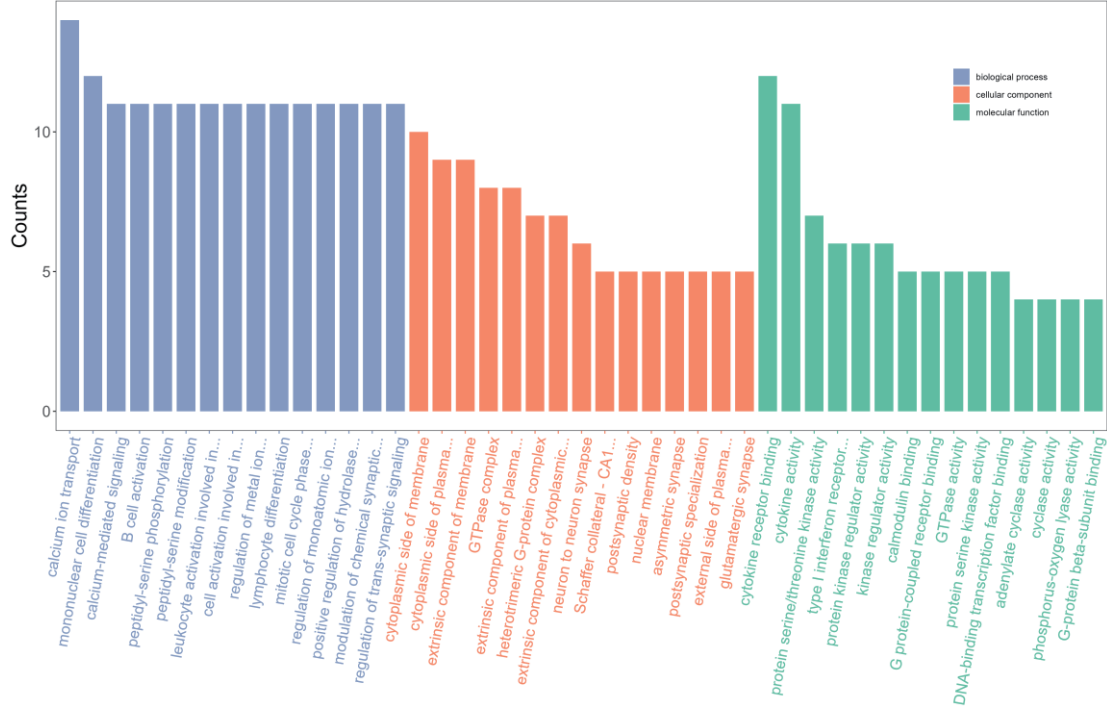

# N

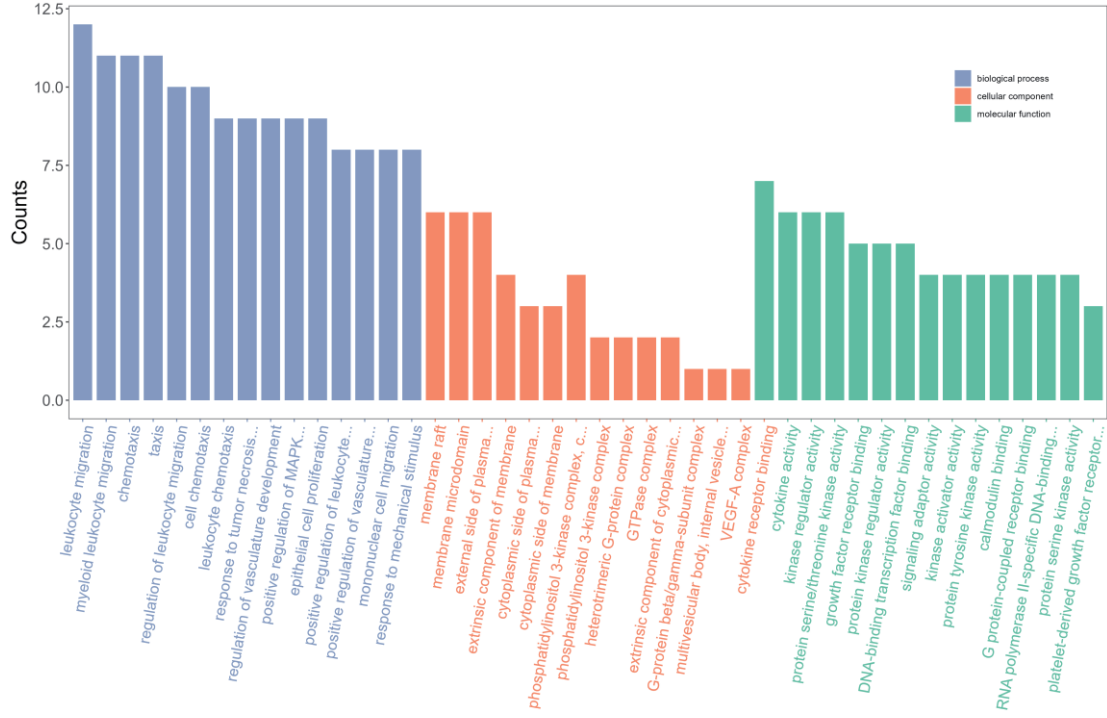

# O

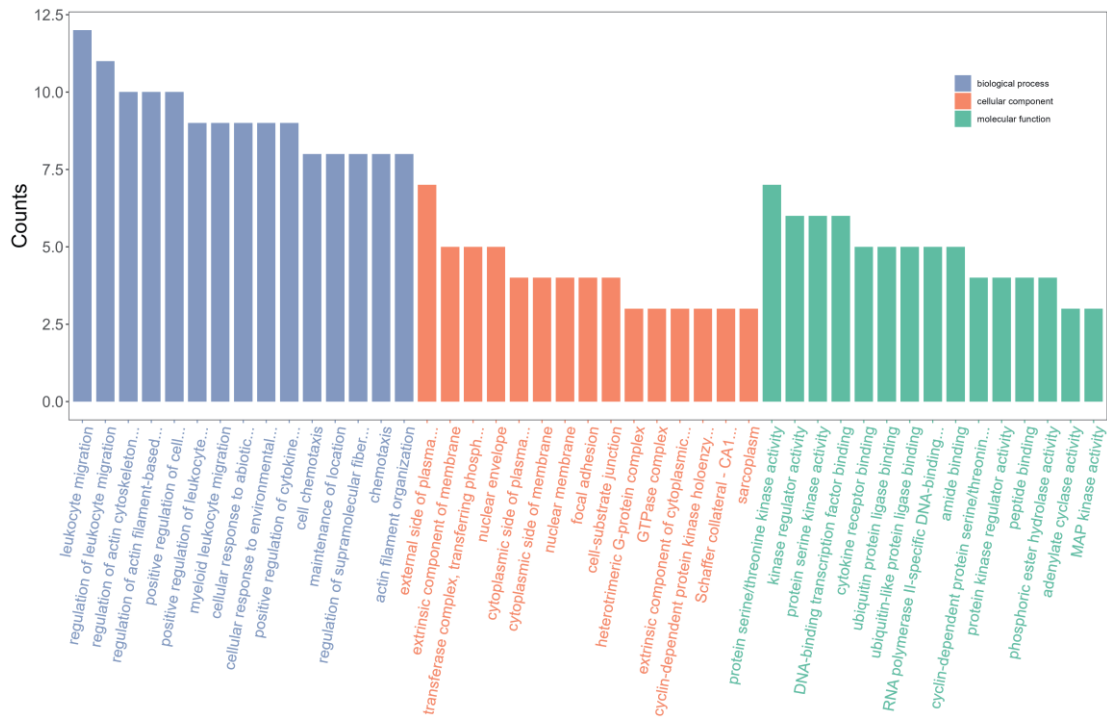

# P

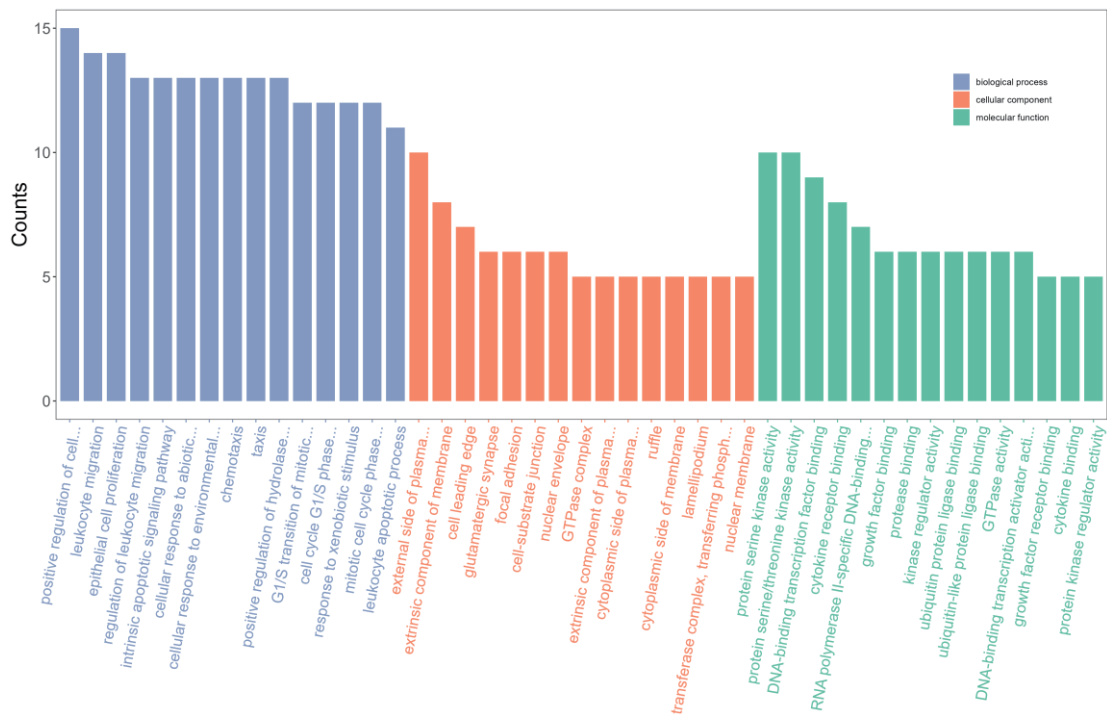

# Q

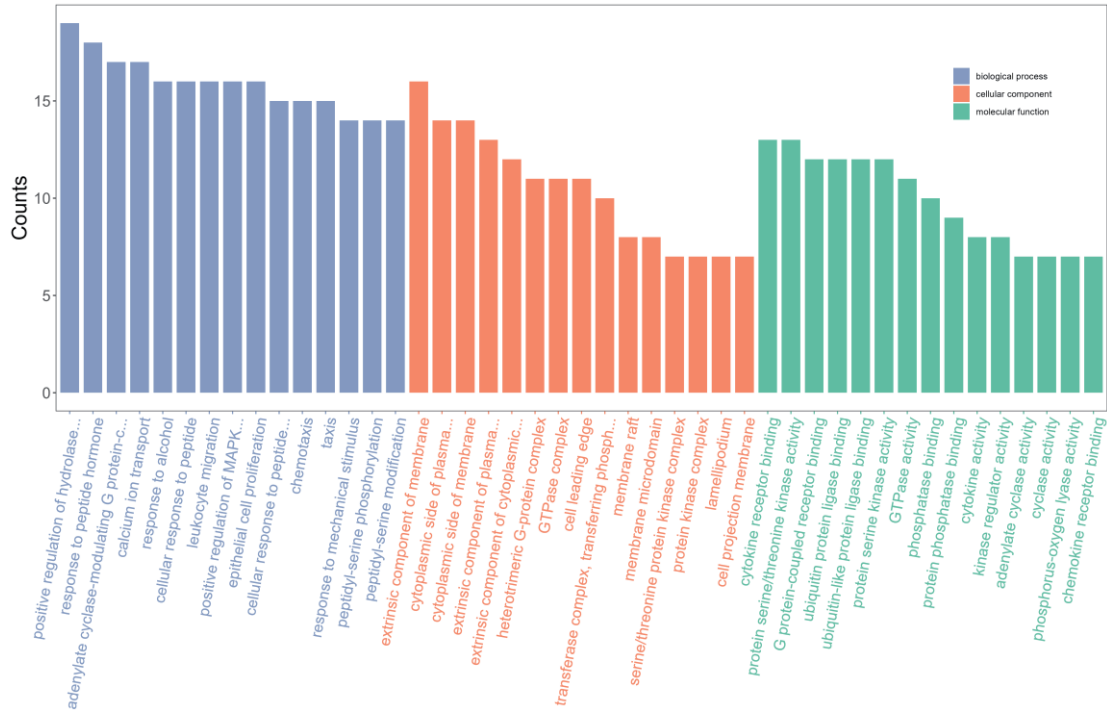

# R

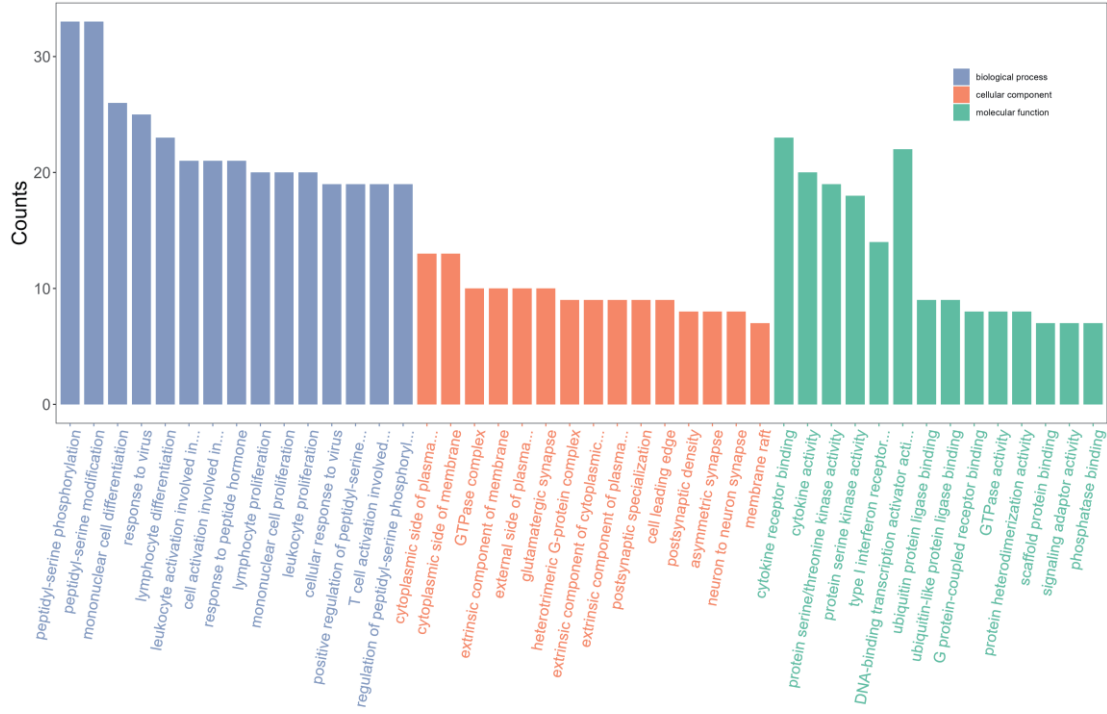

# T

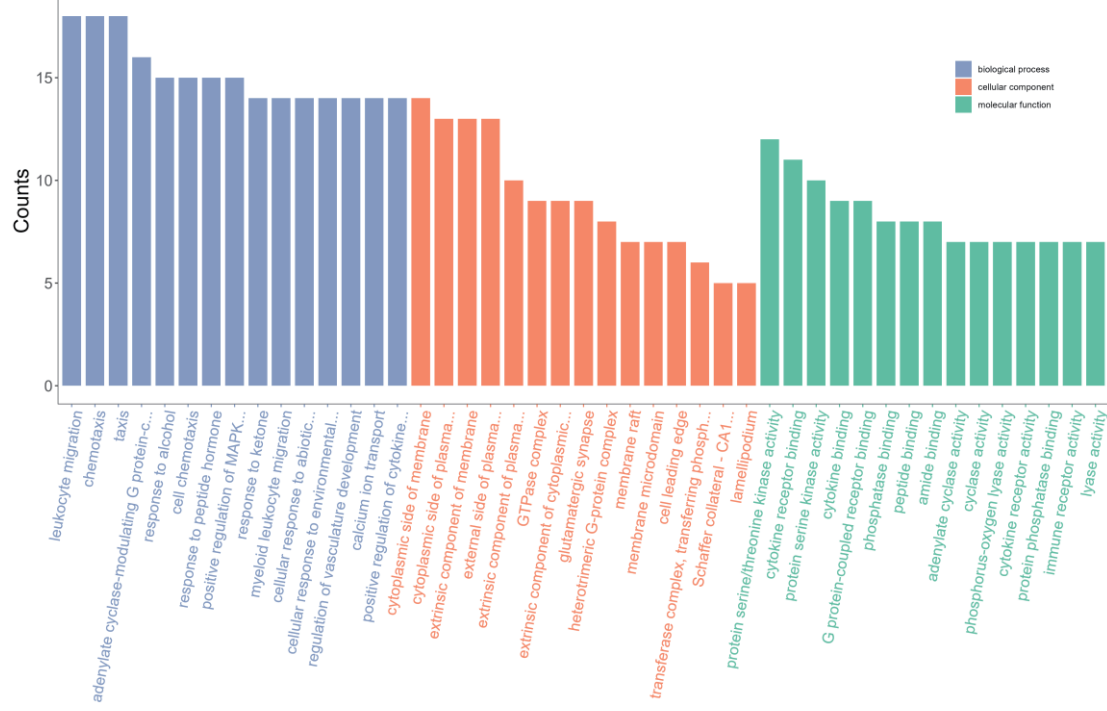

# S

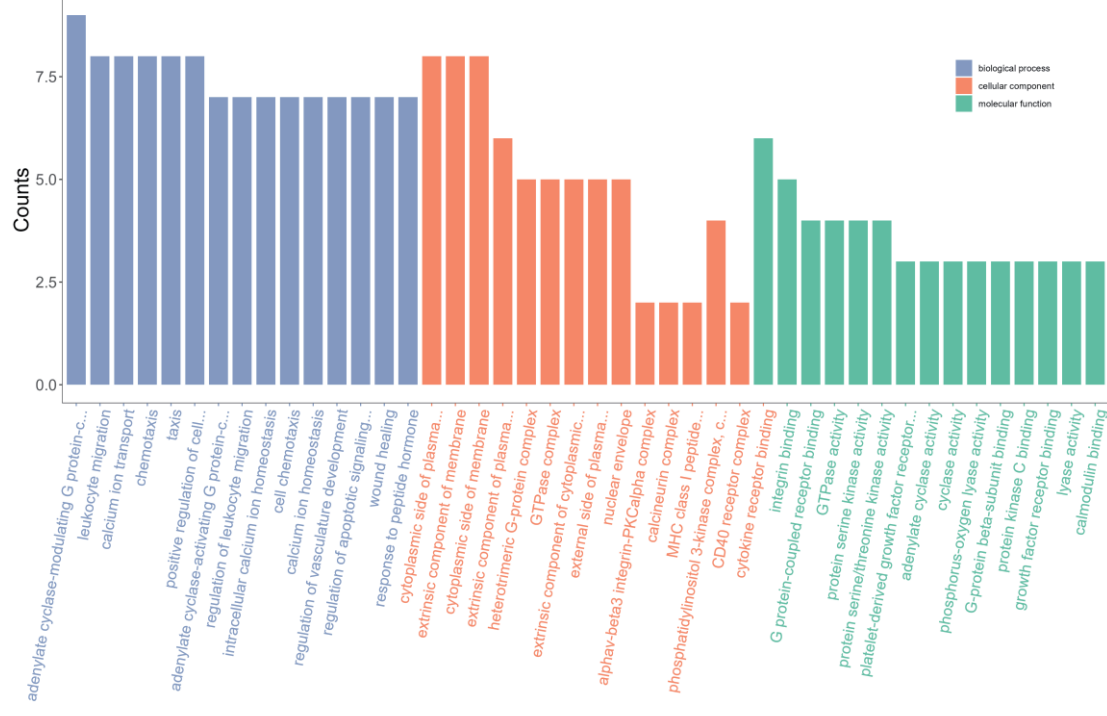

# U

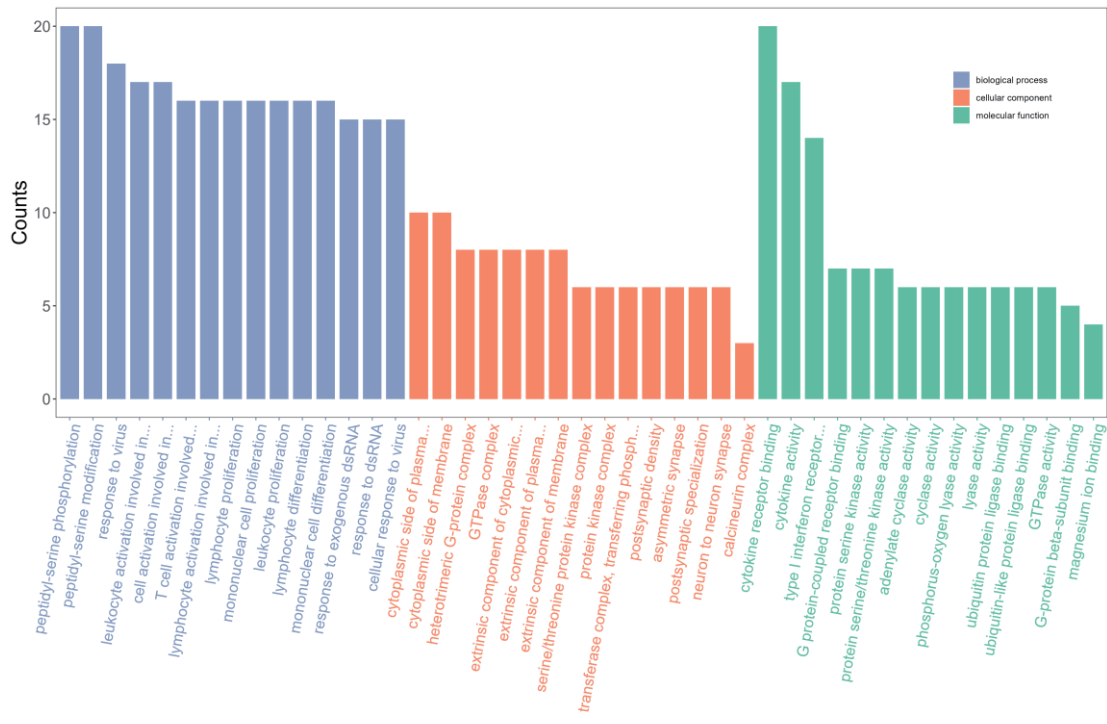

# V

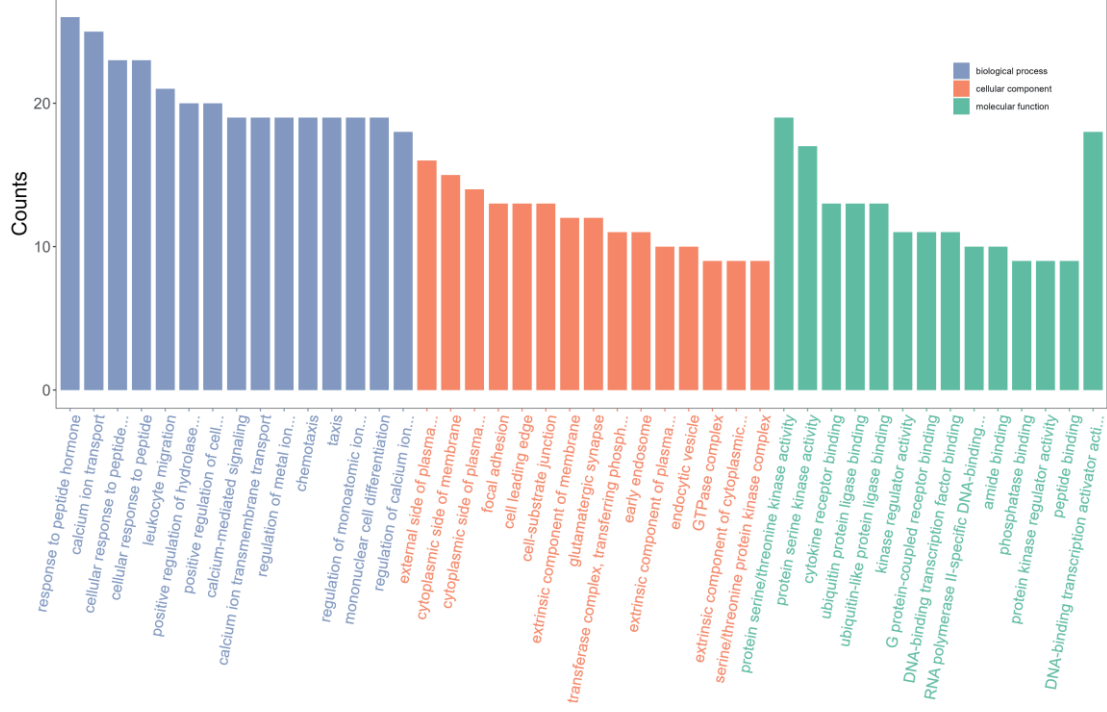

# W

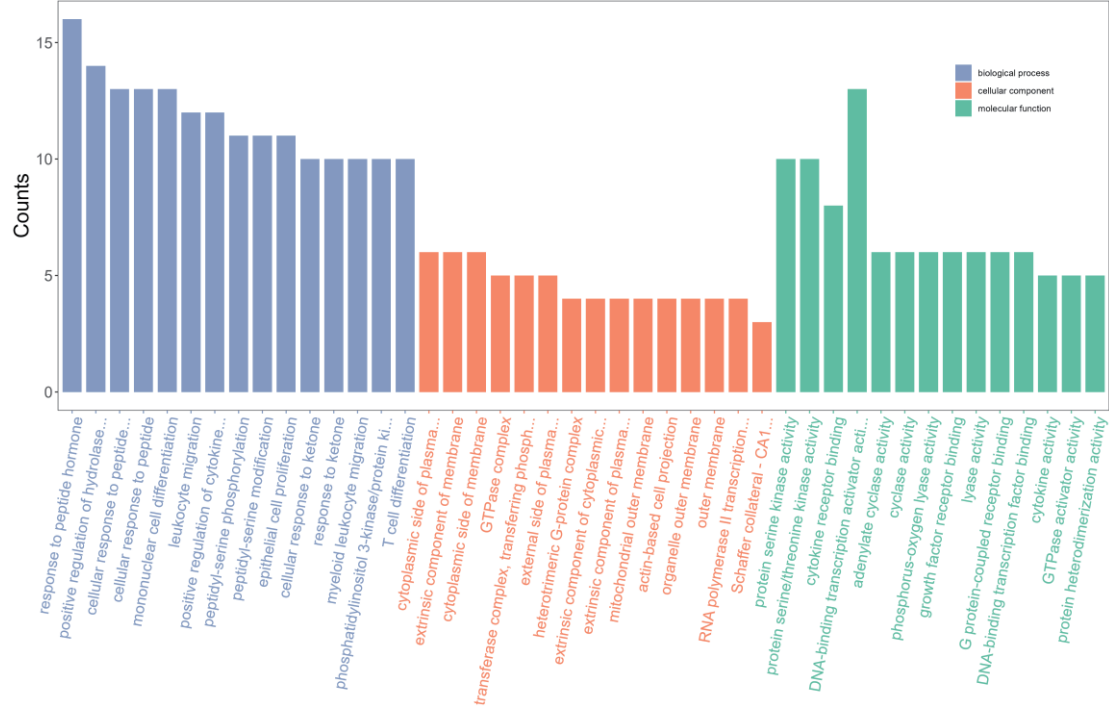

# X

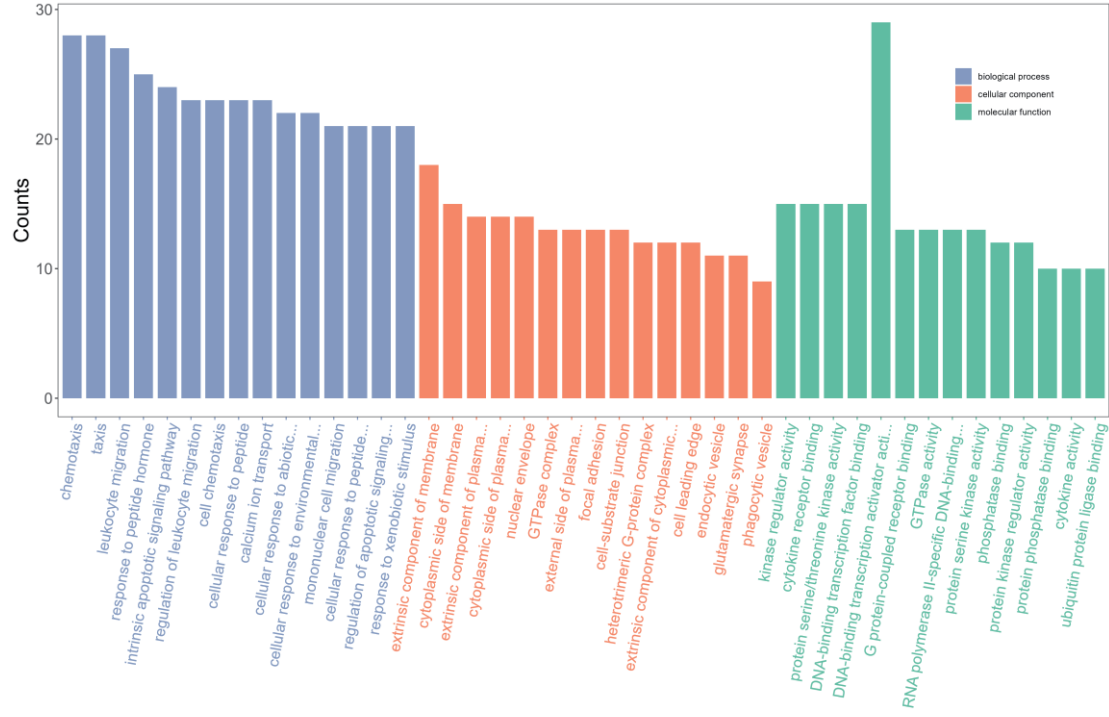

Y

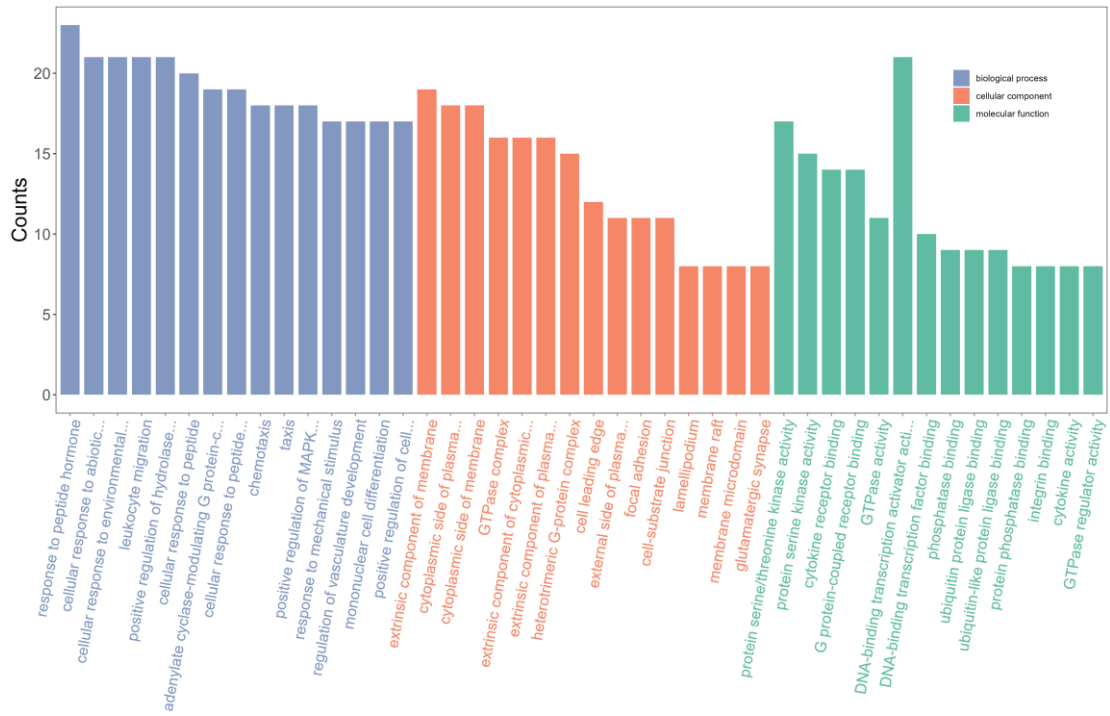

Z

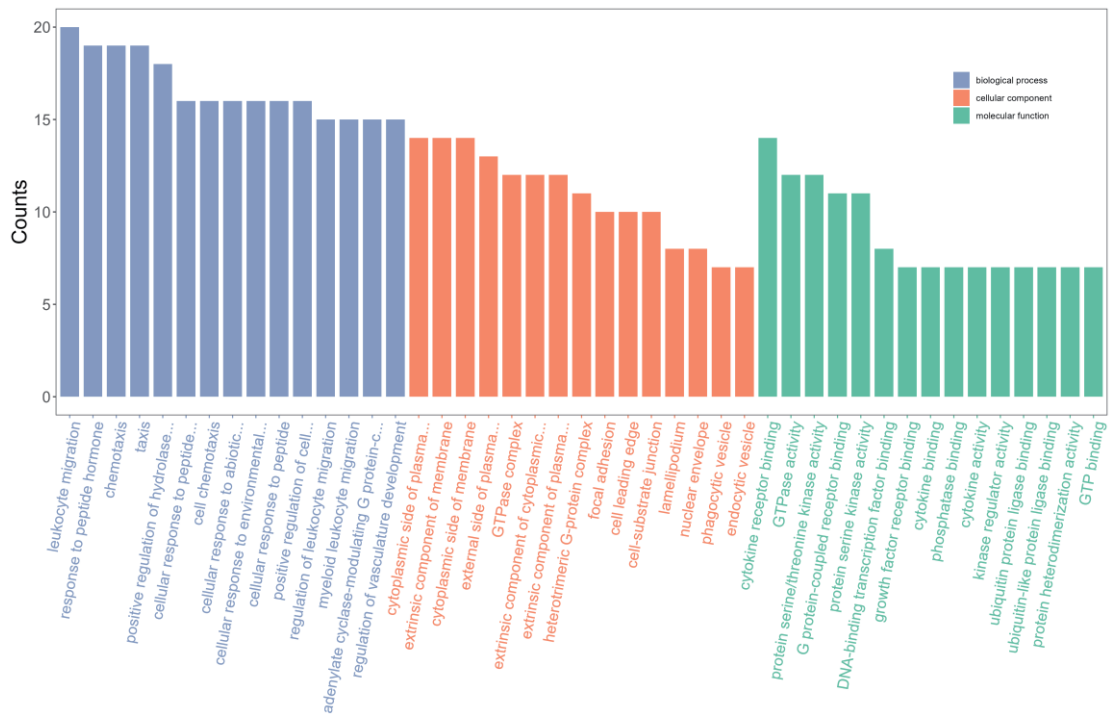

GO enrichment analyses in (A) ACC, (B) BLCA, (C) BRCA, (D) CHOL, (E) DLBC, (F) ESCA, (G) GBM, (H) HNSC, (I) KICH, (J) KIRC, (K) KIRP, (L) LAML, (M) LGG, (N) LIHC, (O) LUAD, (P) LUSC, (Q) OV, (R) PAAD, (S) PRAD, (T) SKCM, (U) STAD, (V) TGCT, (W) THCA, (X) THYM, (Y) UCEC, and (Z) UCS: The horizontal axis represents the potential functions enriched, while the vertical axis indicates the number of enrichments (from left to right, they are Biological Process (BP) in purple, Cellular Component (CC) in orange, and Molecular Function (MF) in green).
